# Supplementary material for: Baseline Severe Acute Respiratory Syndrome Viral Load Is Associated With Coronavirus Disease 2019 Severity and Clinical Outcomes: Post Hoc Analyses of a Phase 2/3 Trial
Source: PubMed Central journal article supplement — J Infect Dis. 2021 Sep 8;224(11):1830–8. doi: 10.1093/infdis/jiab445 (PMC8522400; doi:10.1093/infdis/jiab445), 2021-09-08

Age

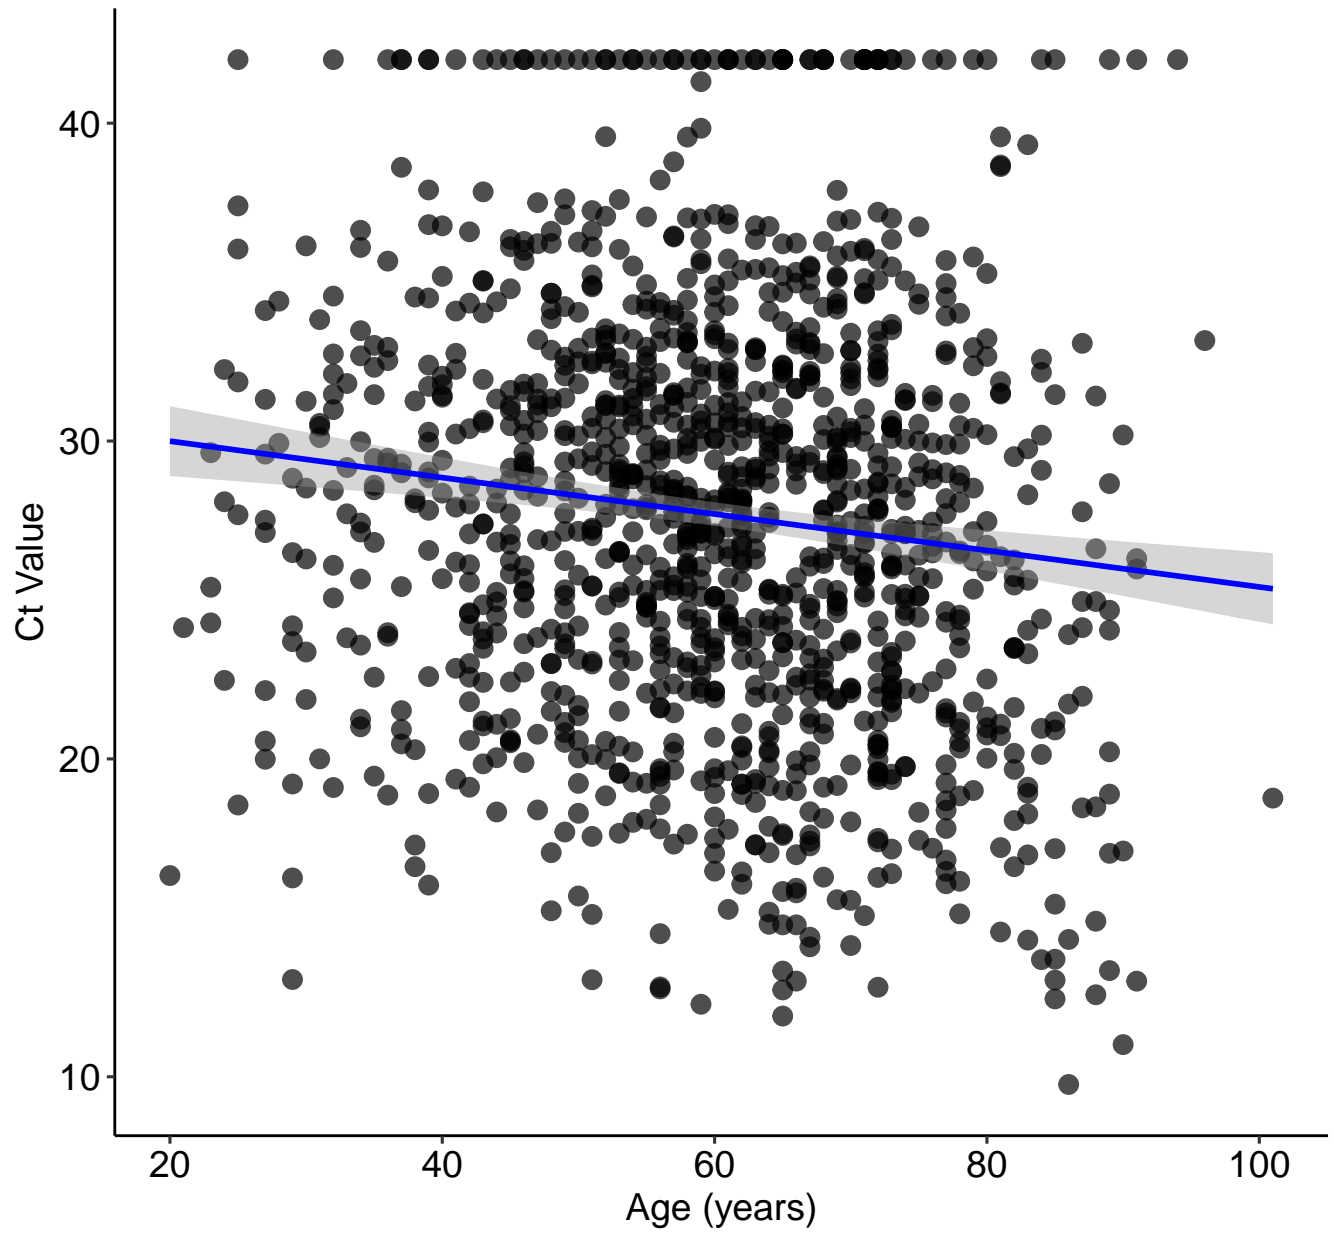

# Age Grouping 1

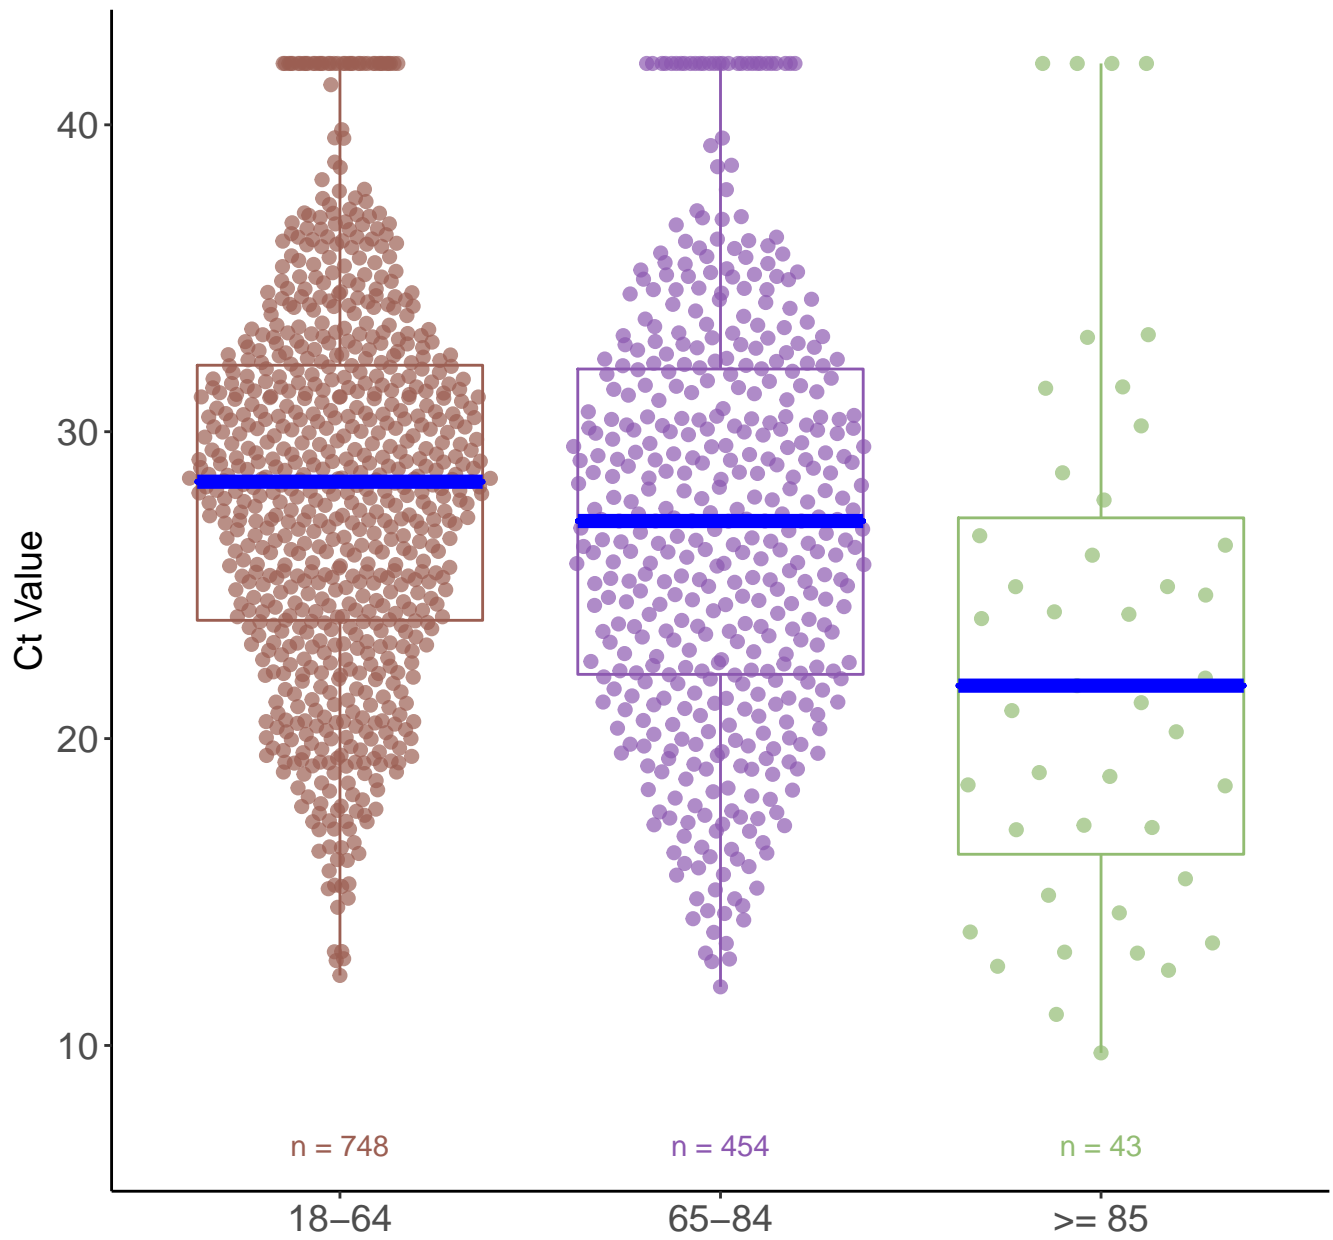

# Age Grouping 2

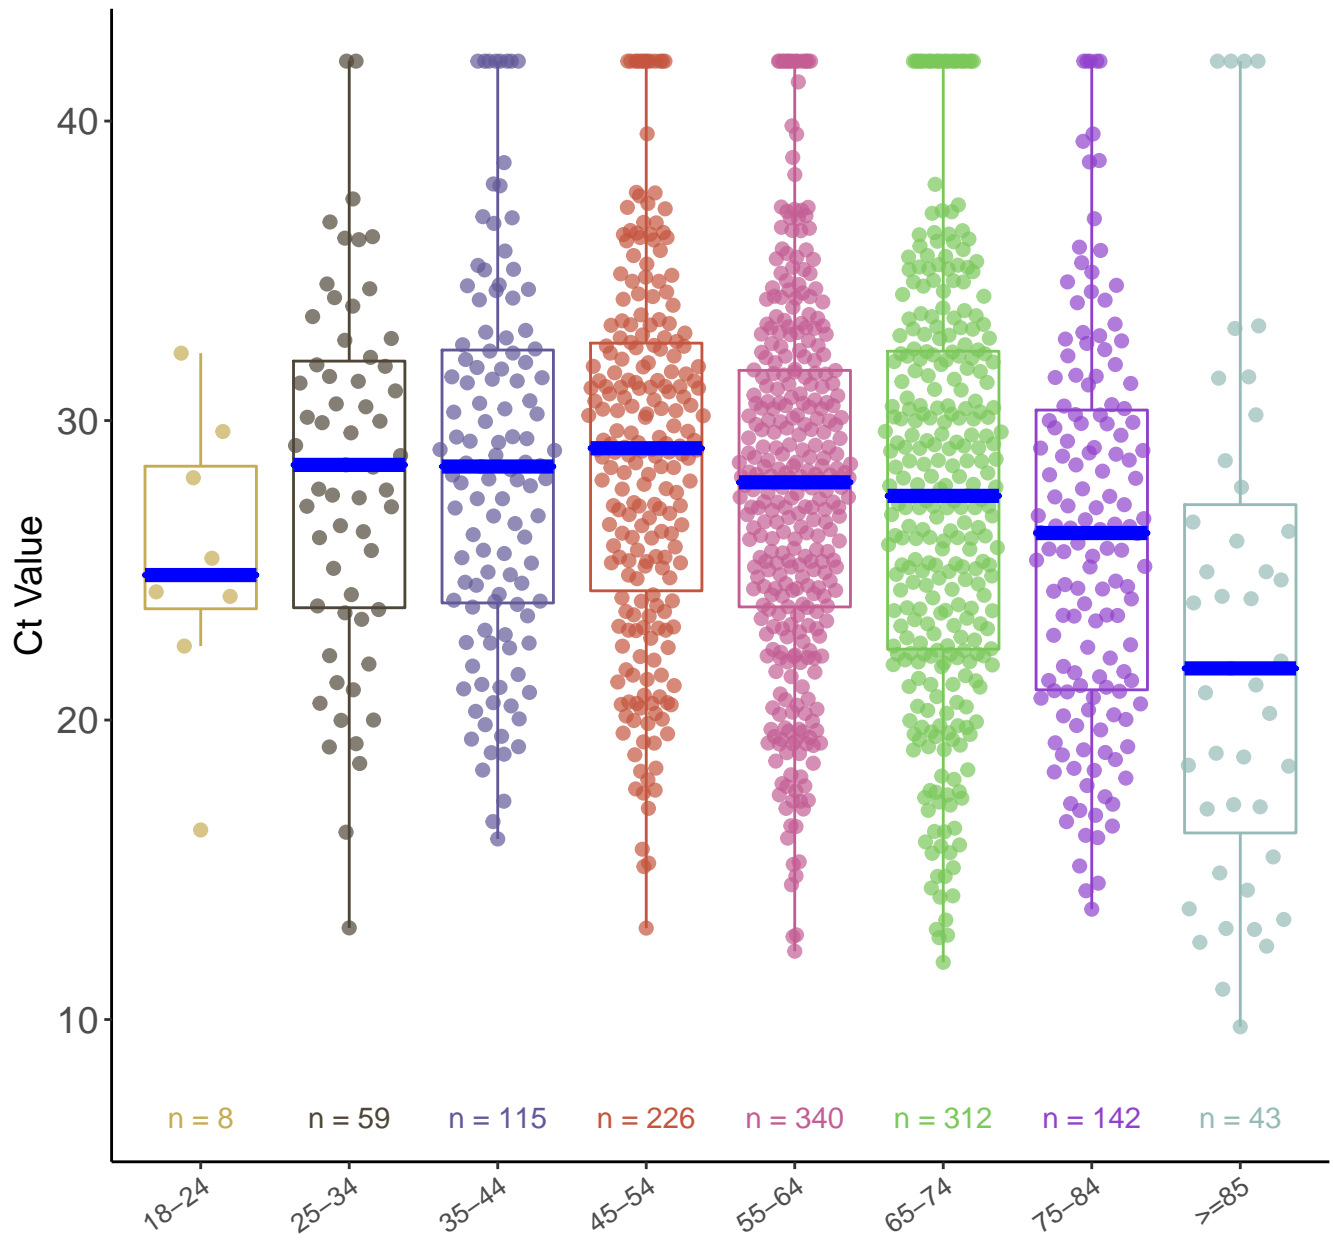

# Age Grouping 3

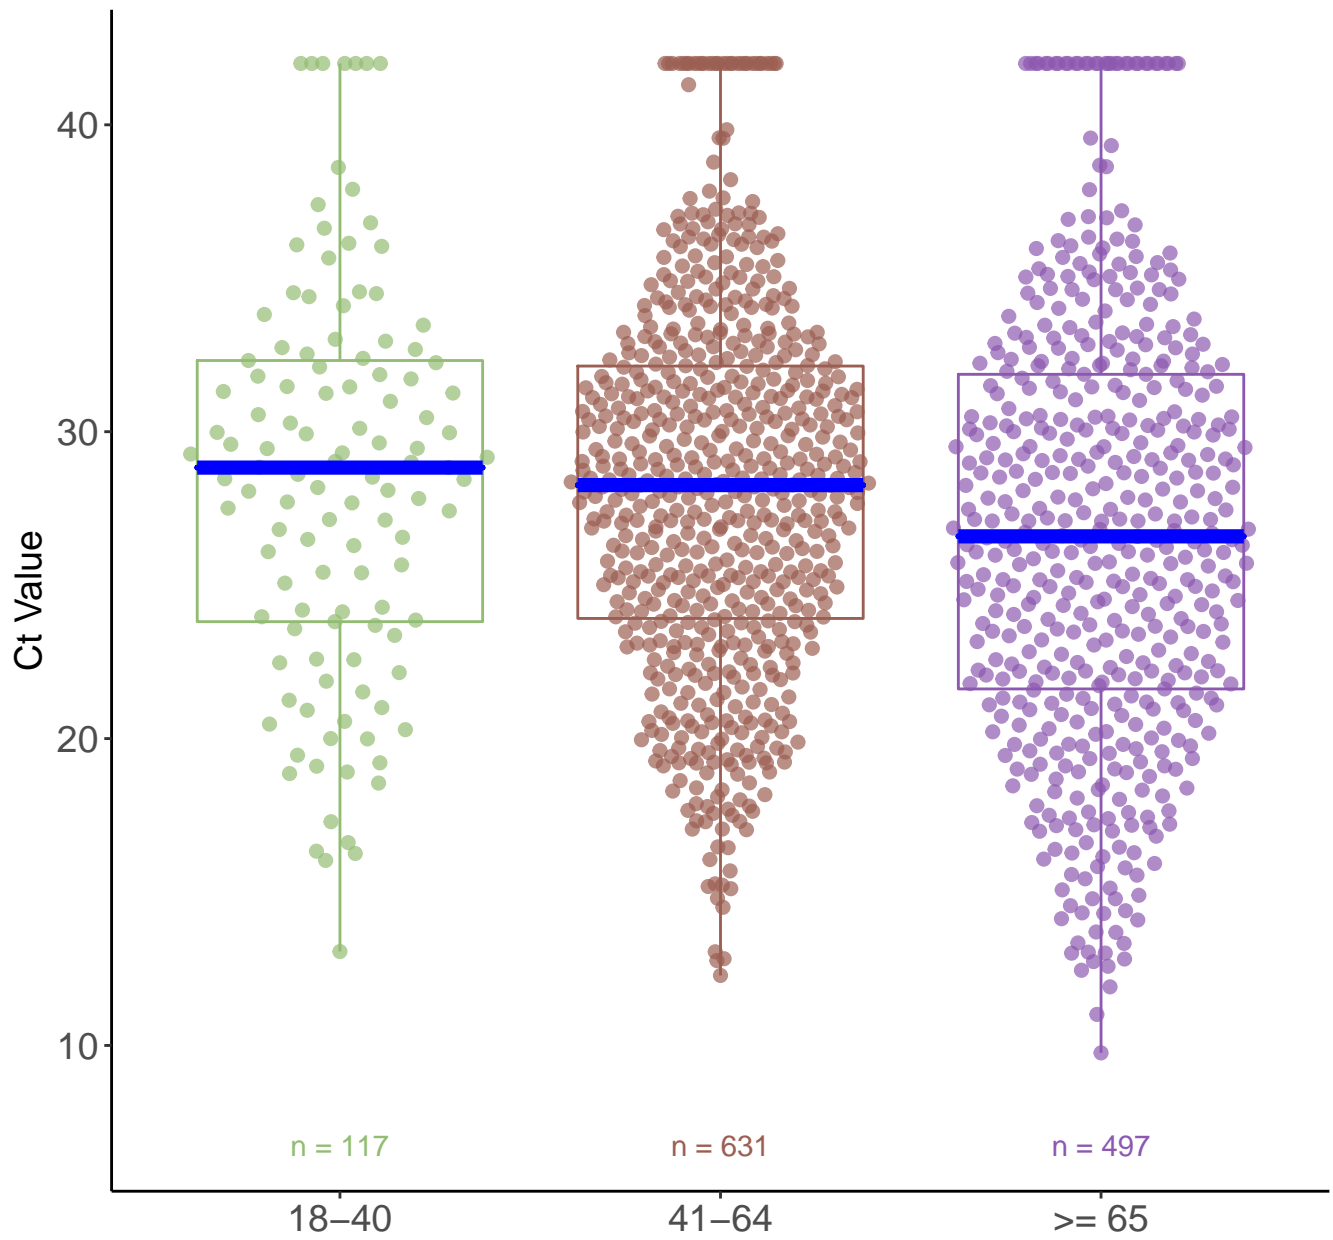

Sex

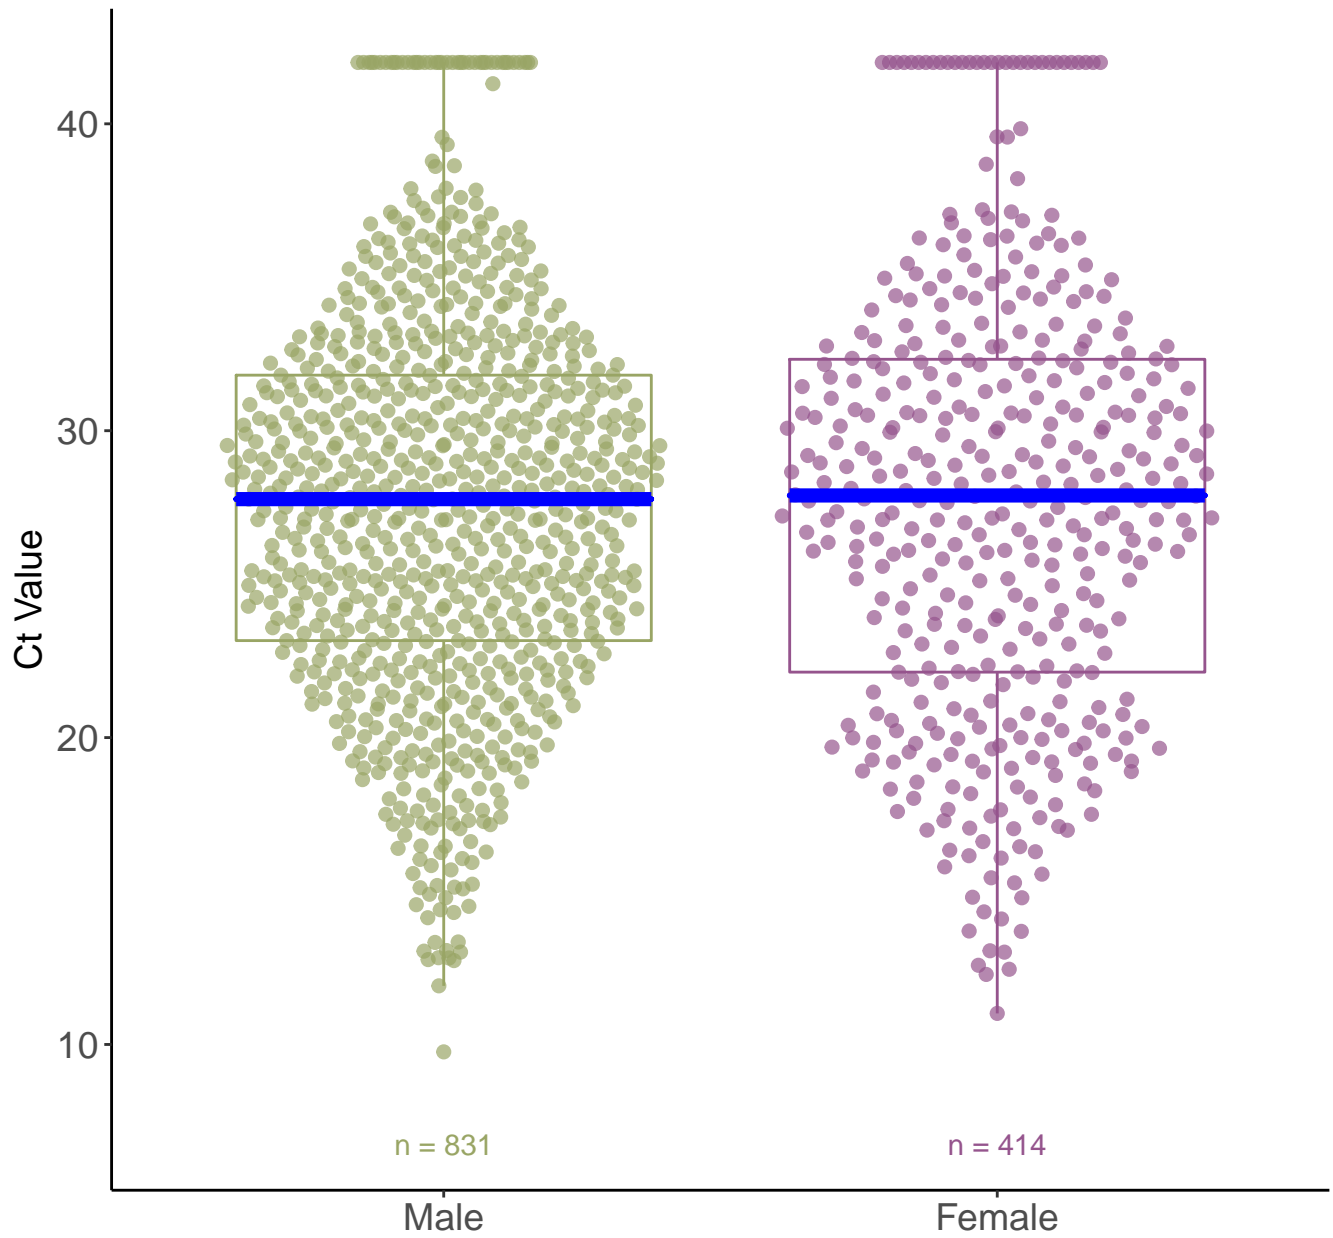

# Race

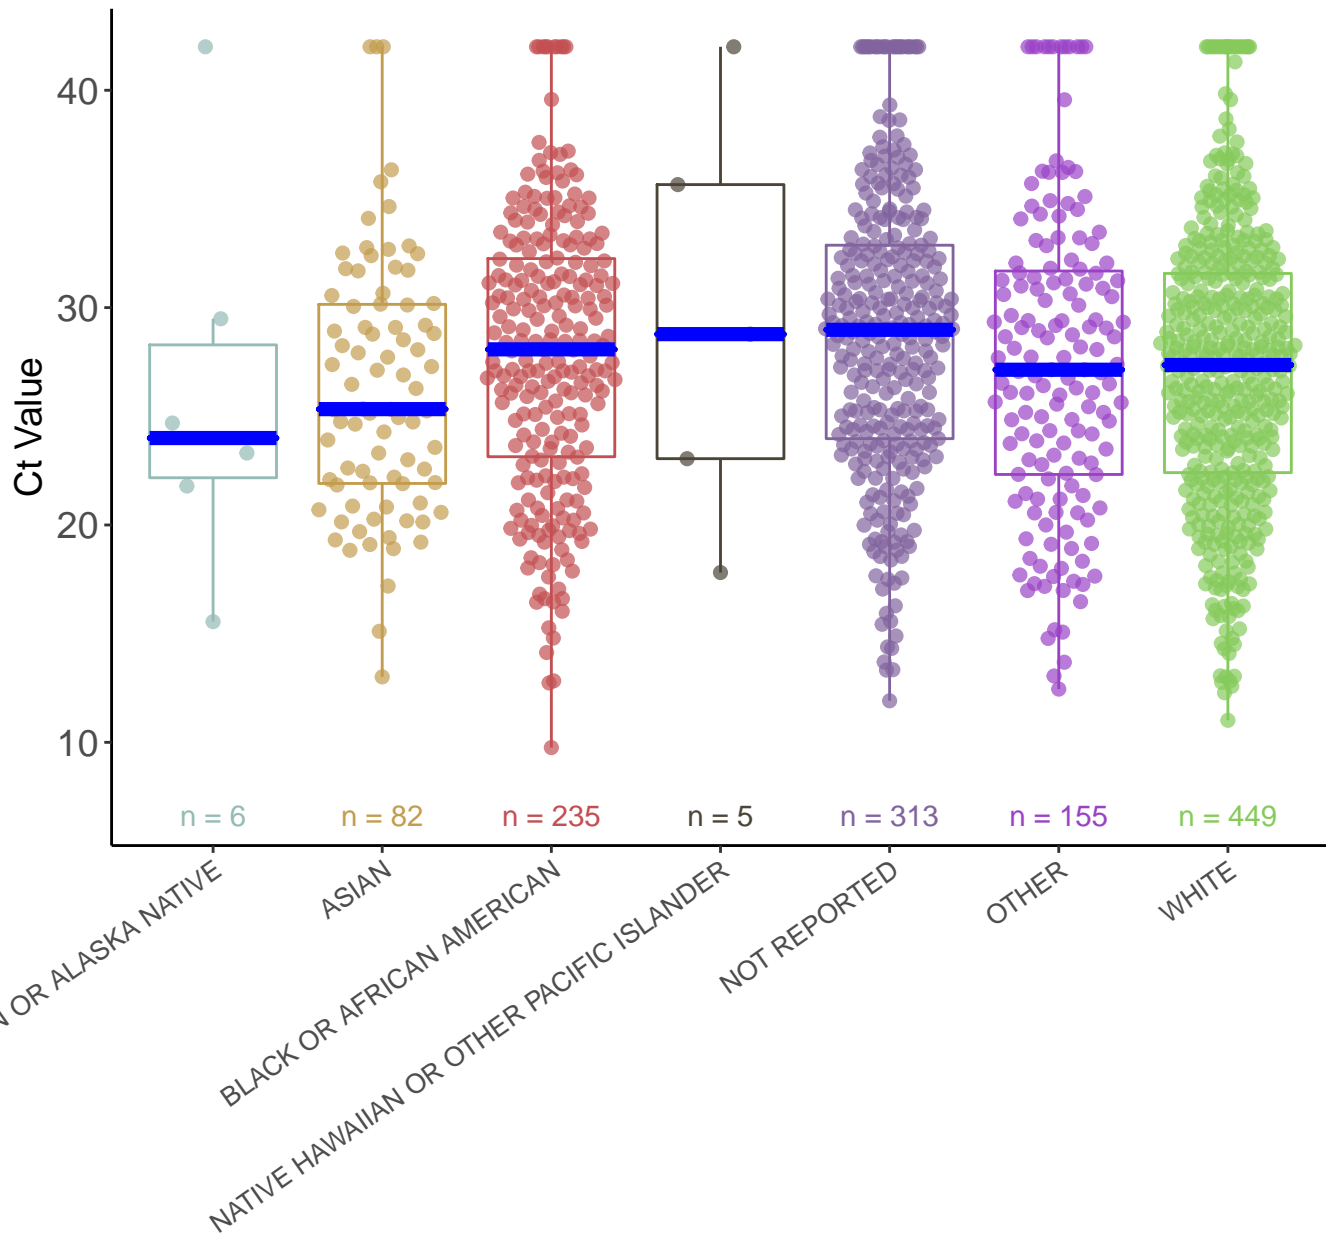

# Ethnicity

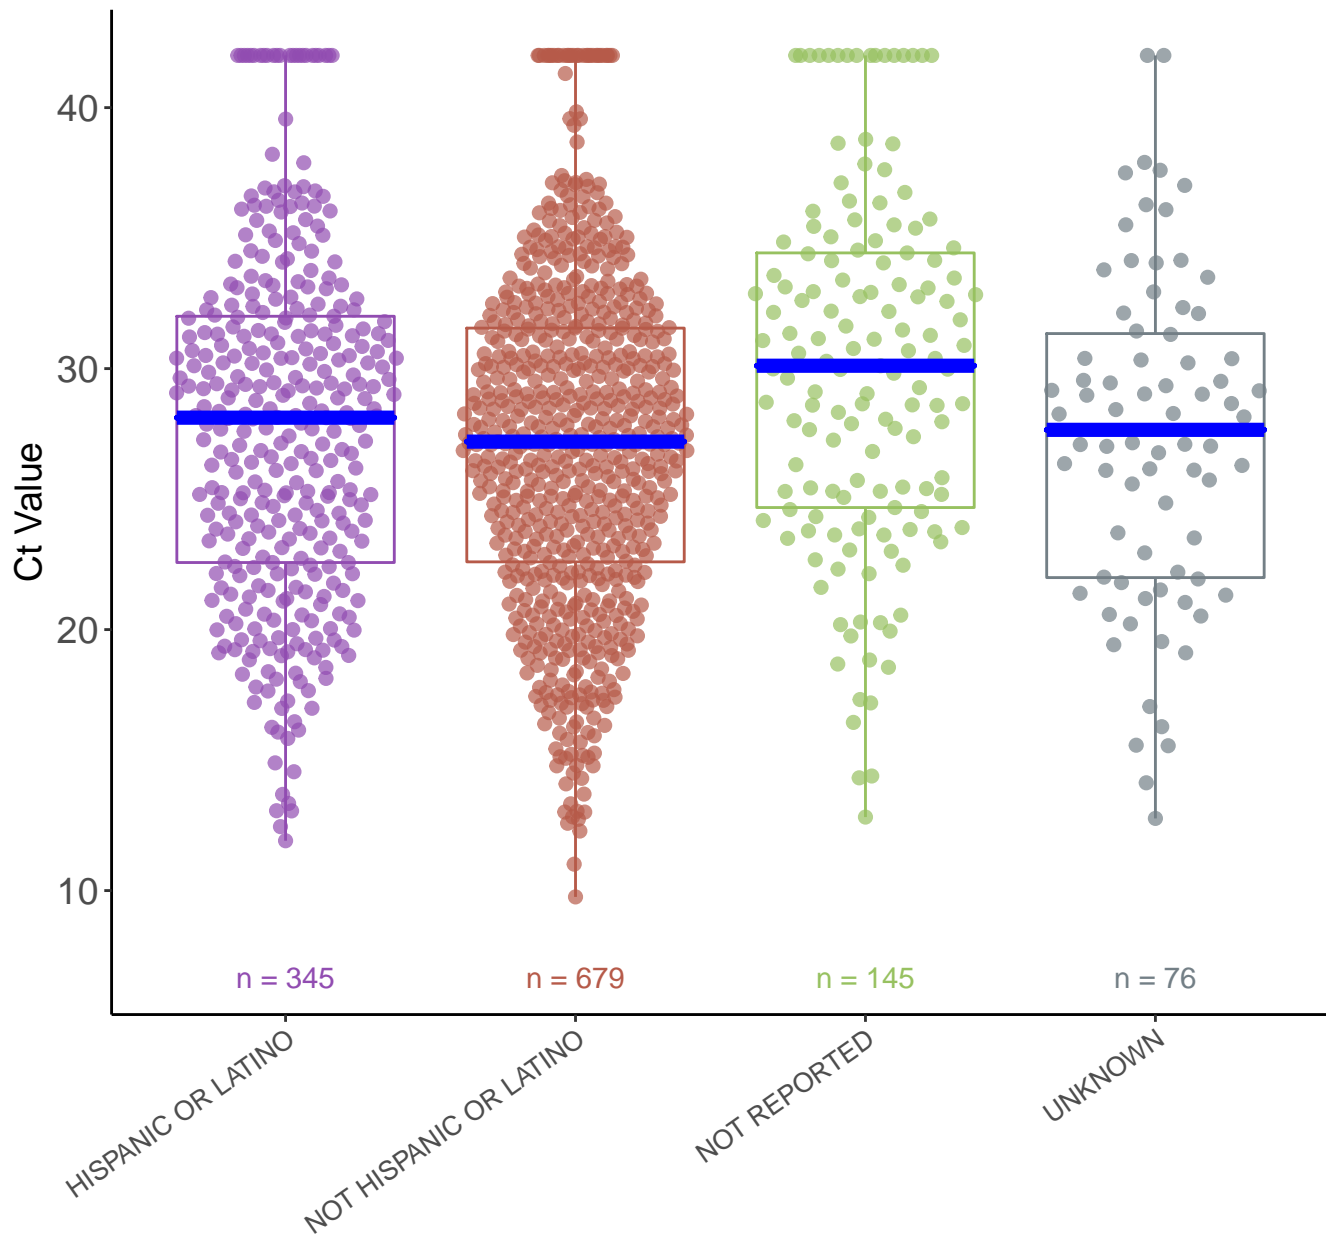

# Baseline Fever

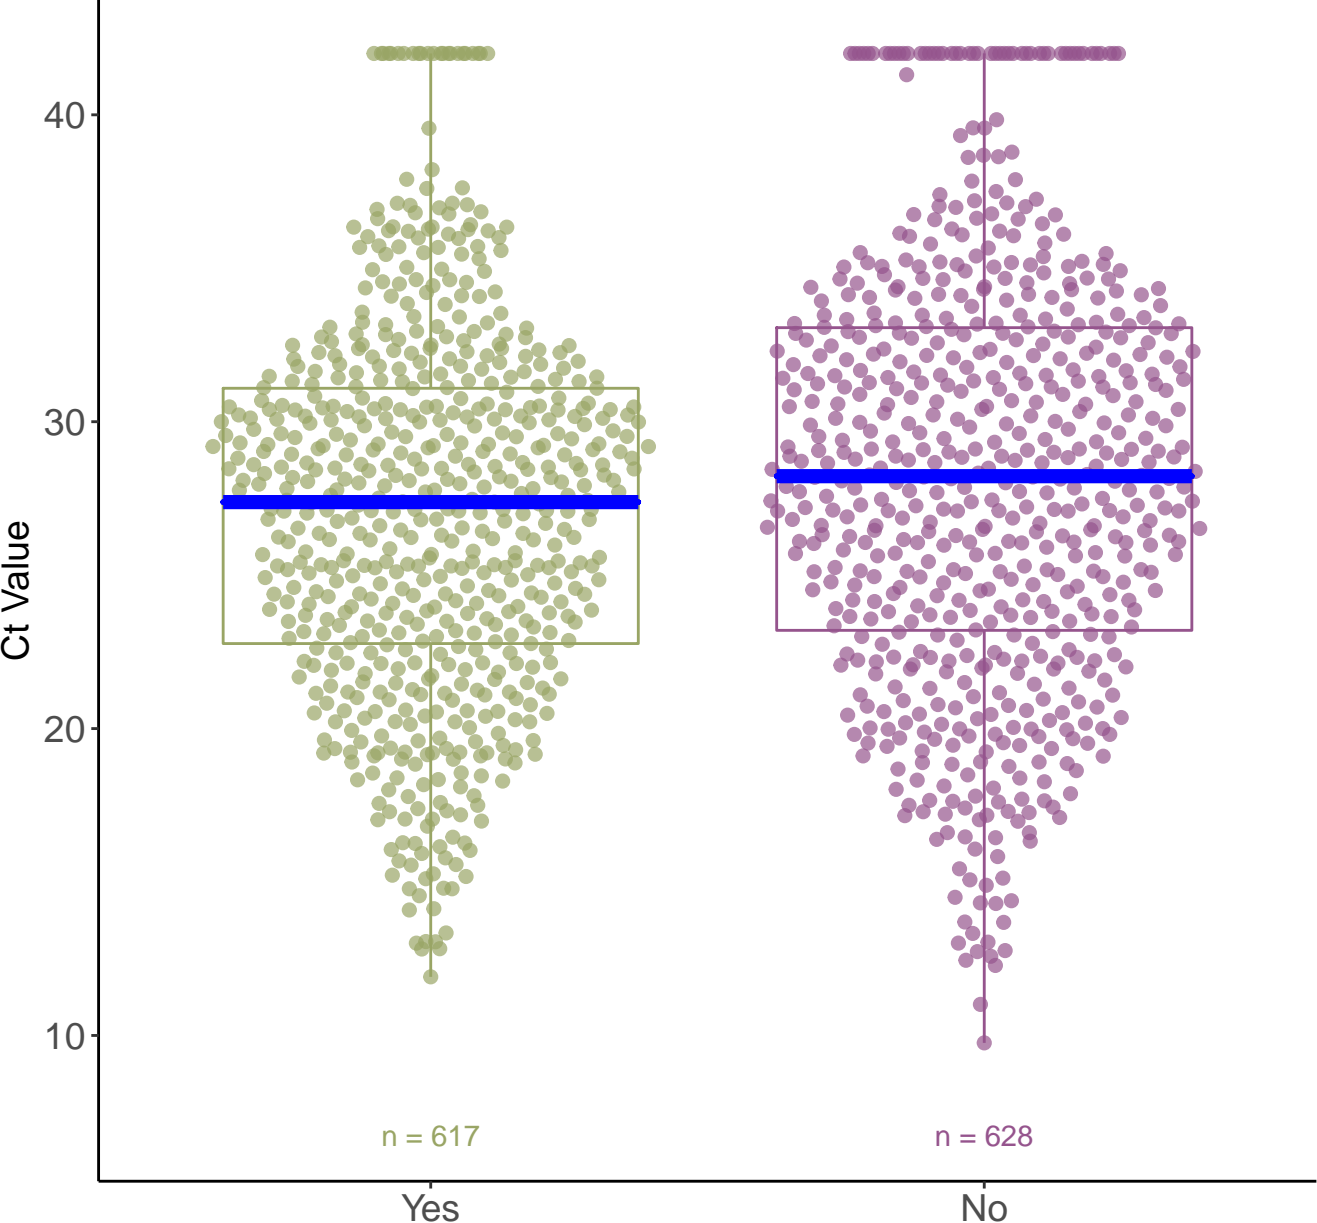



# Stratification of Disease Severity

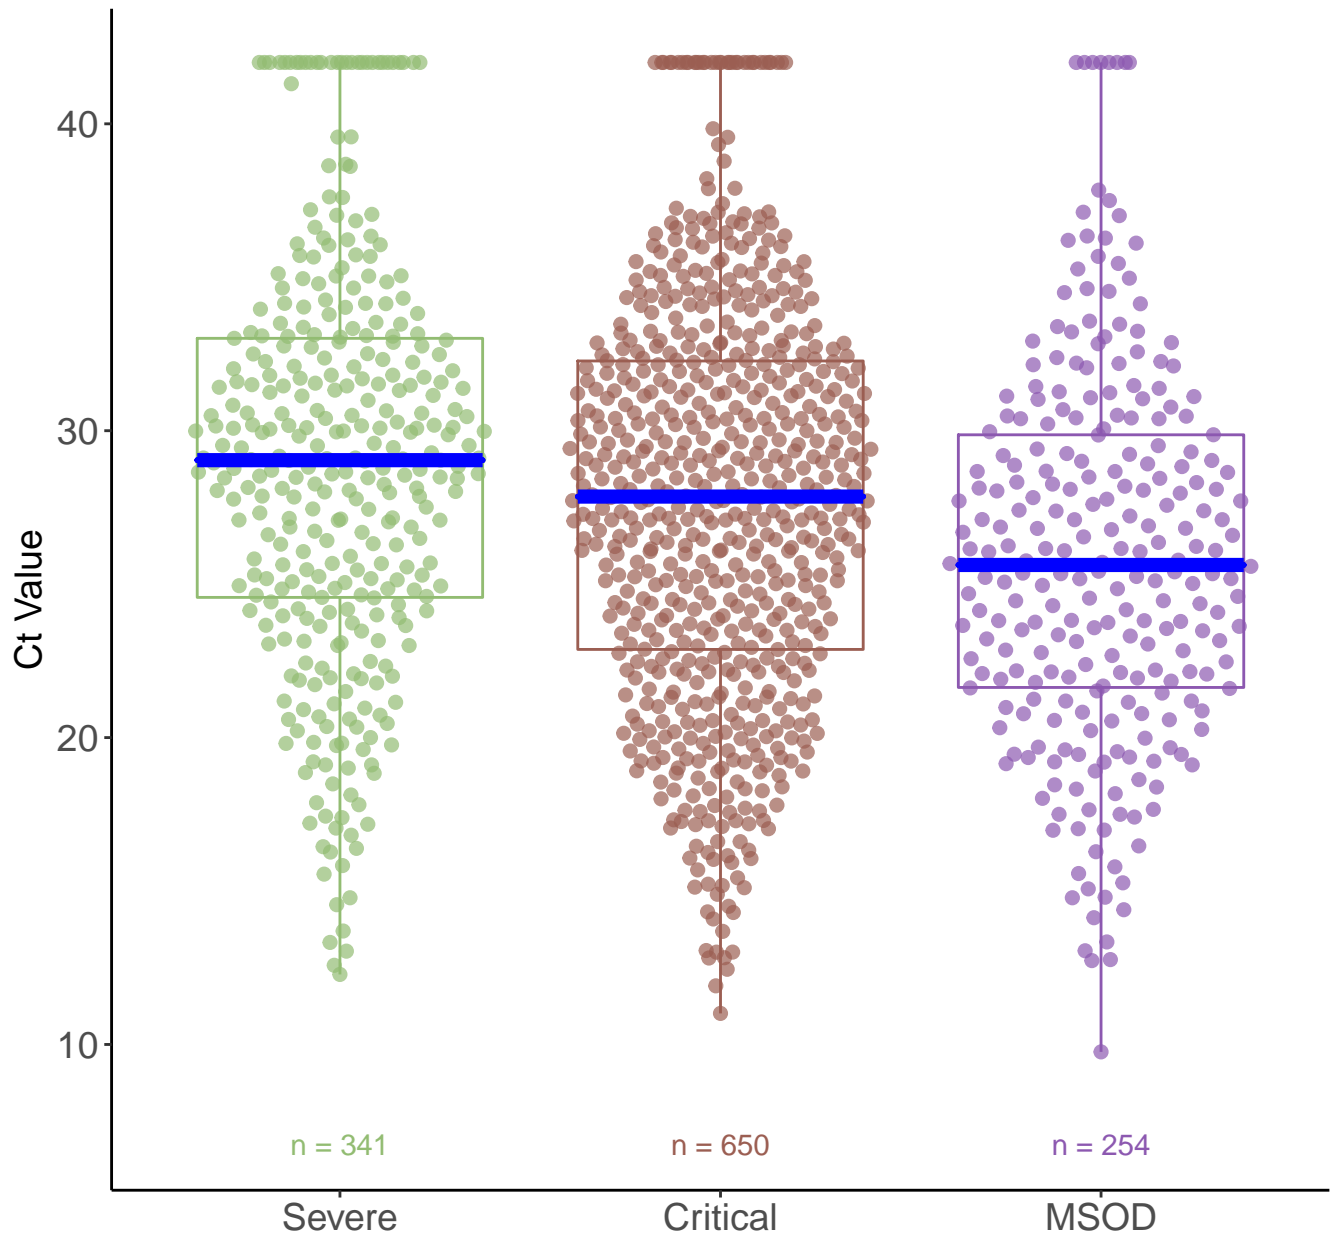

# Use of Steroids

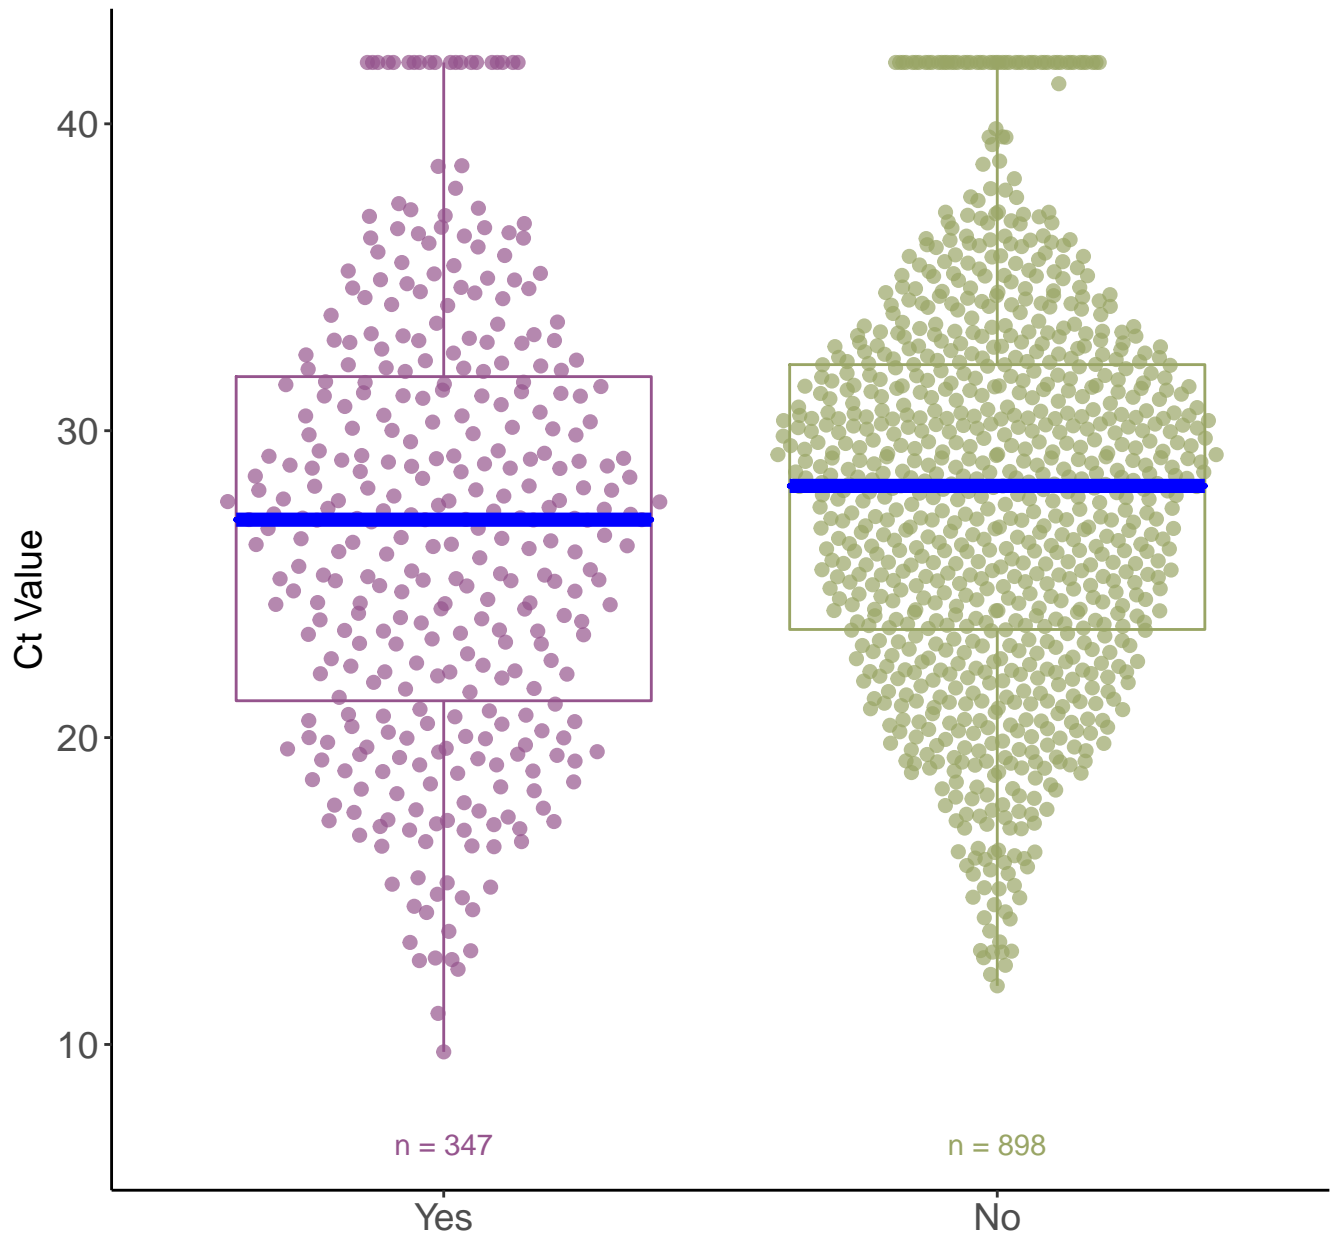

Duration of ICU Stay Until Randomization

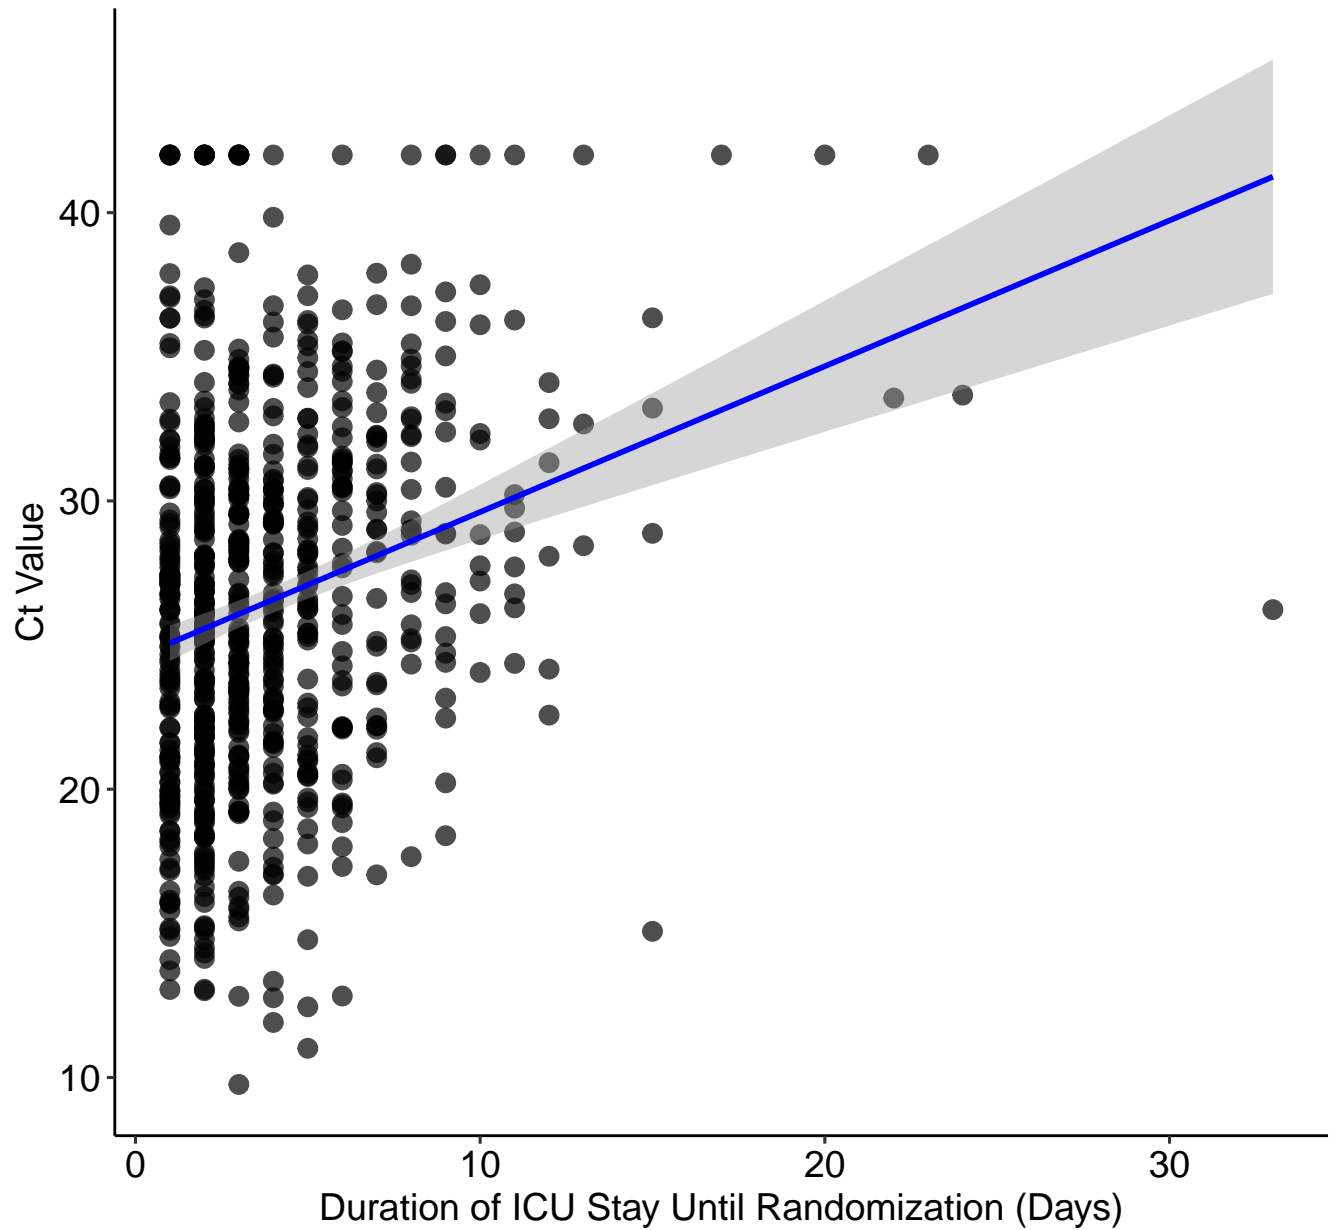

Duration from COVID-19 positive test to Enrollment

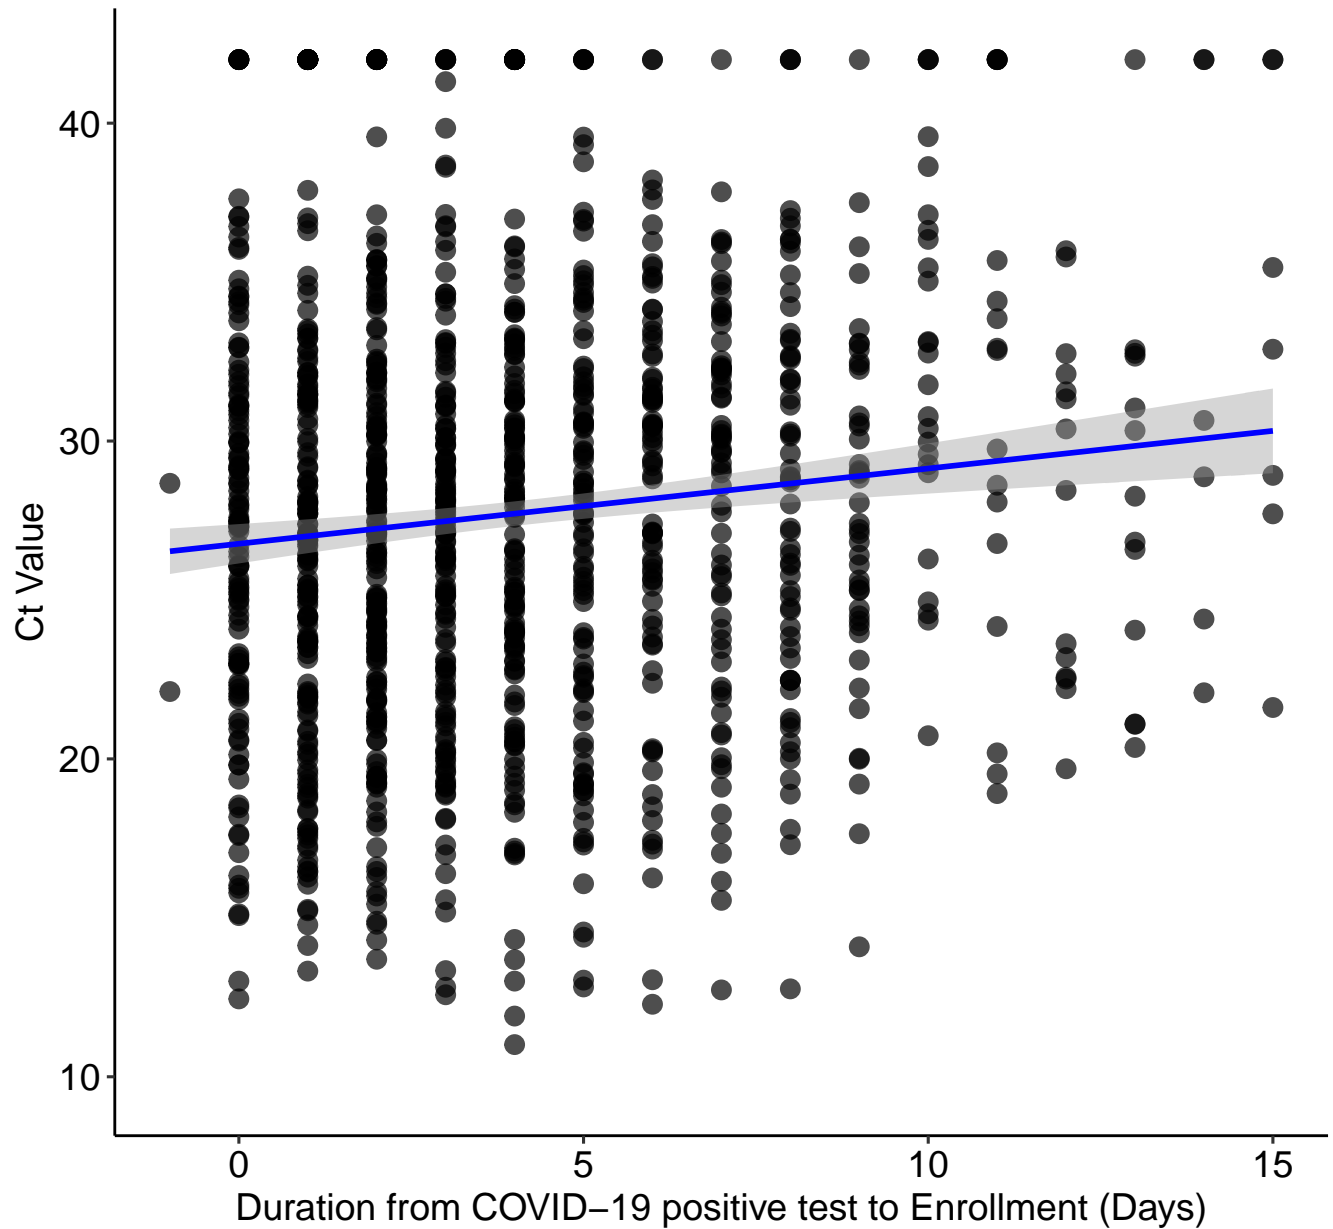

# Duration of Pneumonia prior to Baseline

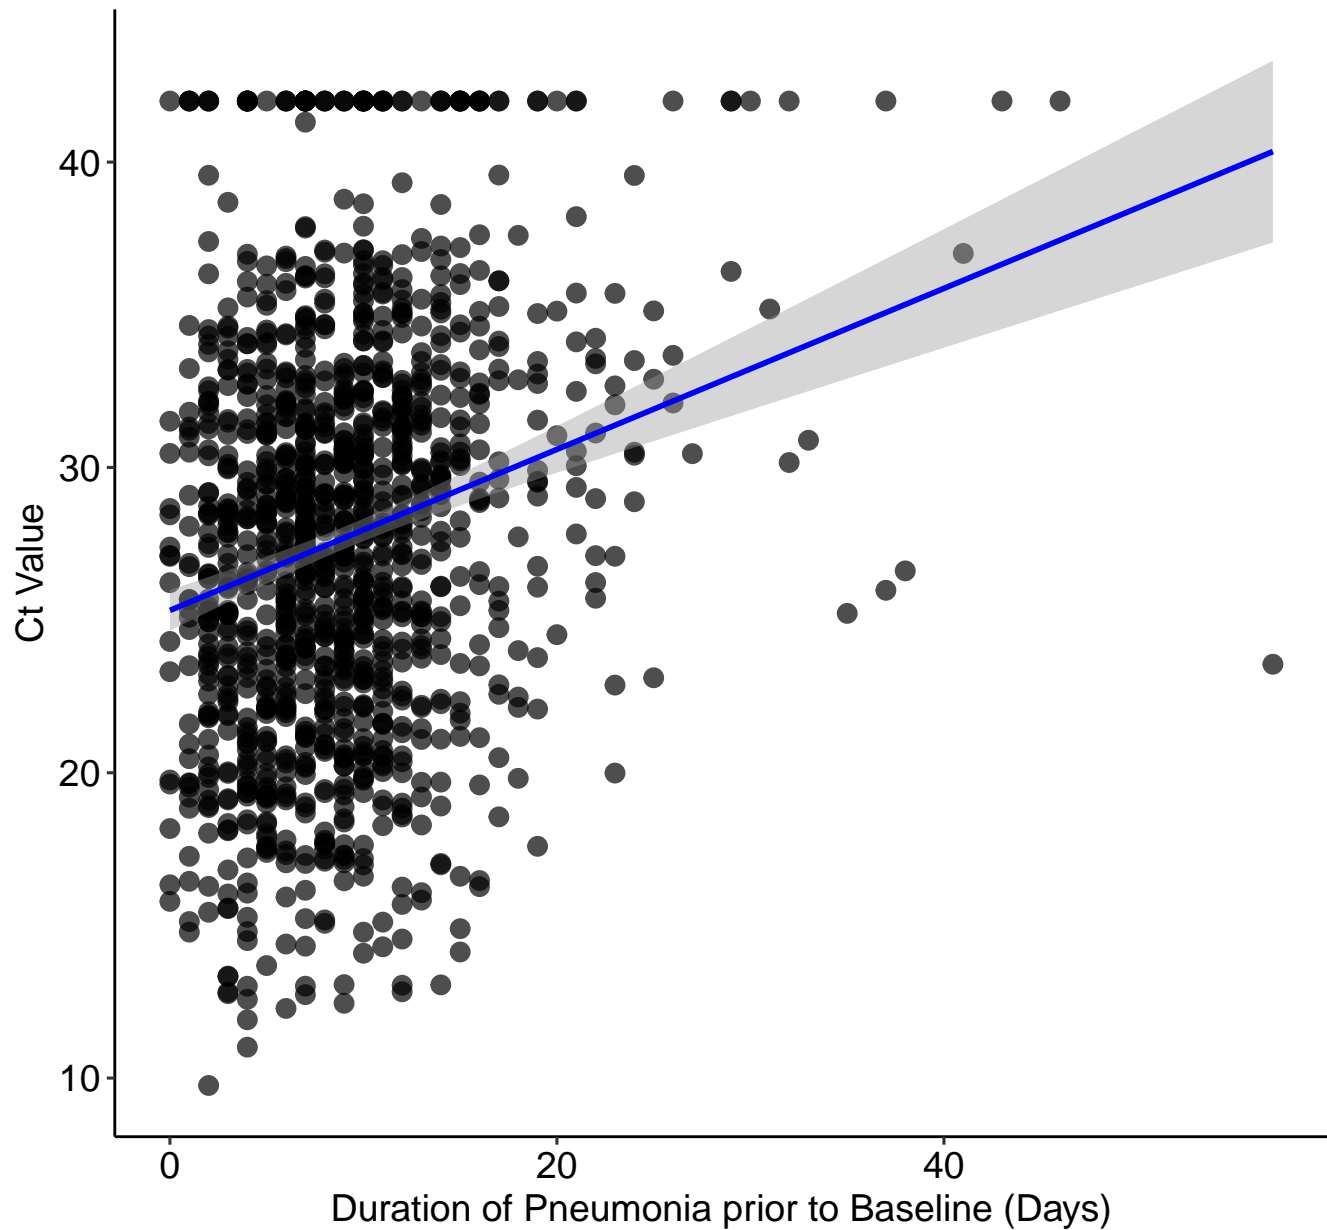

# Body Mass Index

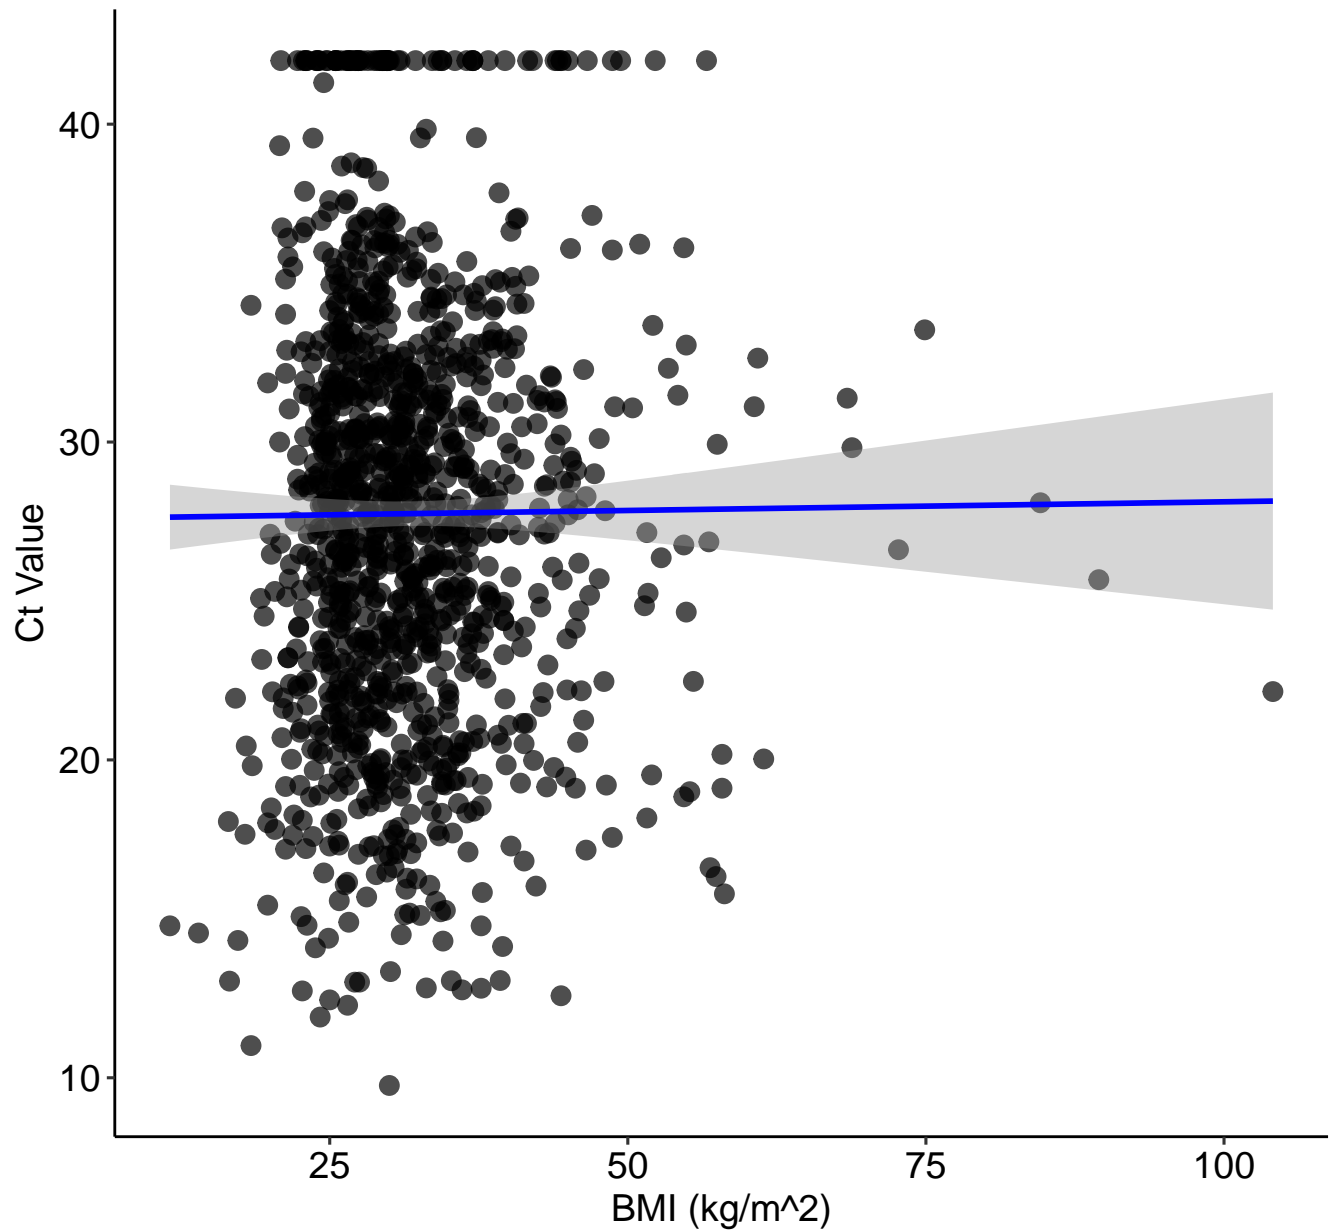

# Obesity

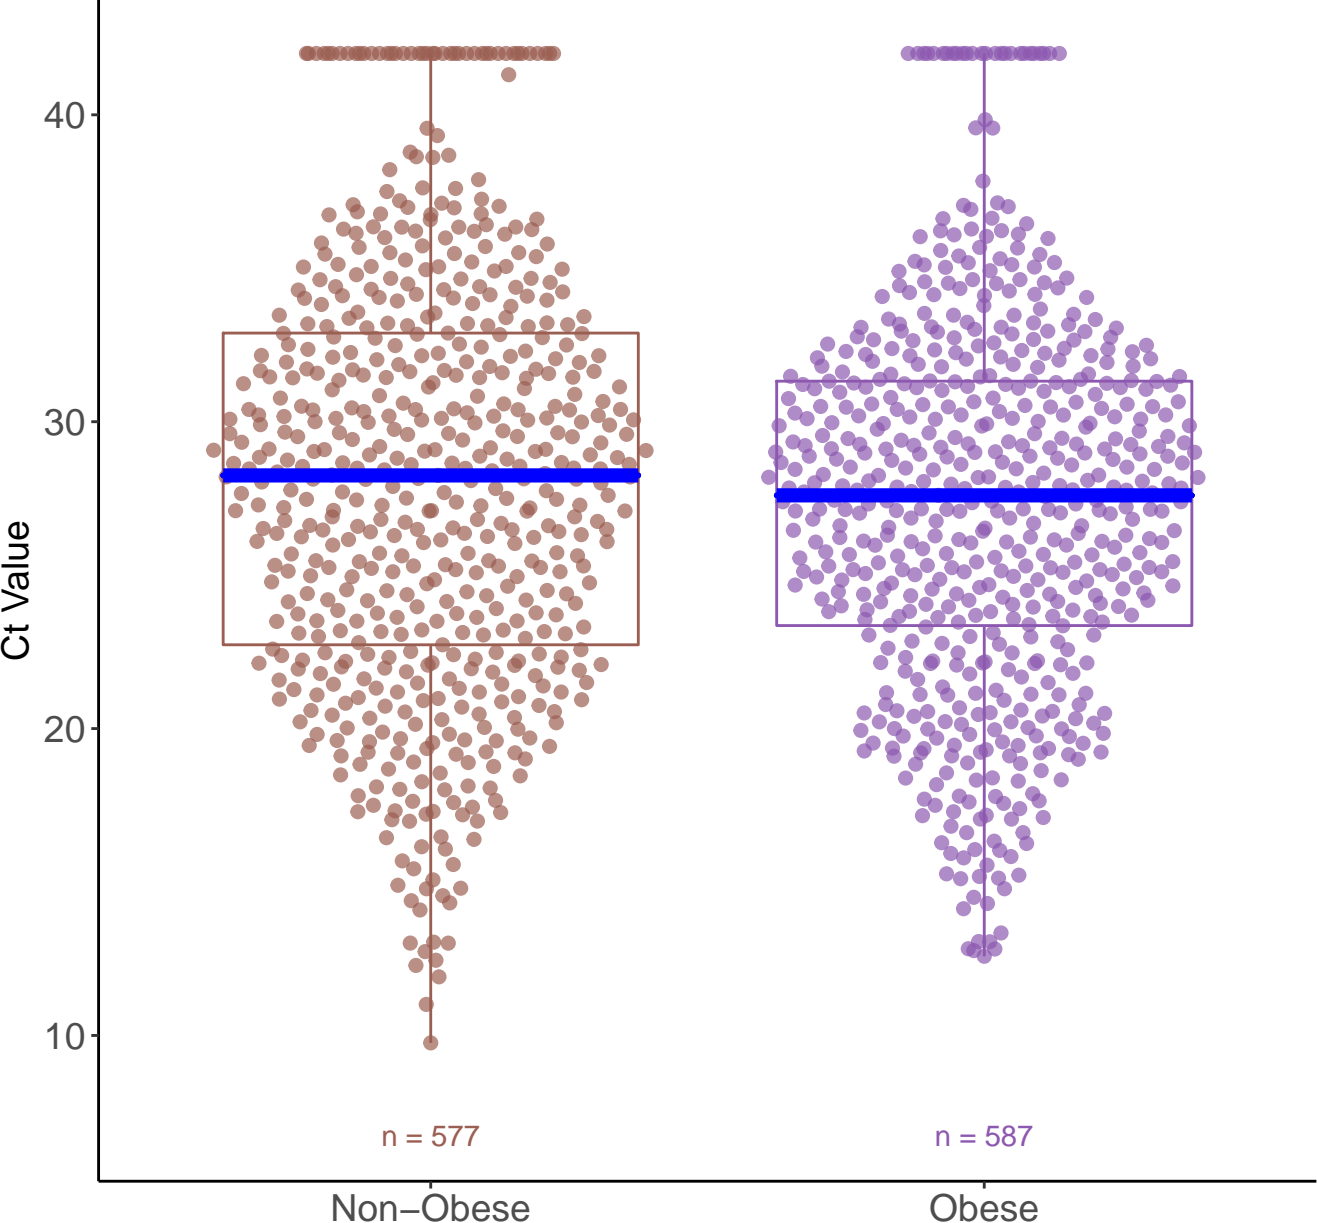

# Baseline Body Temperature (Oral)

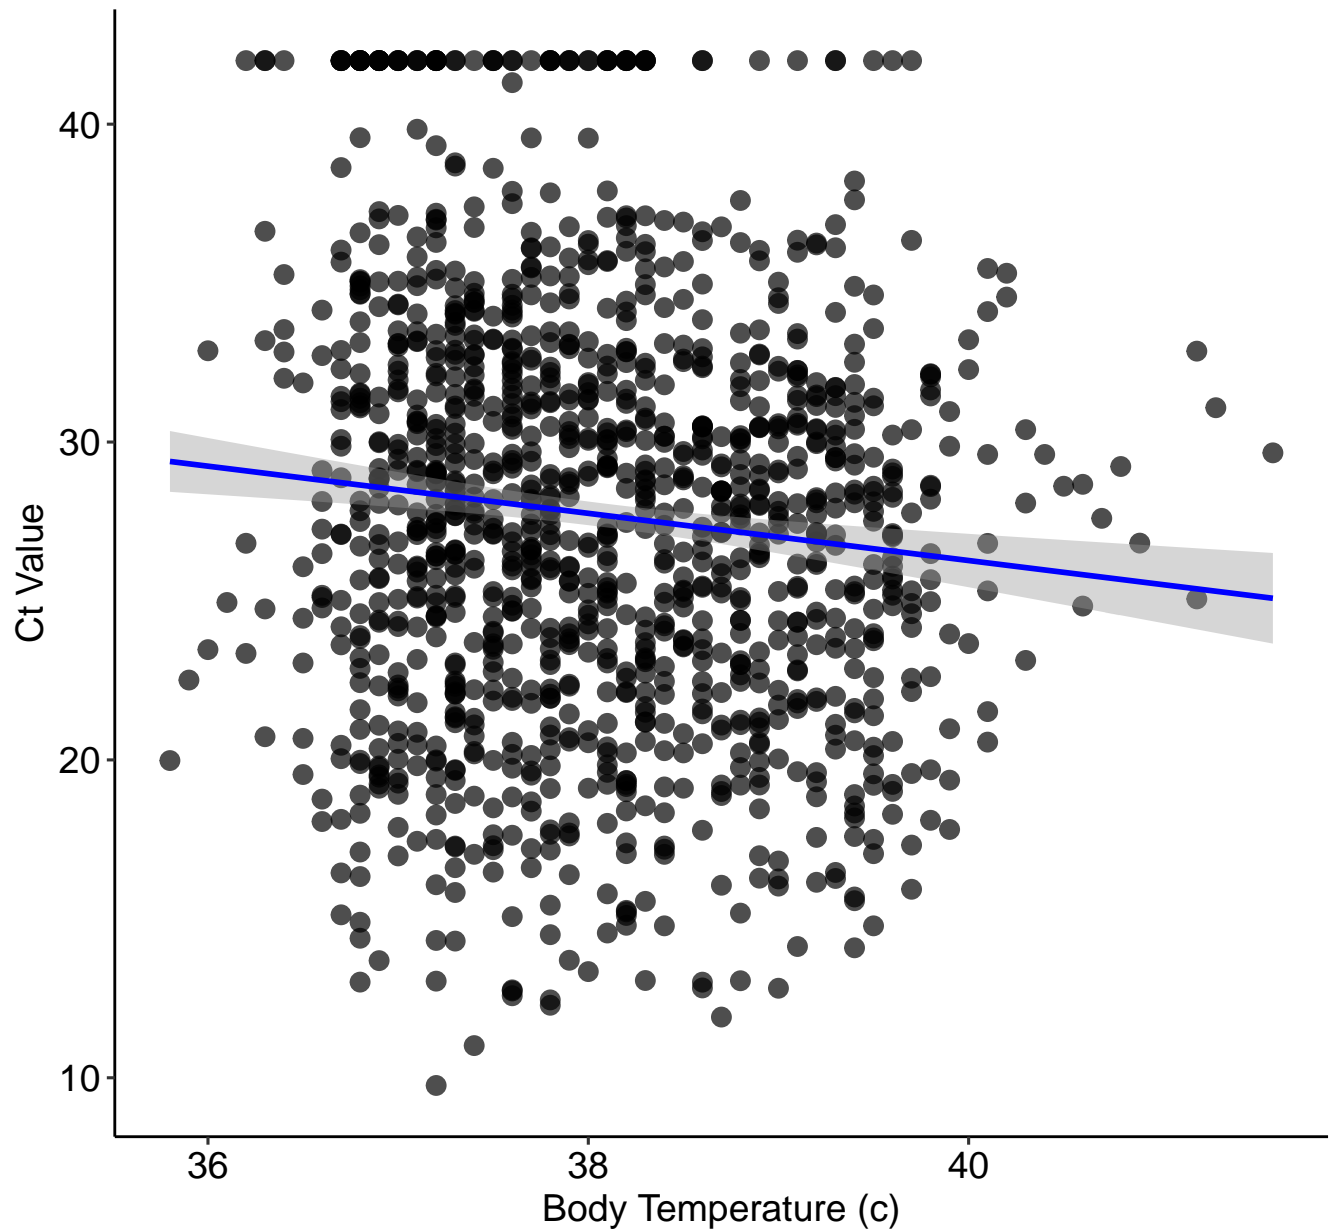



# Hypertension

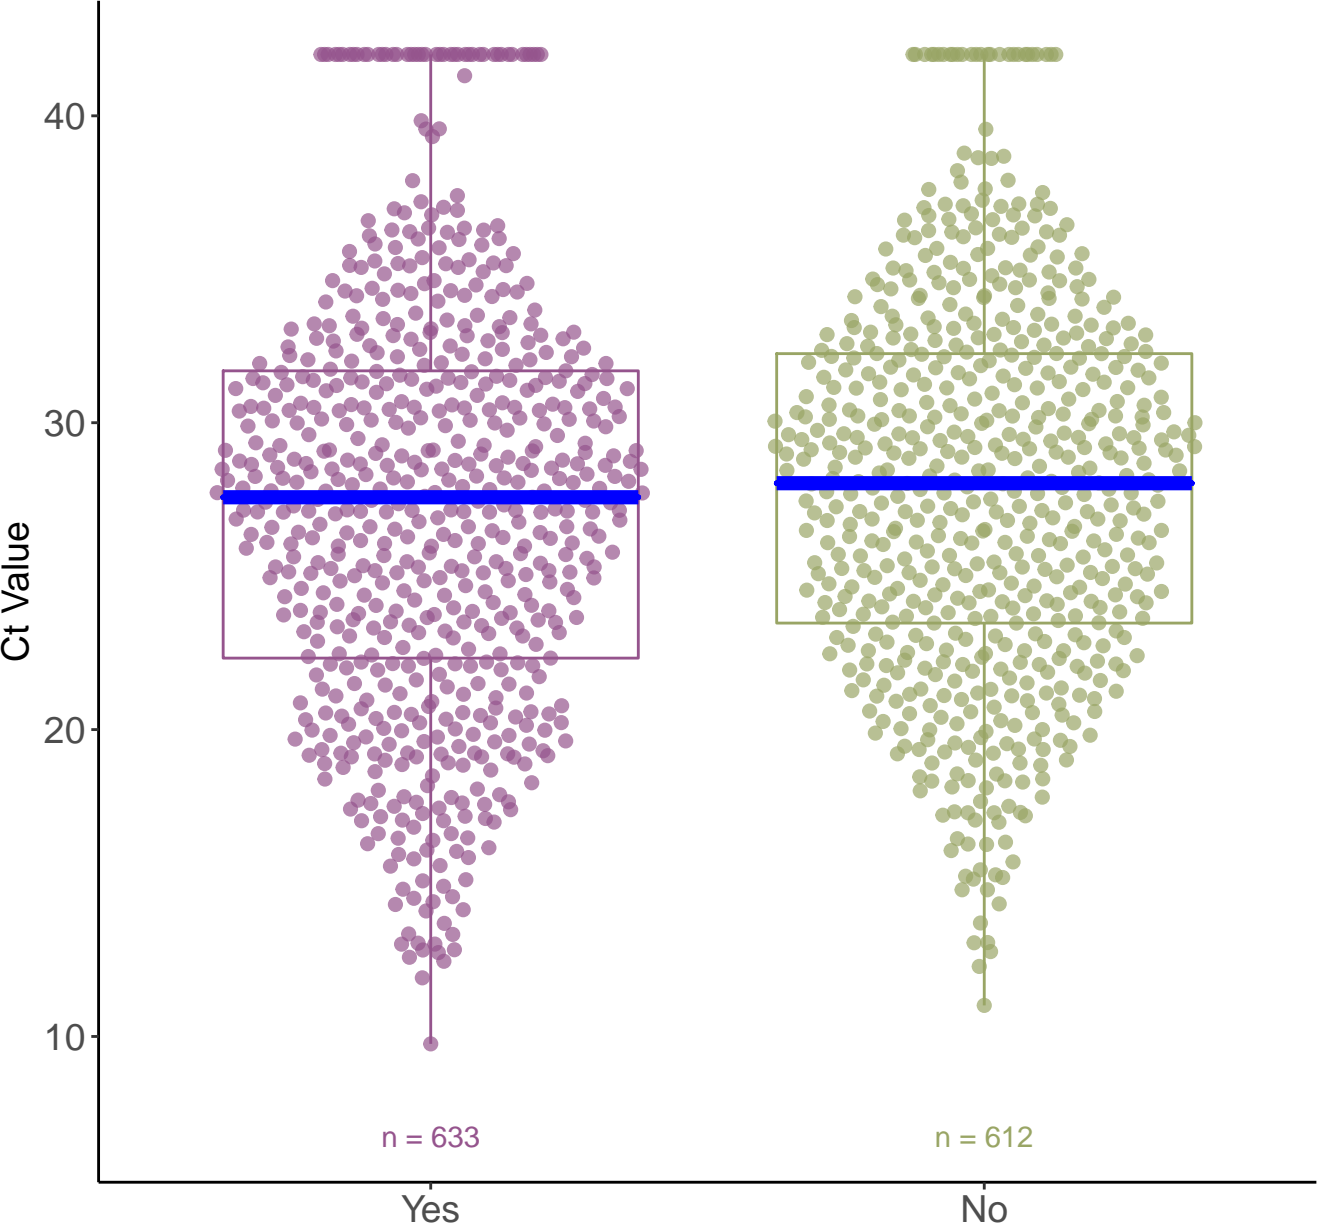

# Diabetes

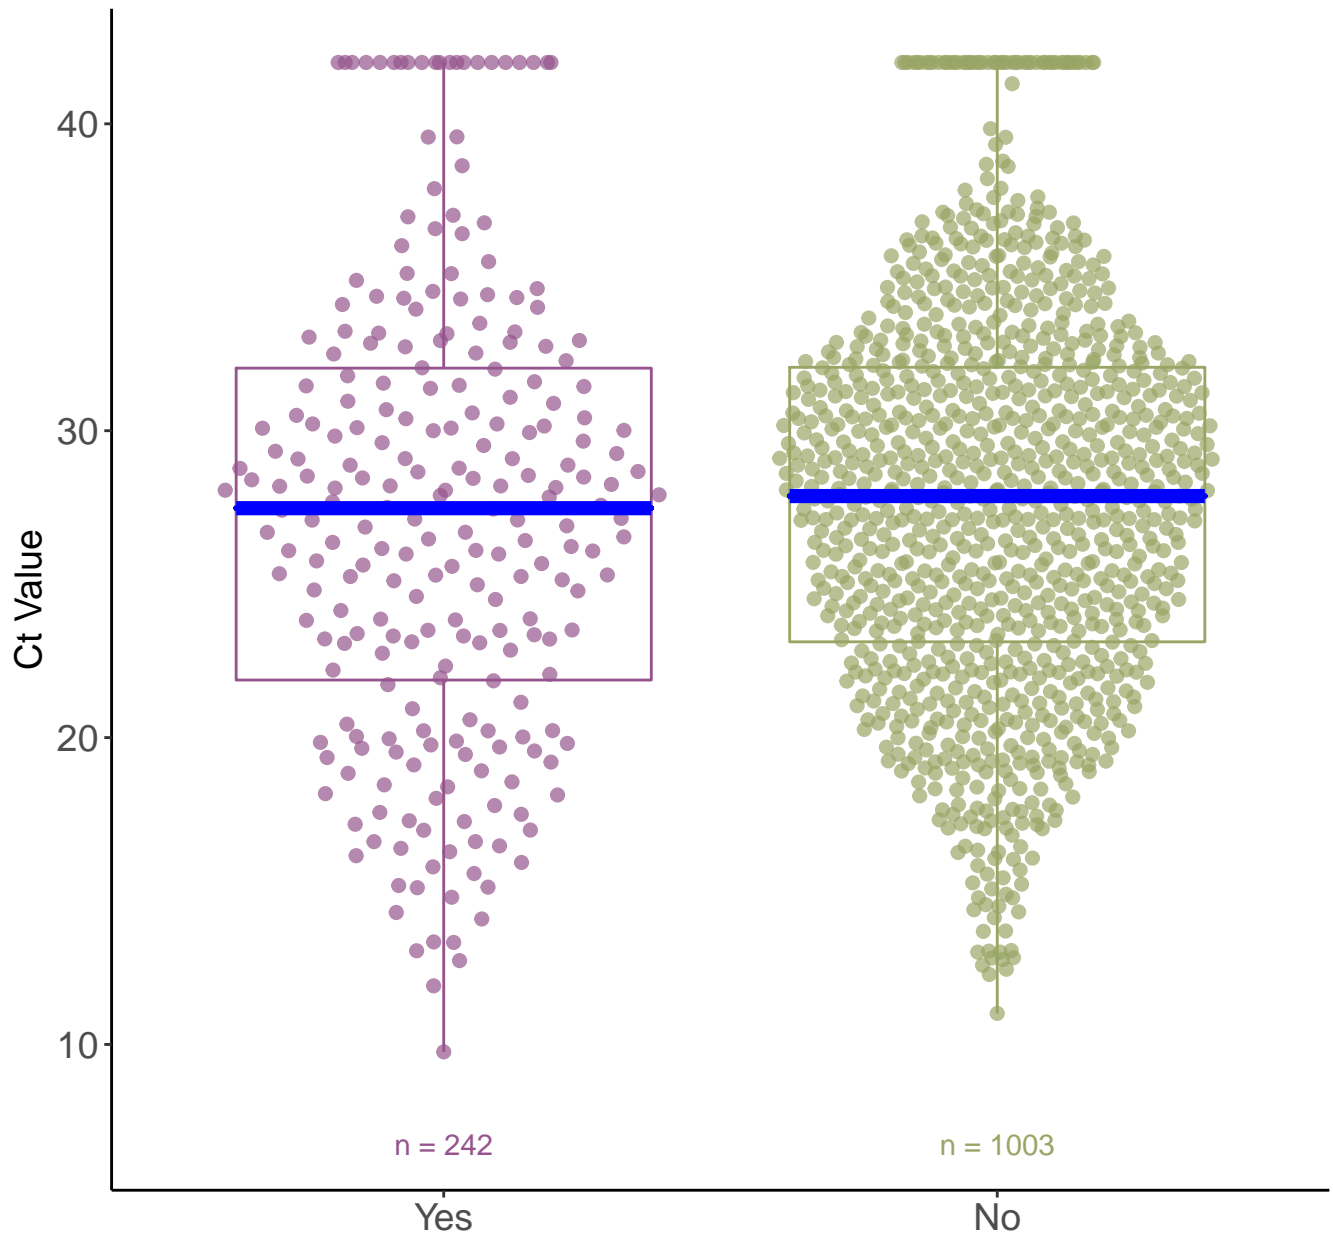

Total Number of Days with Fever (during the study)

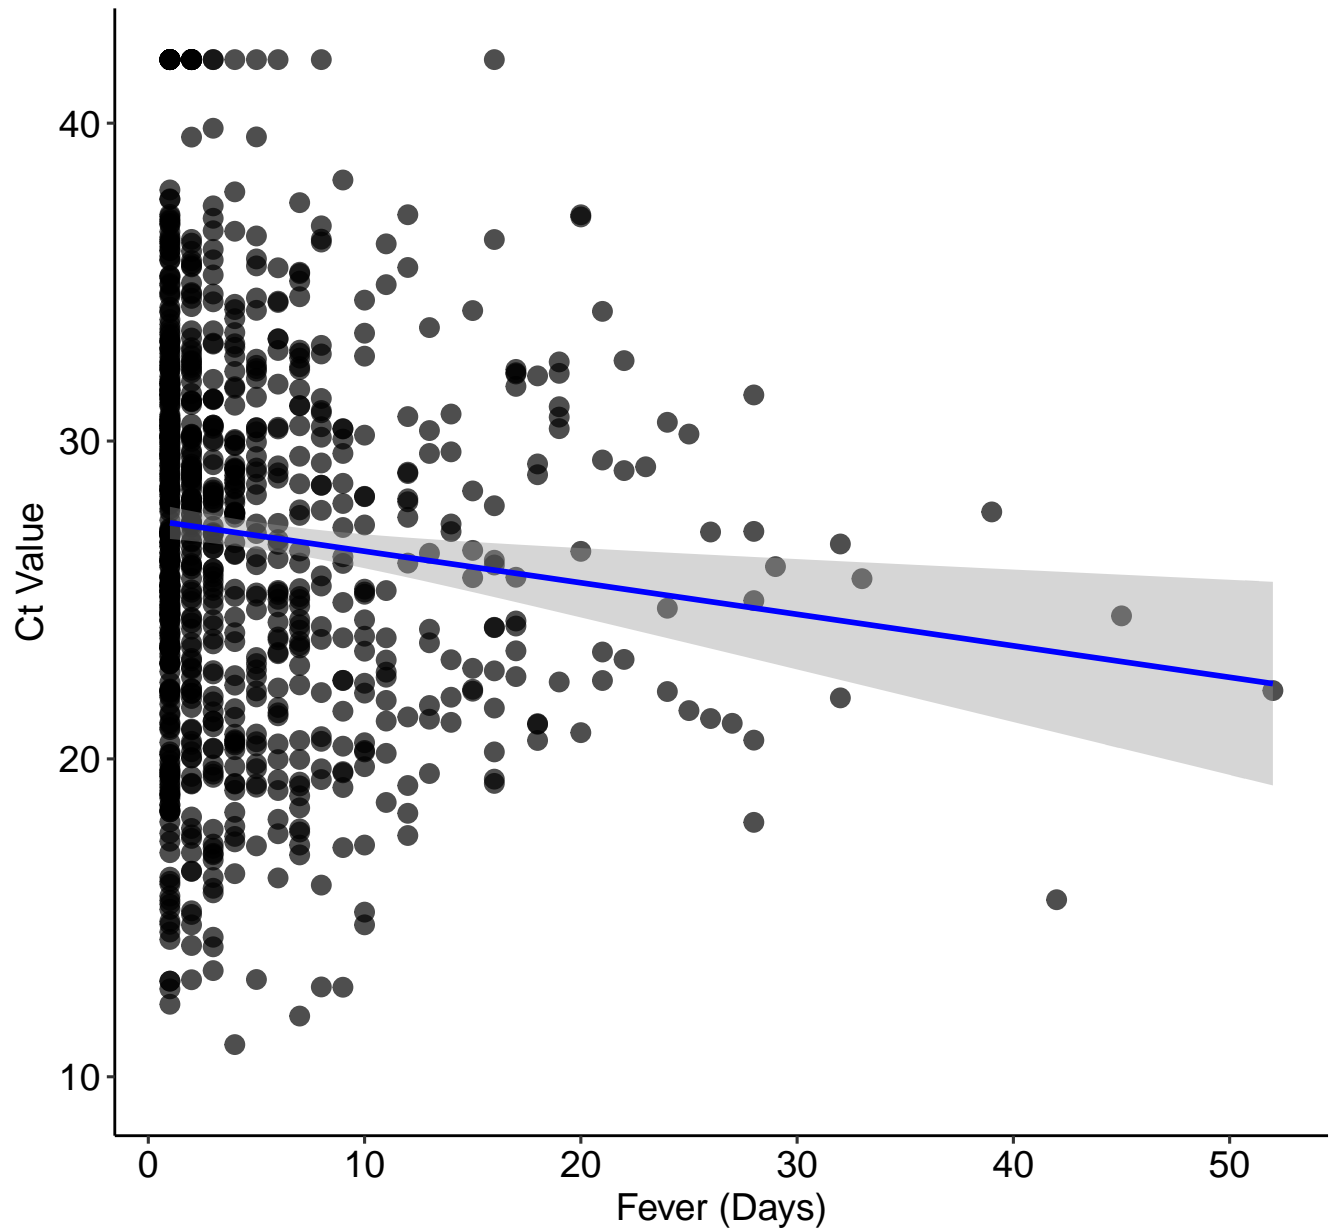

Total Number of Days of Resp Rate >24 bpm (during the study)

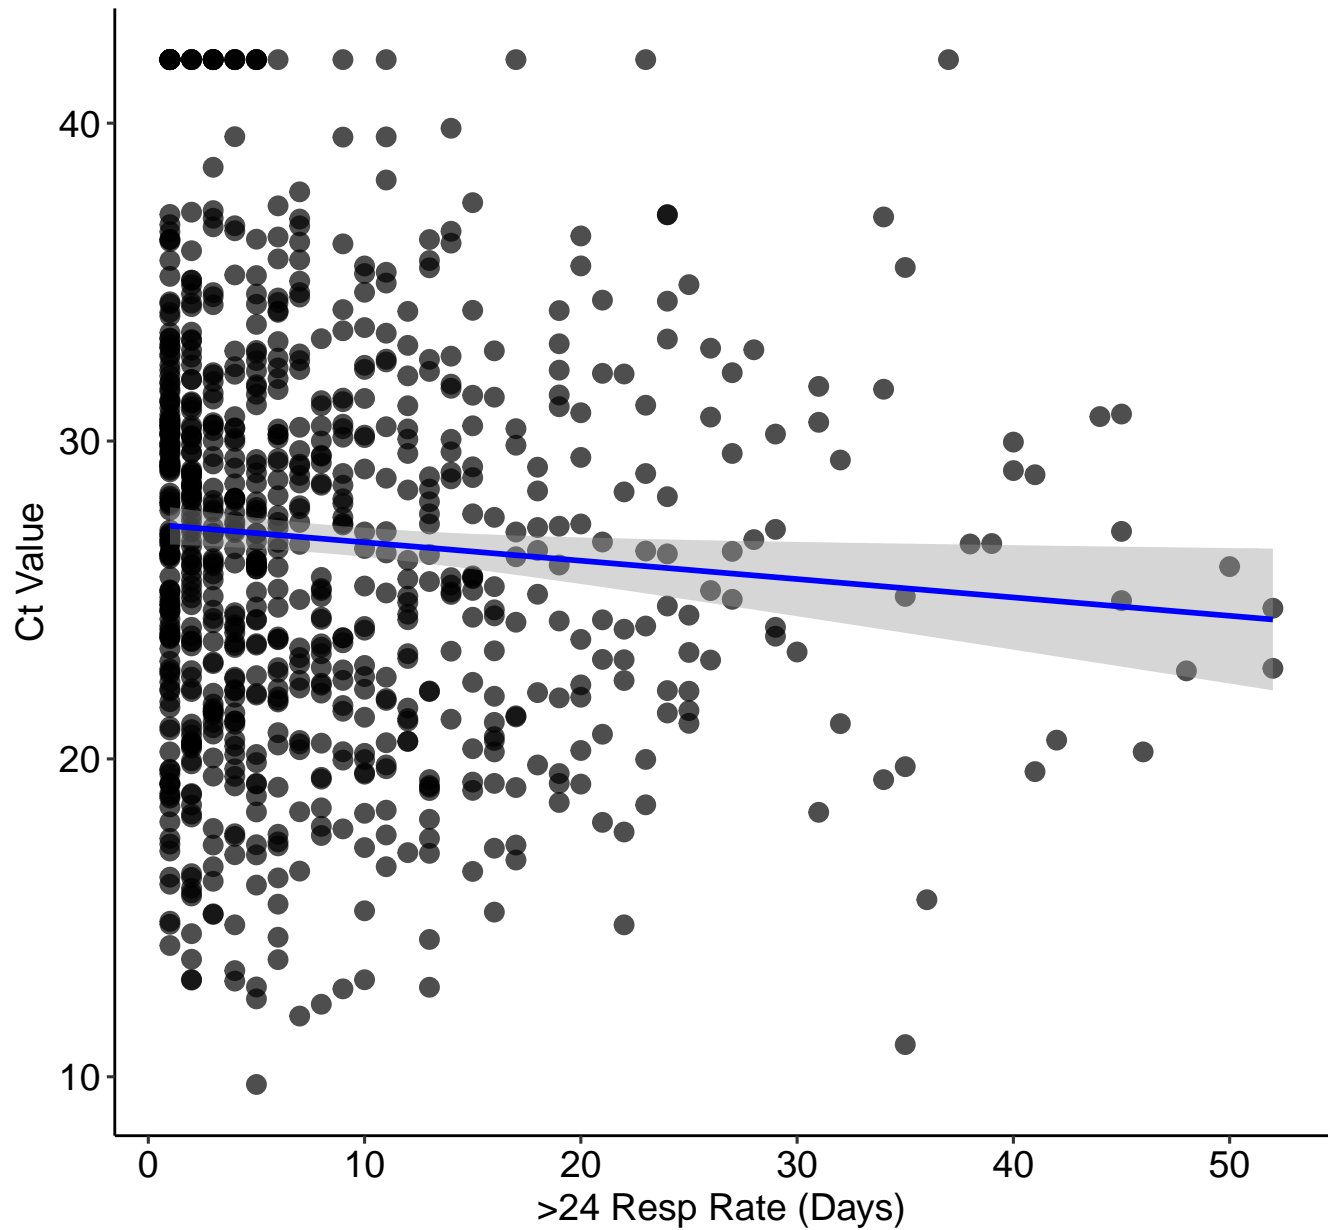

Total Number of Days of Hypoxemia (during the study)

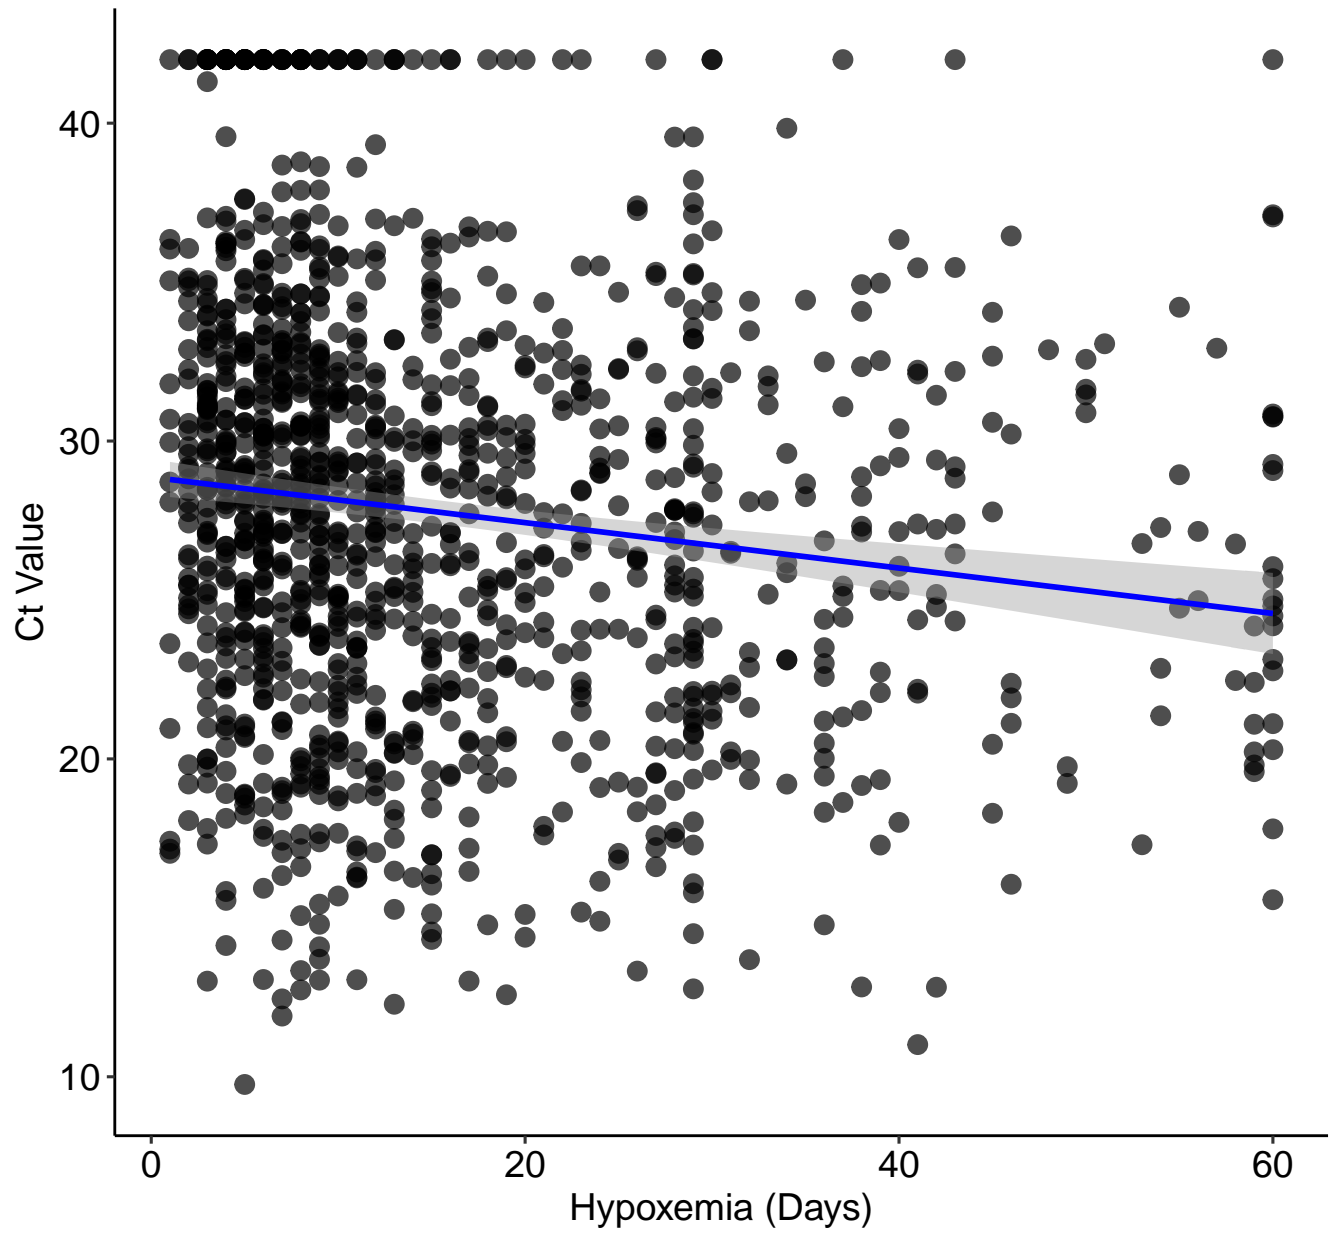

Total Number of Days on SUPP Oxygen Use (during the study)

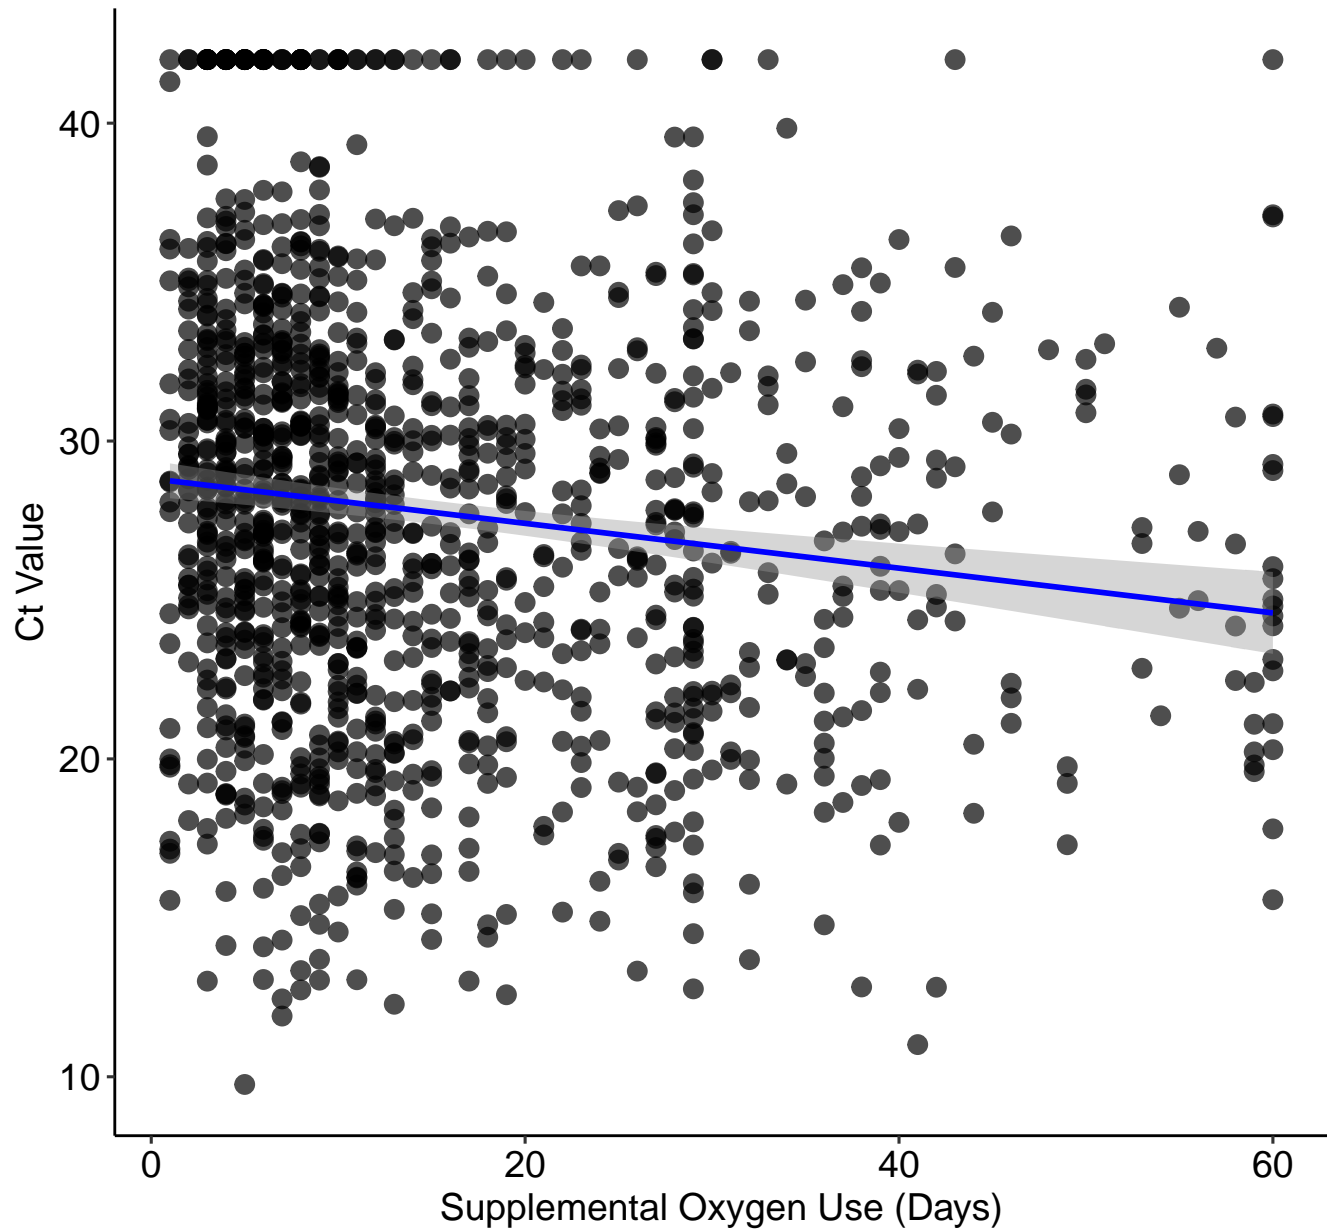

# Past Hypercapnic Respiratory Failure

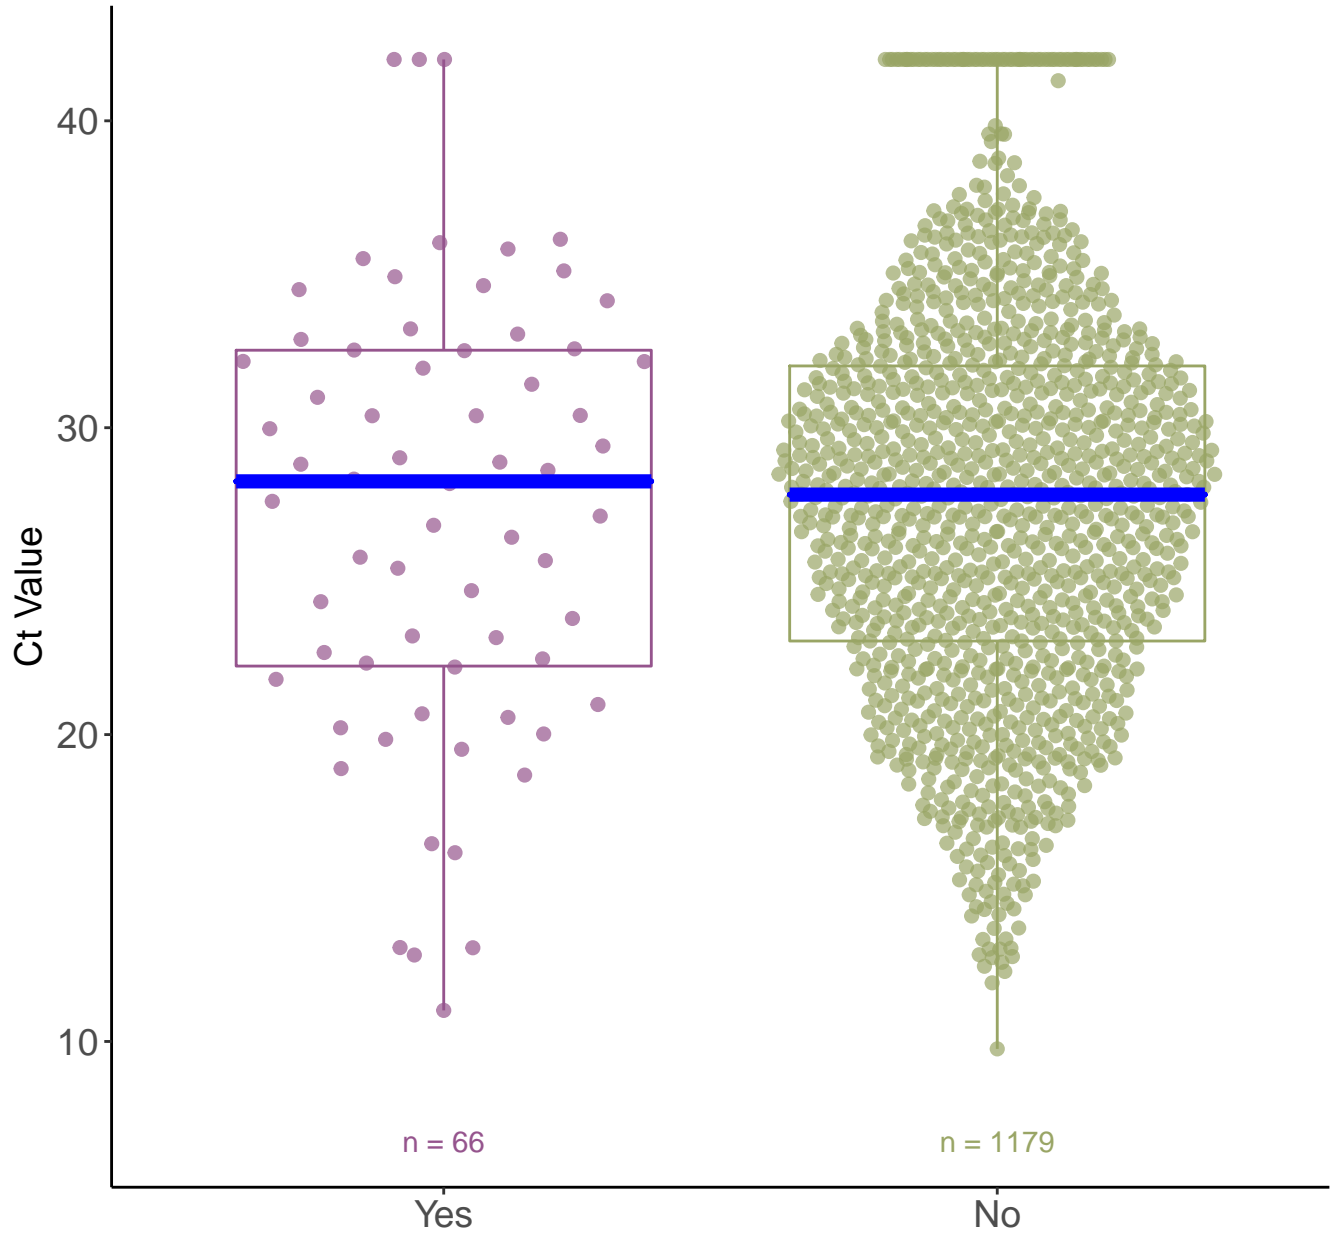

# Evidence Presented Based on X-ray or CT

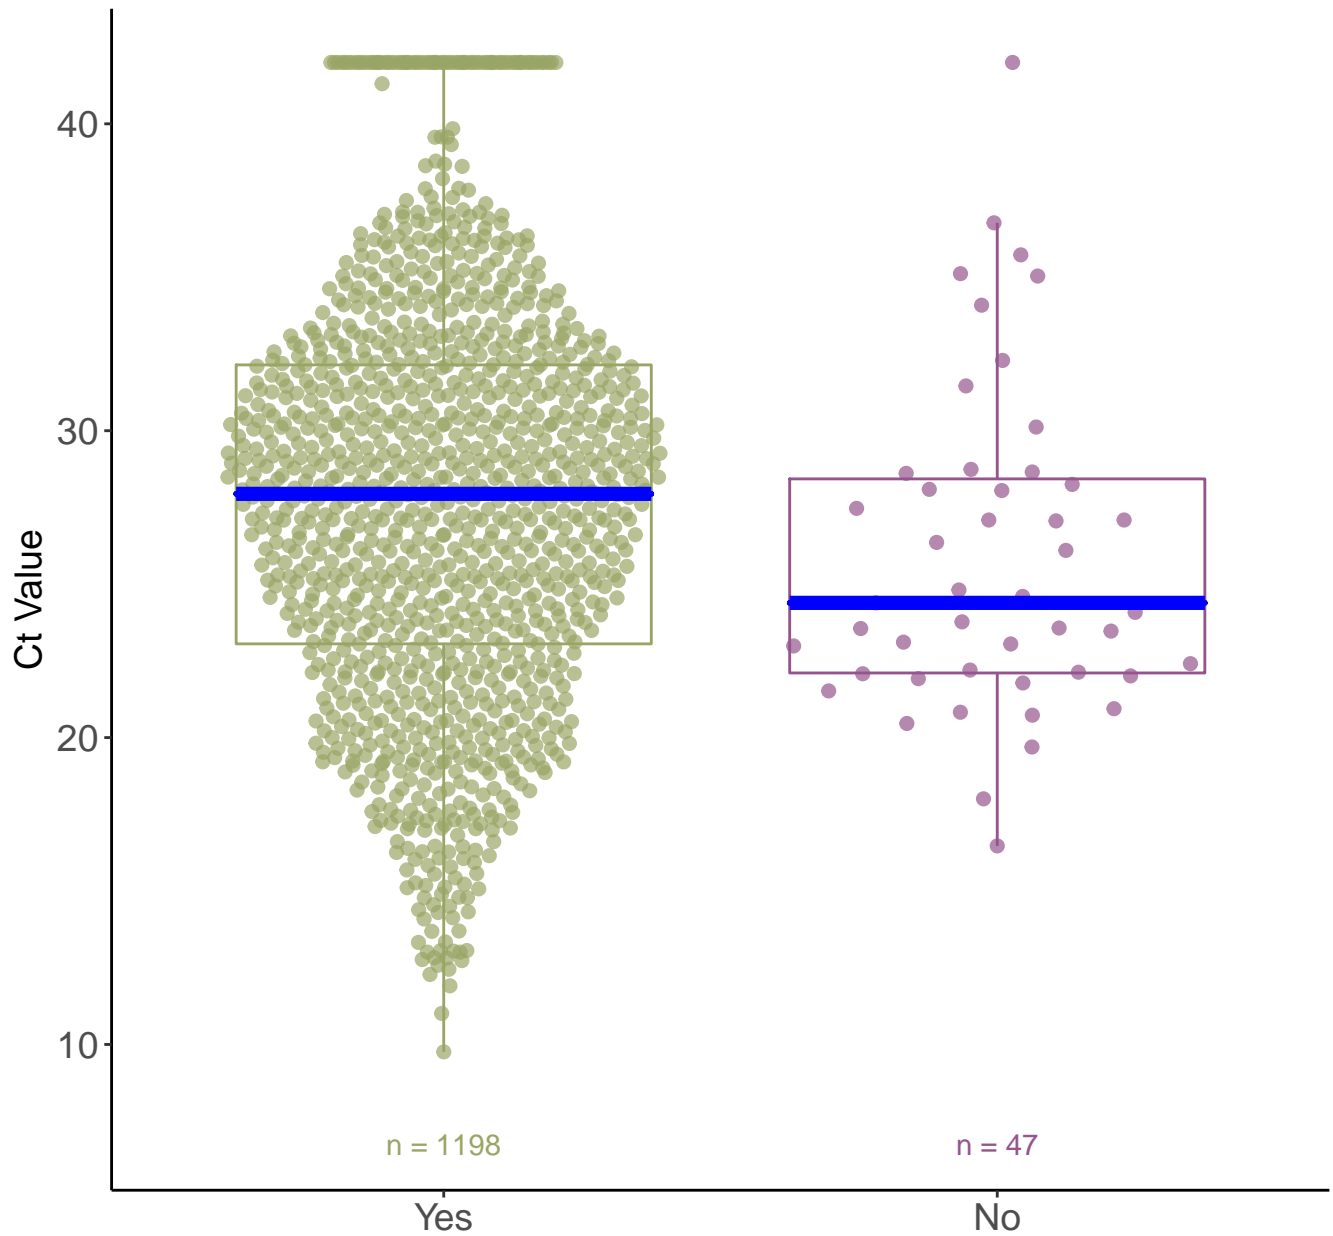



# Rales/crackles on Lung Auscultation

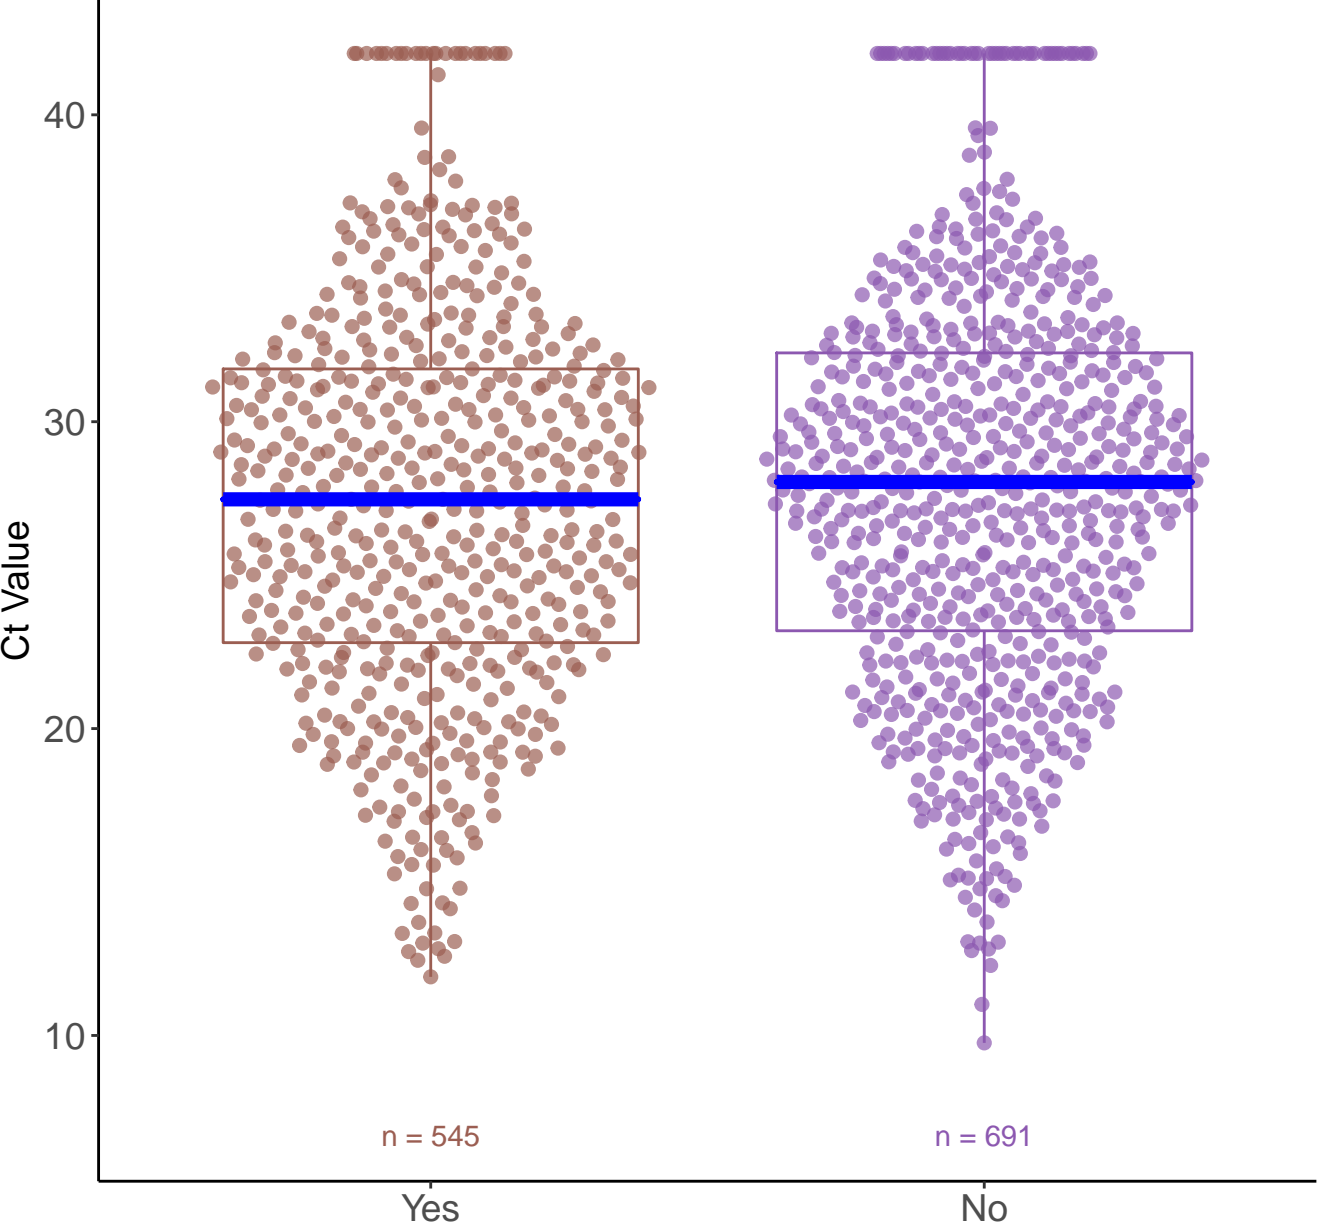

# Was Fever Documented in Medical Record

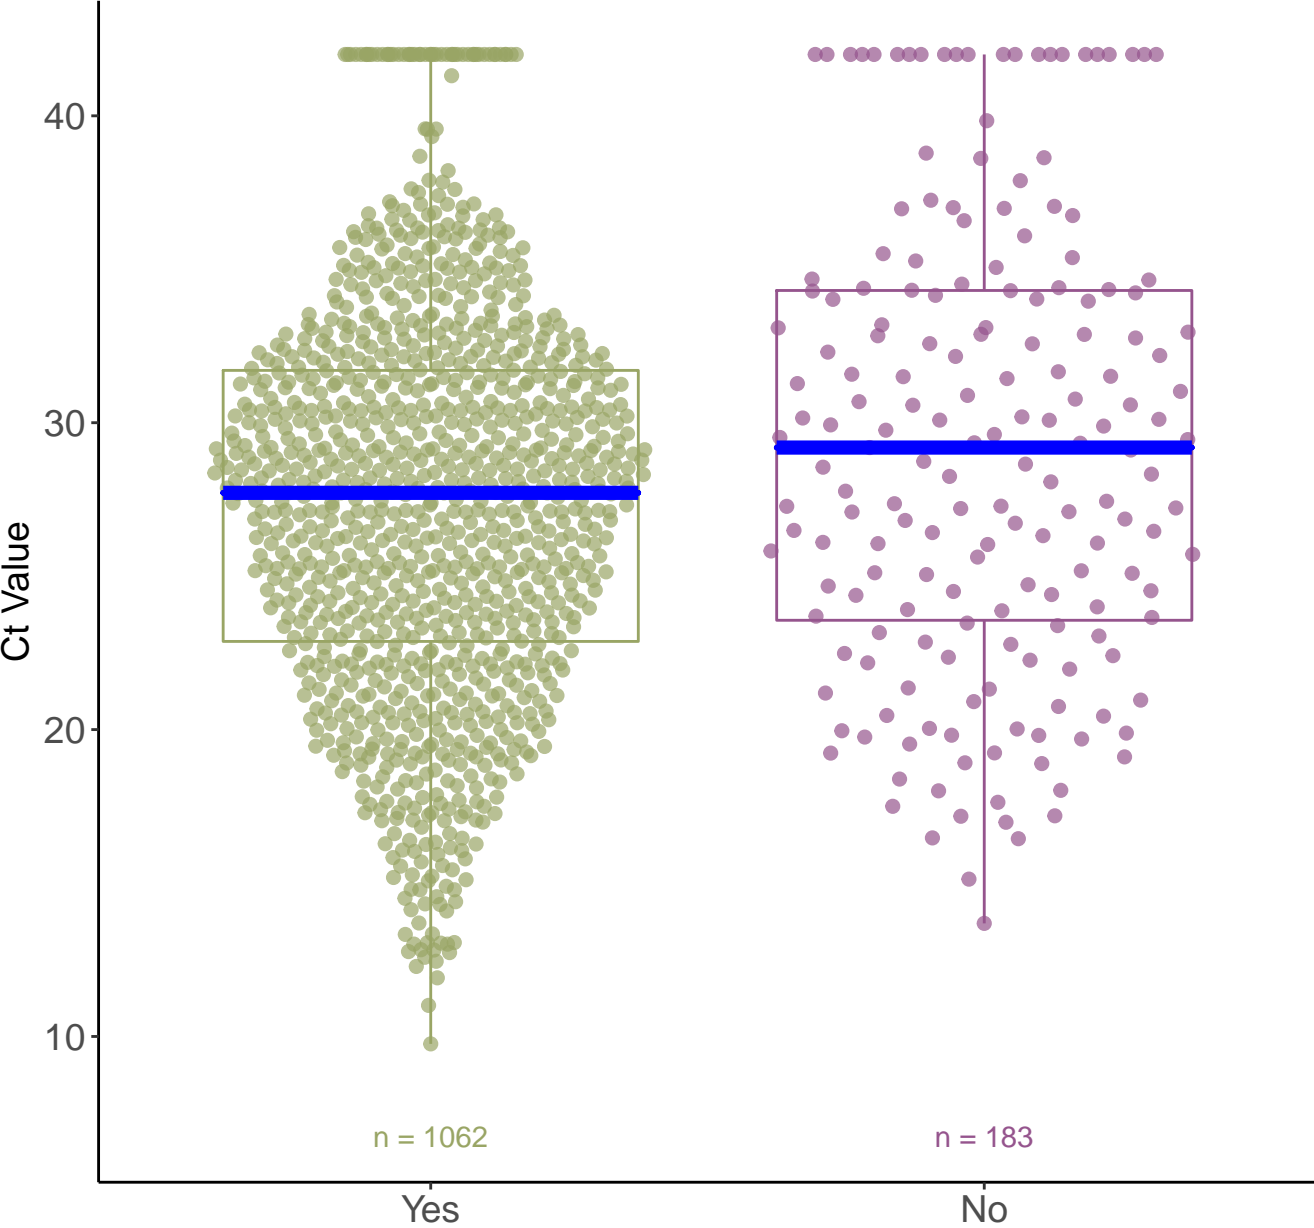

# Requires Treatment in ICU

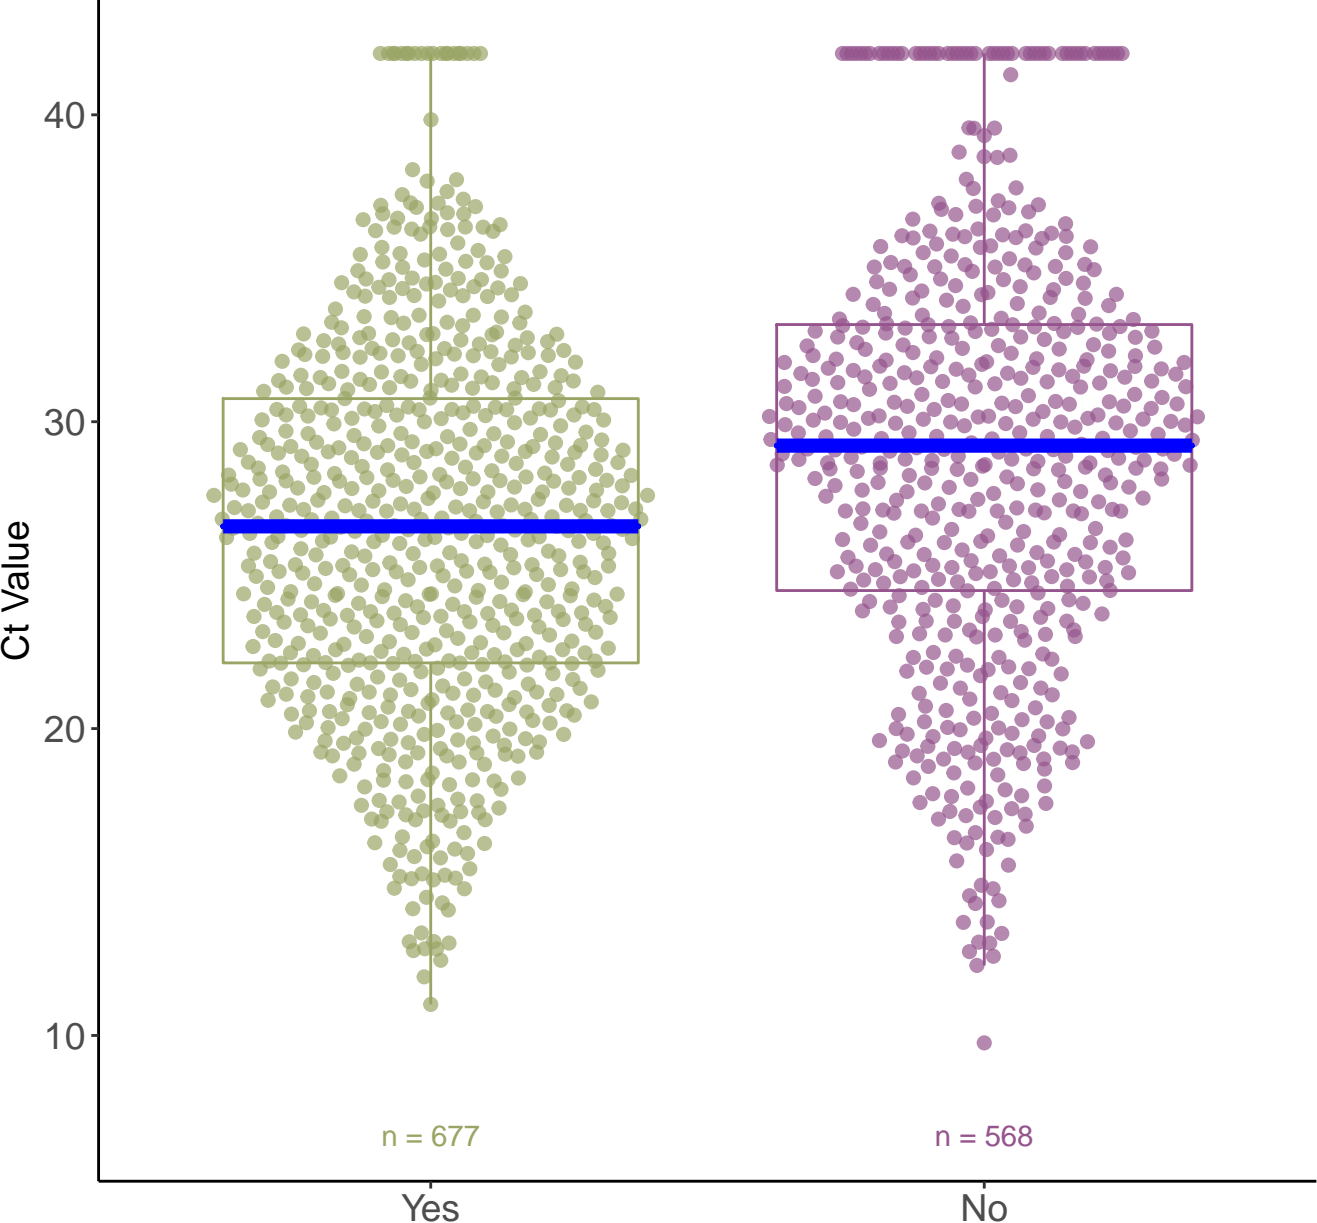

# Use of Vasopressors

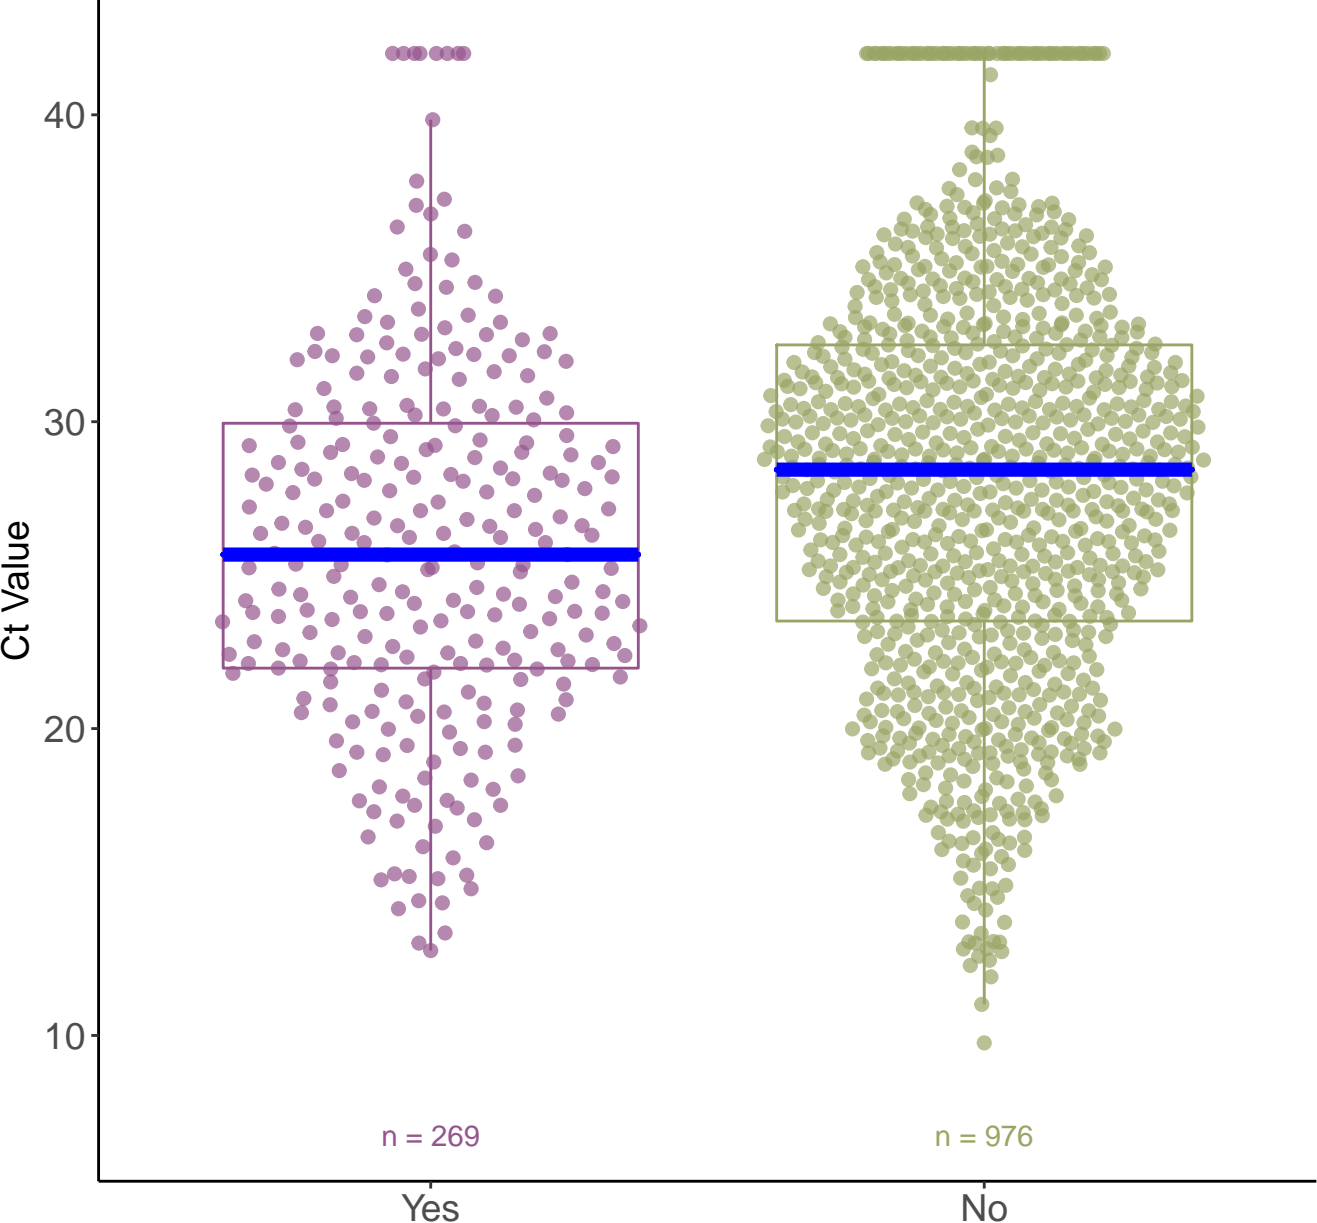

# Renal Replacement Therapy

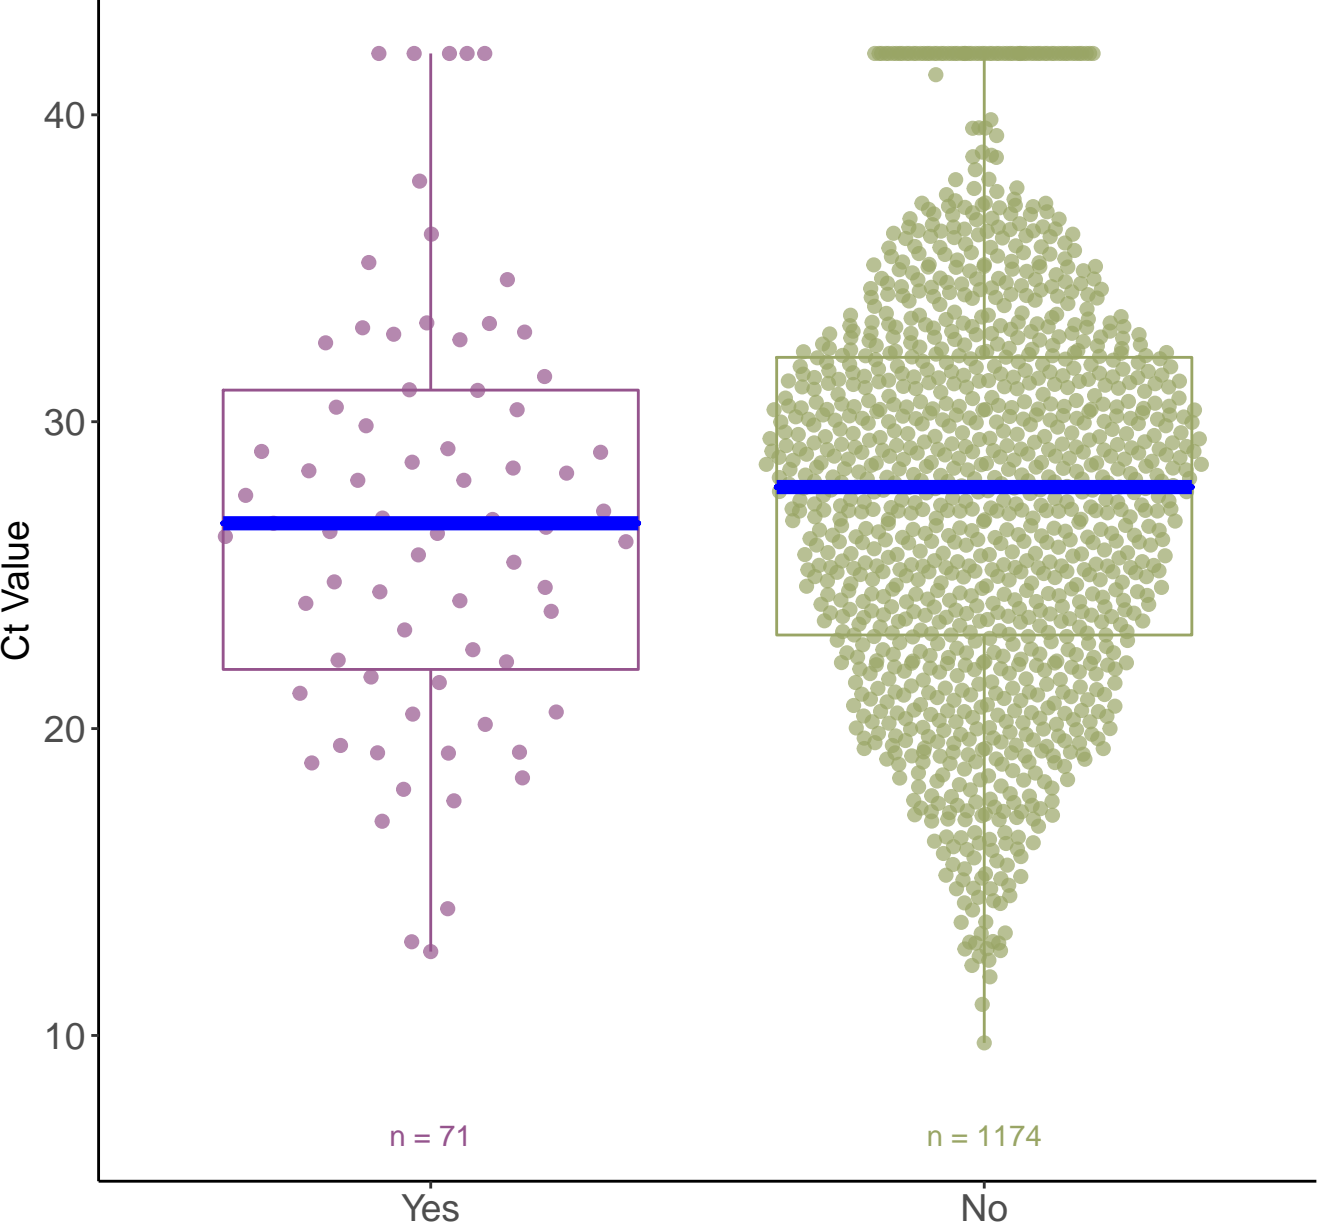

# Subject Immunocompromised

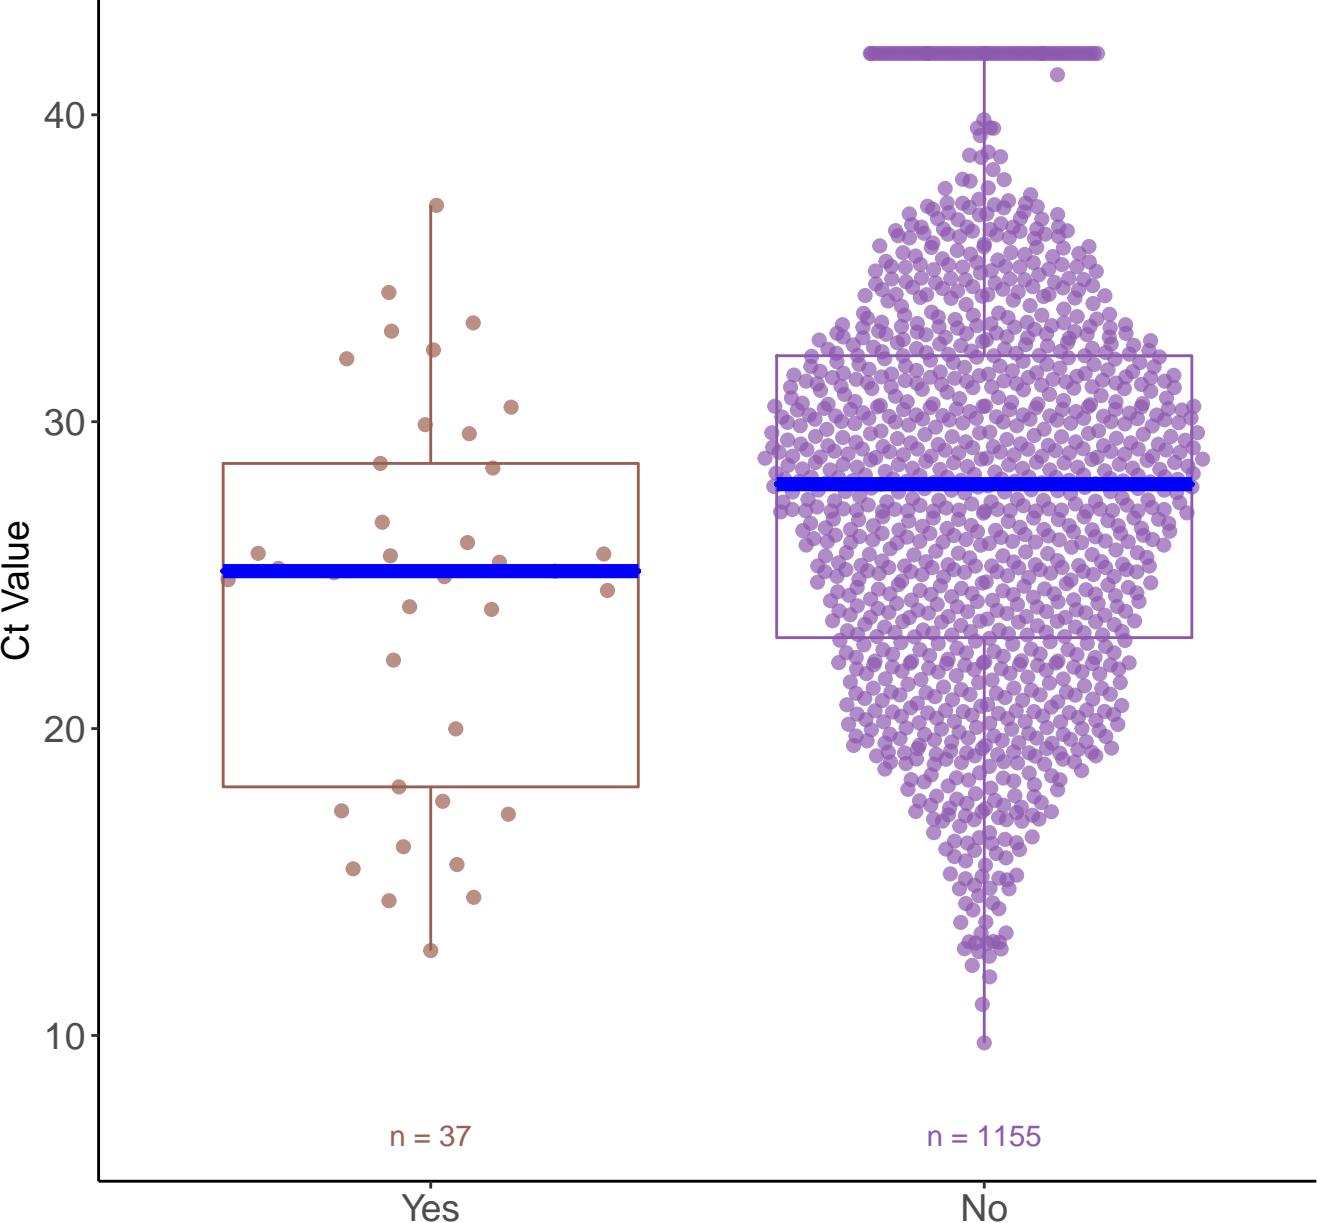

# Currently Taking Immunosuppressants

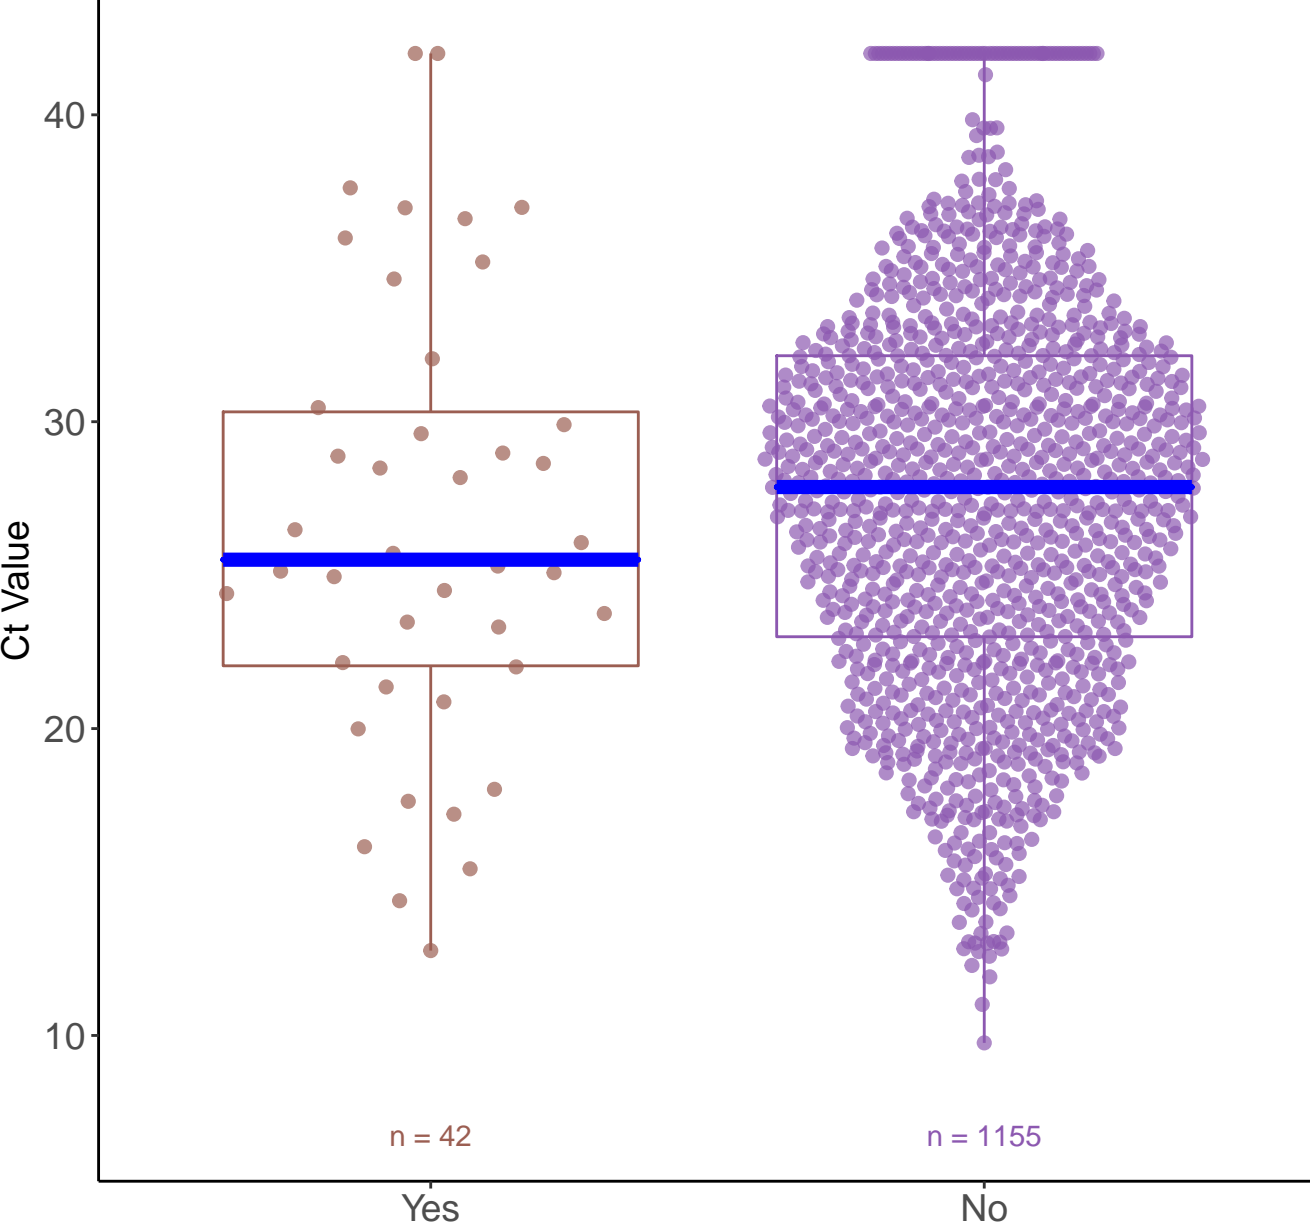

# Baseline Oxygen Device Type

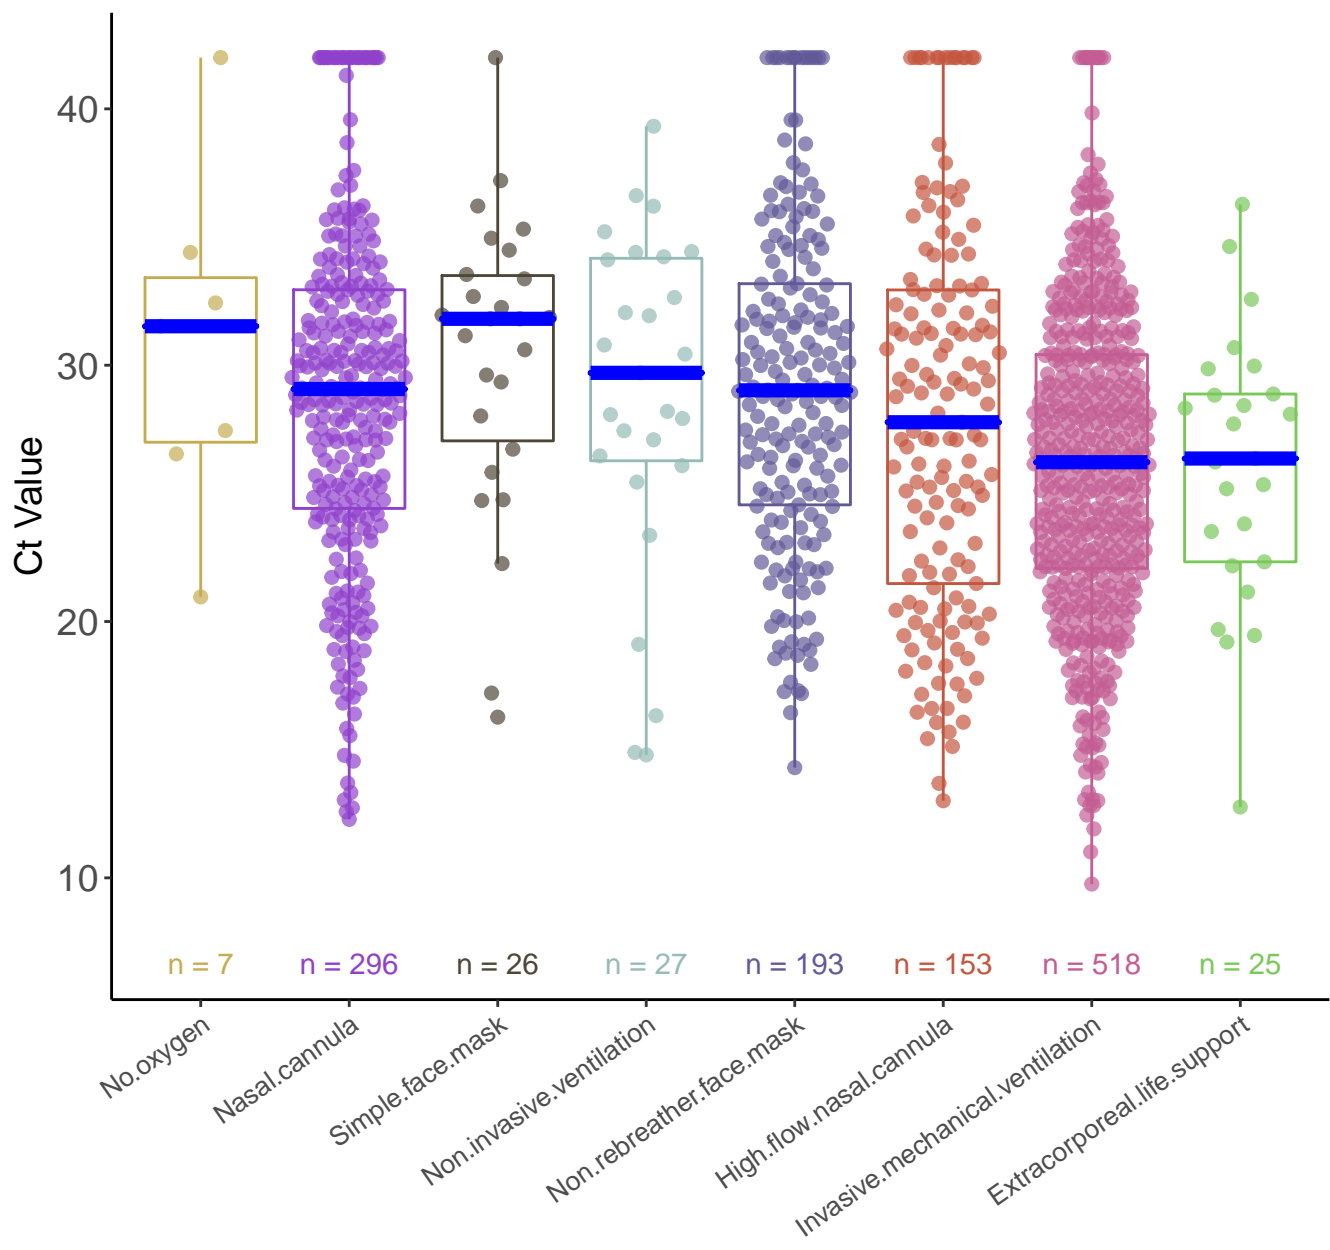



# Baseline Oxygen Device Type (Grouped)

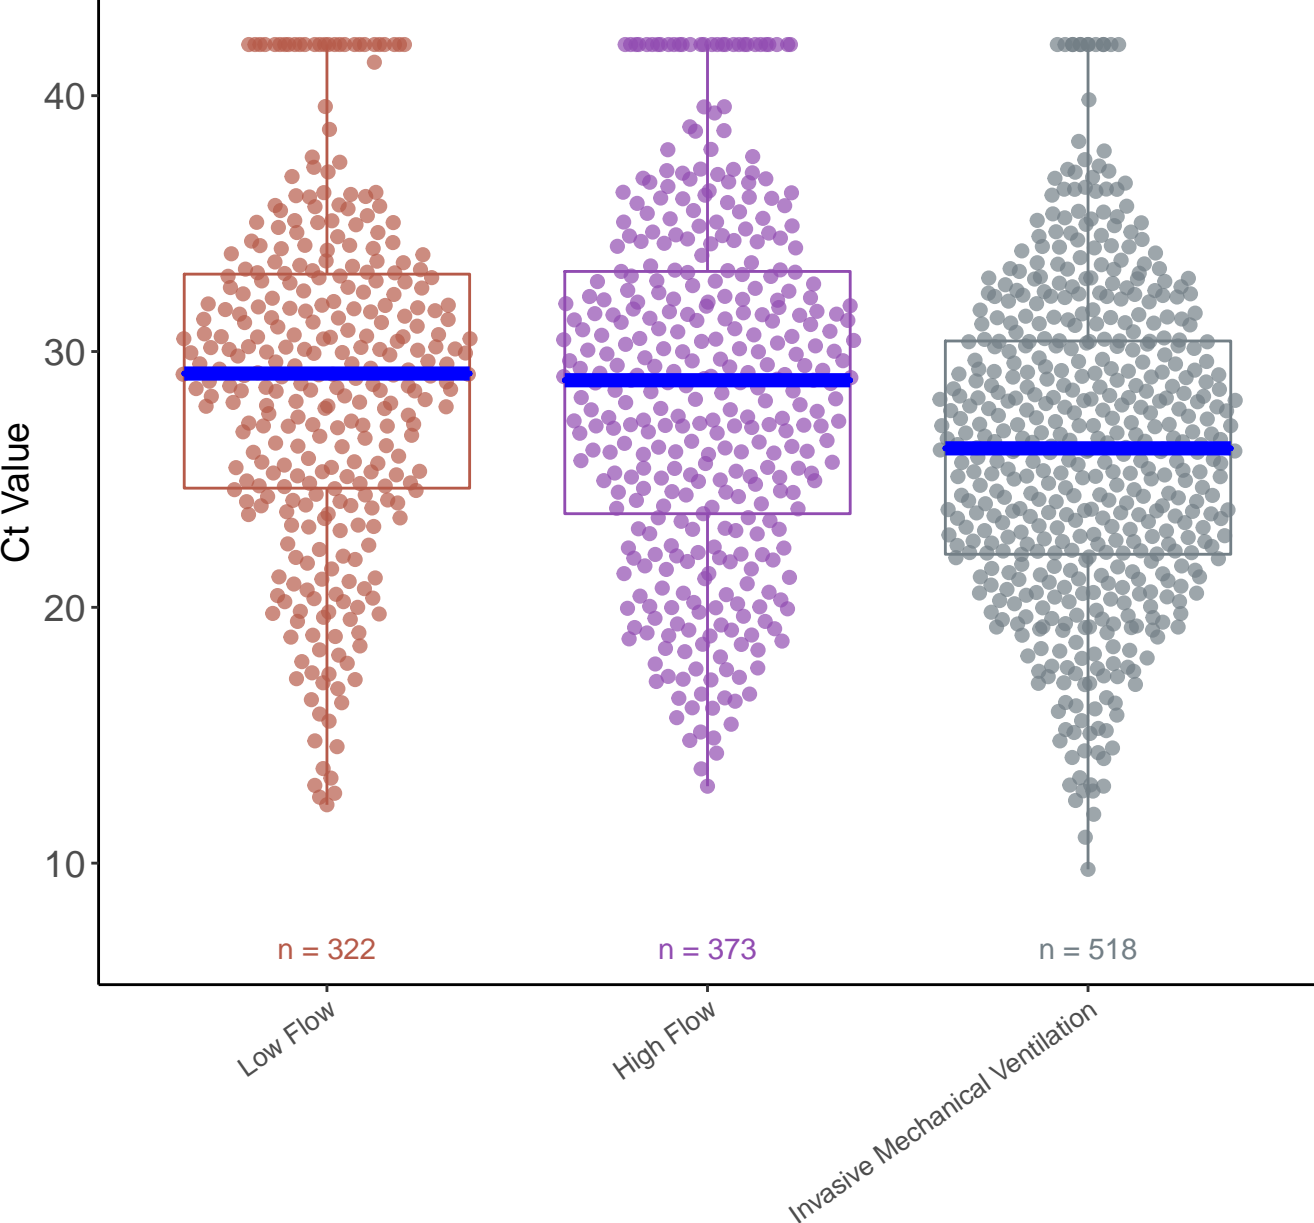

Baseline Oxygen Flow Rate (L/min)

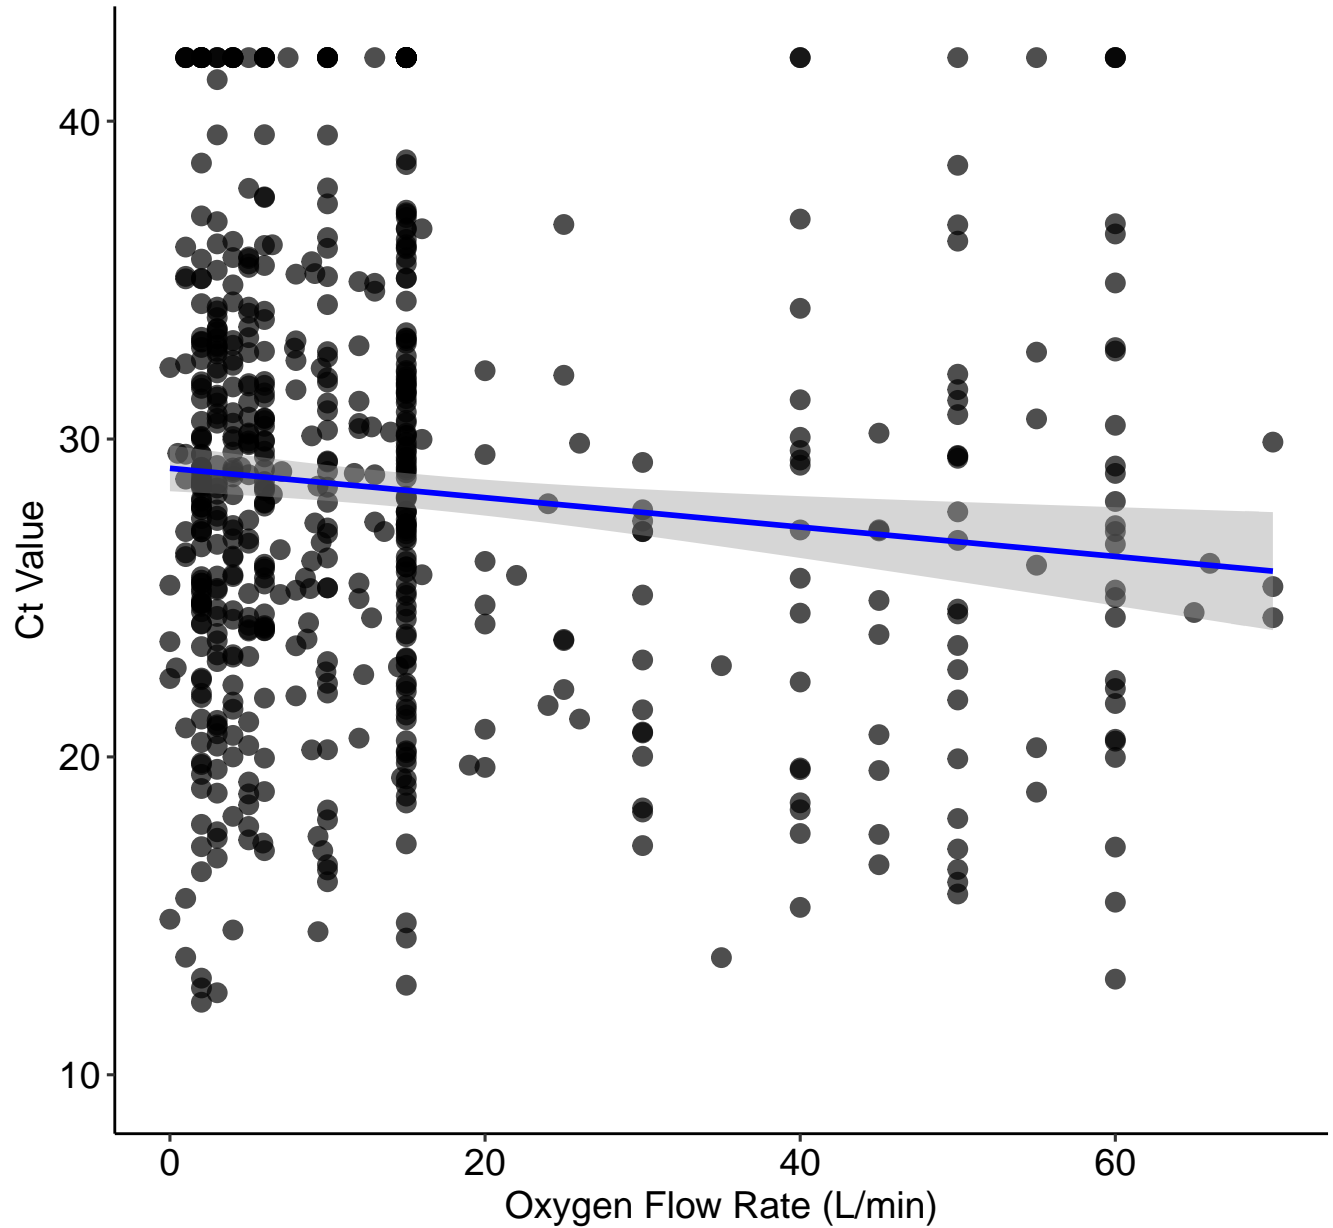

Baseline FiO2 (Fraction)

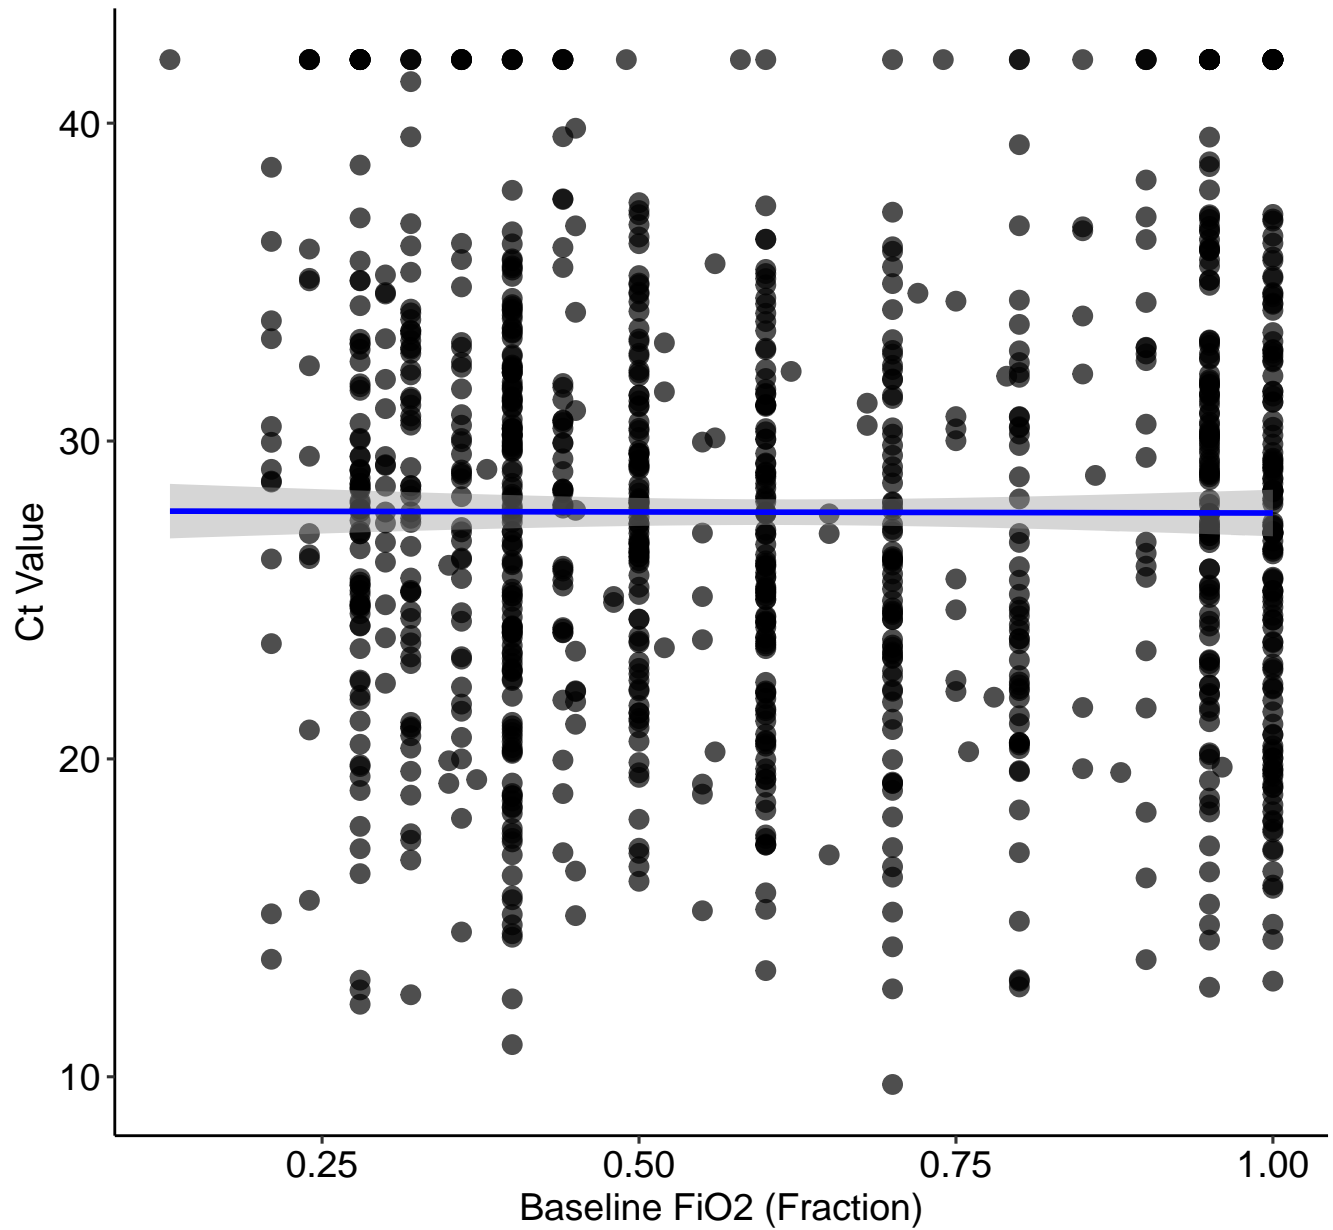

Baseline SPO2/FIO2 Ratio

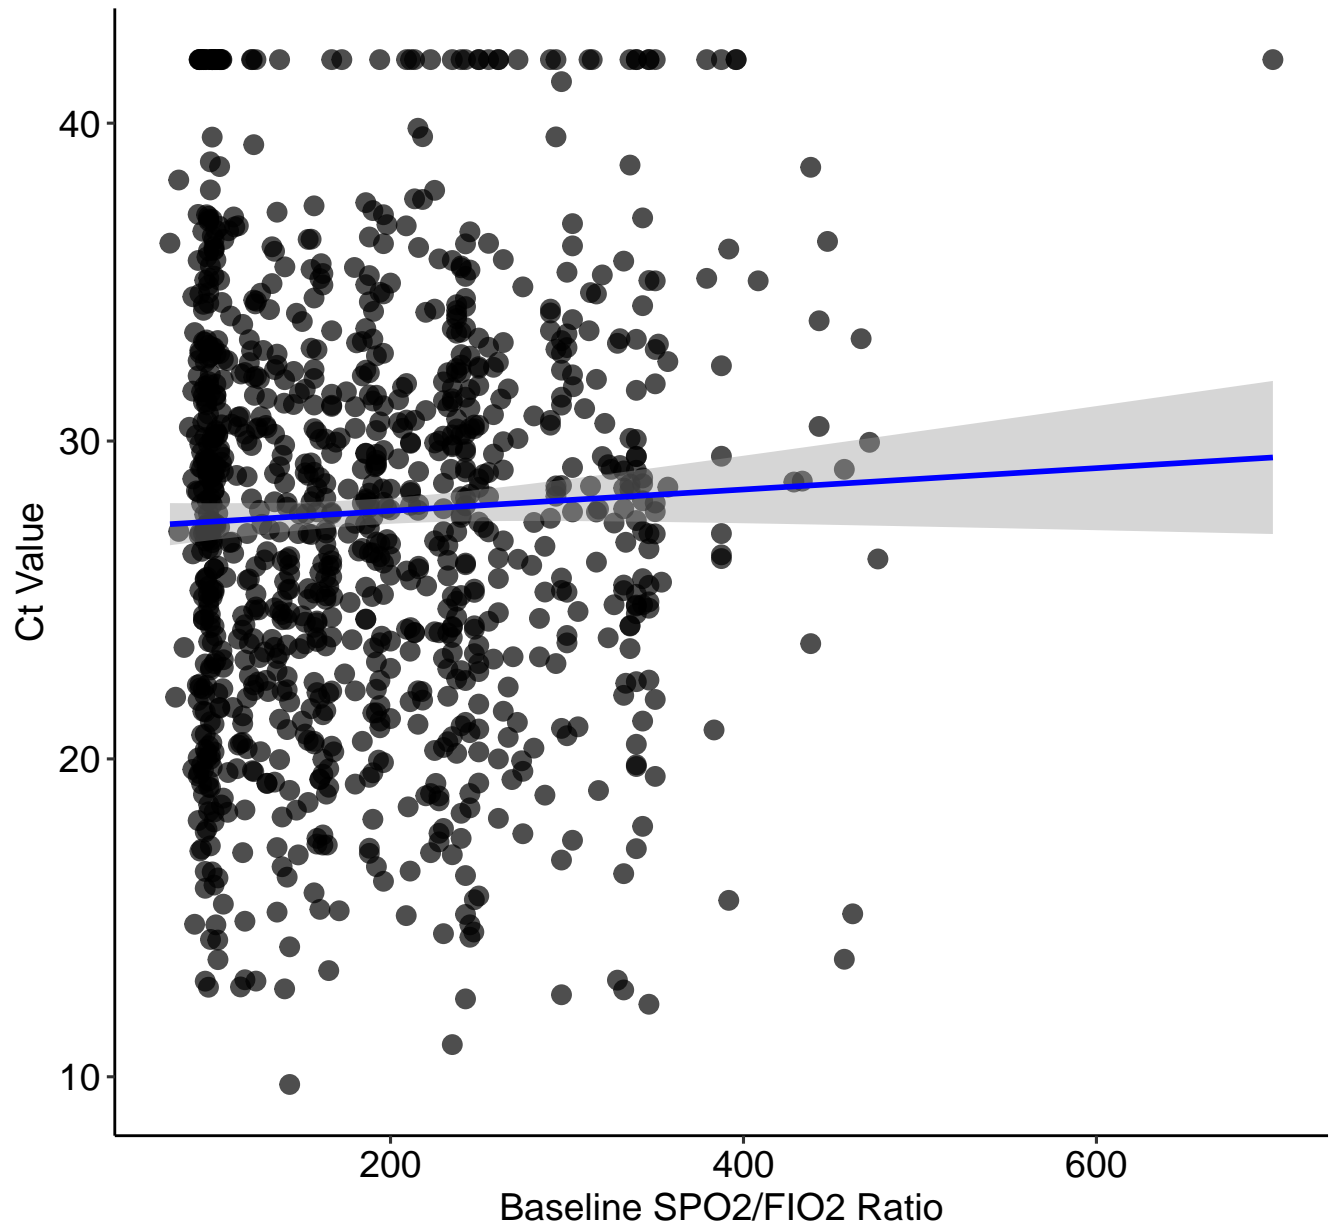

# Time to All Cause Mortality

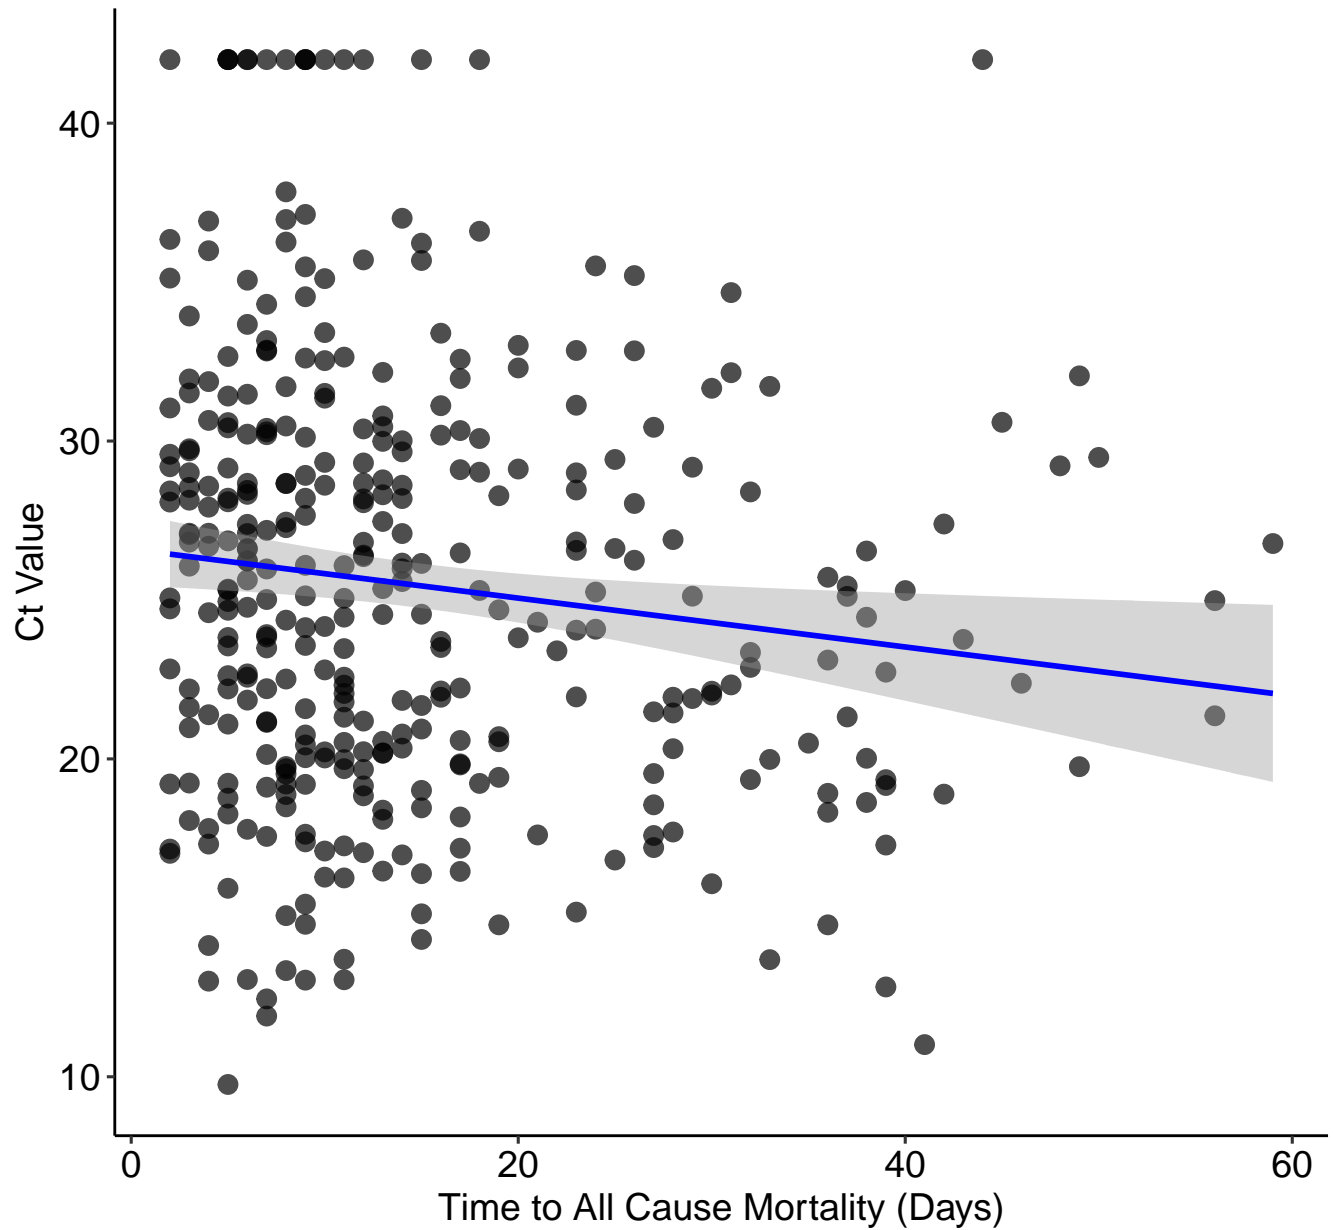

# All Cause Mortality

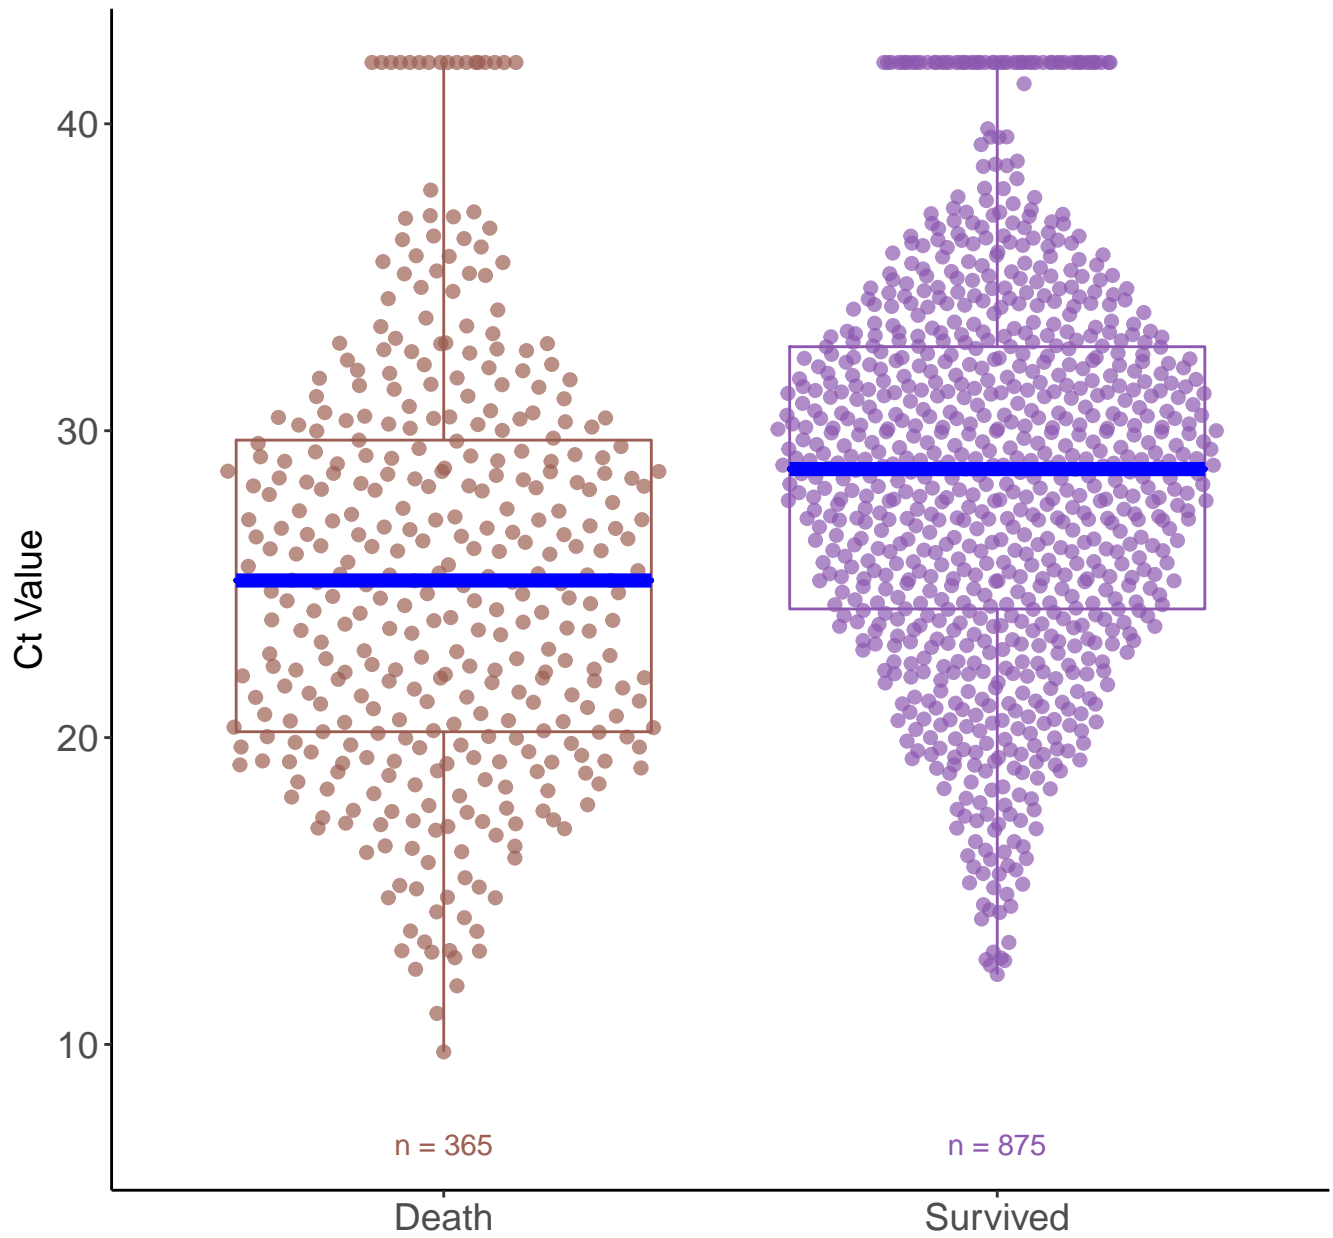

Time to Improvement ( $\geq 1$  point) in Clinical Status

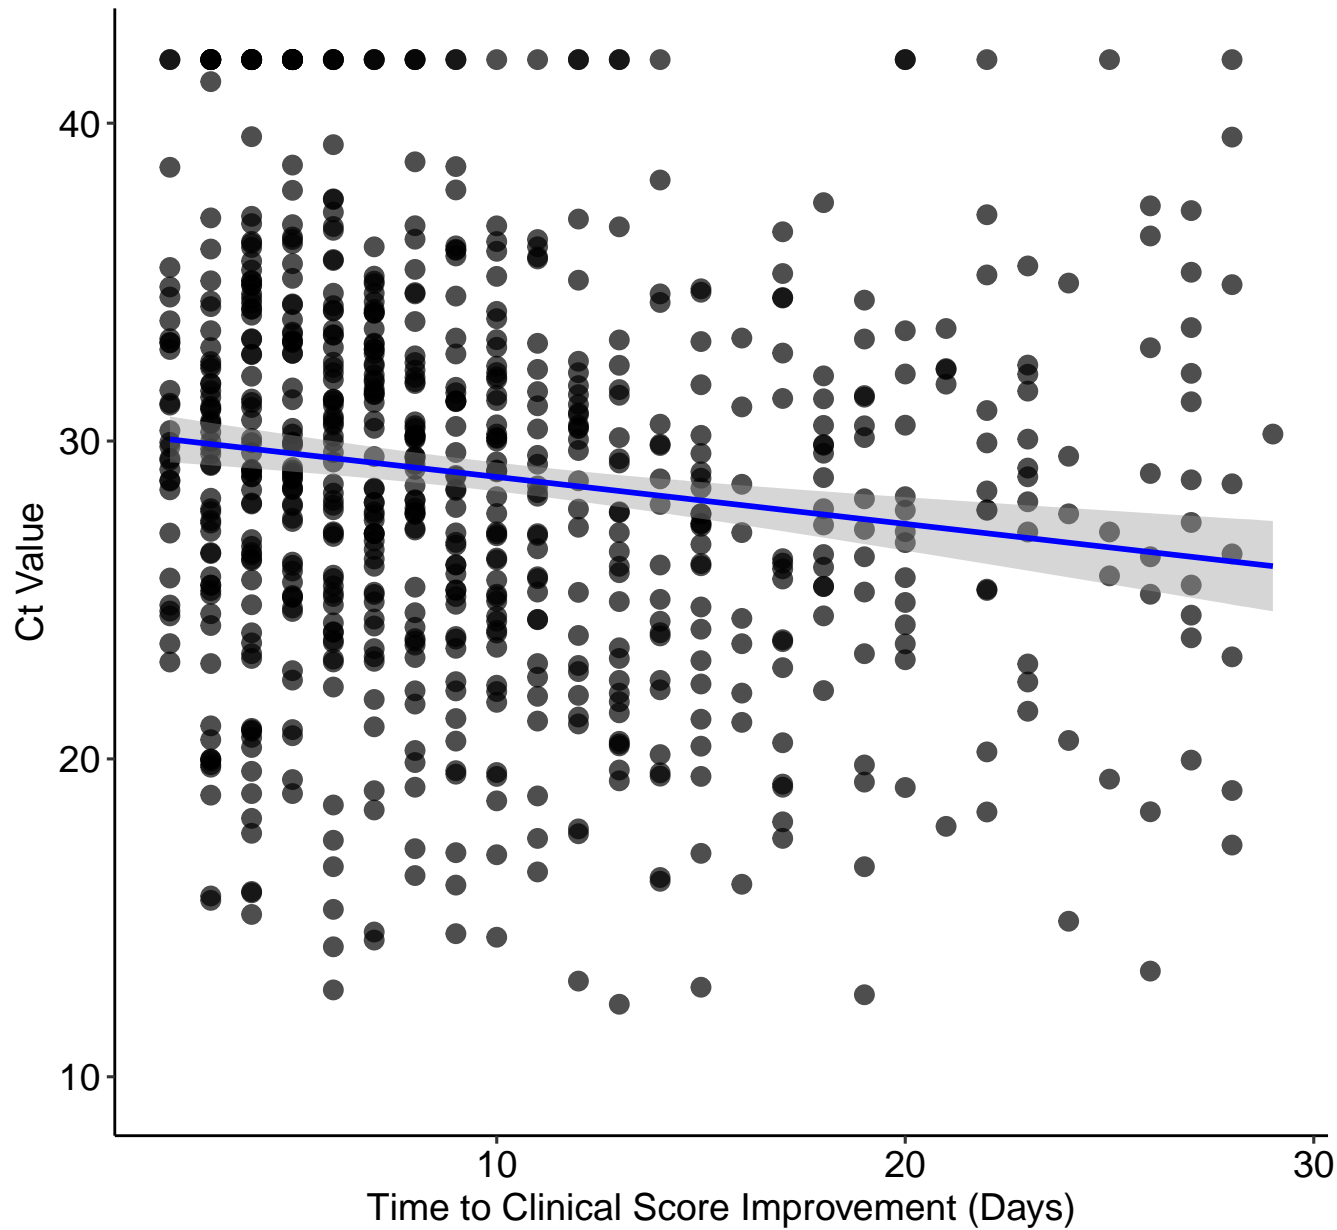

# Improvement ( $\geq 1$ point) in Clinical Status

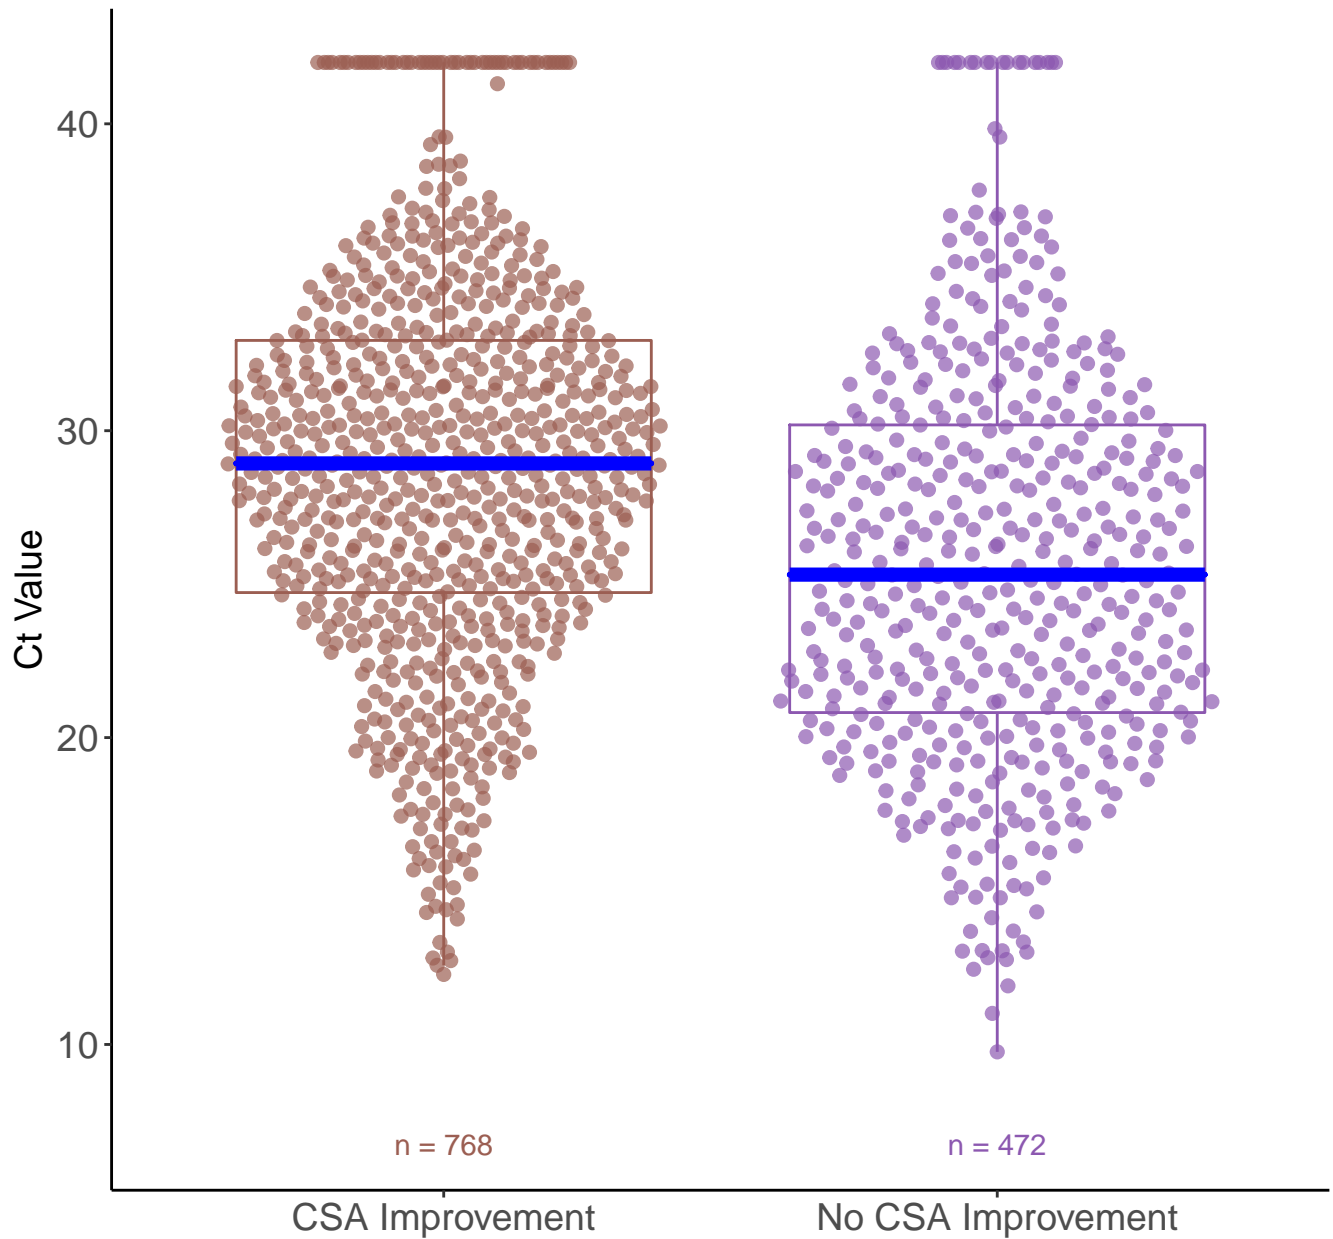



Time to Improvement in Oxygenation

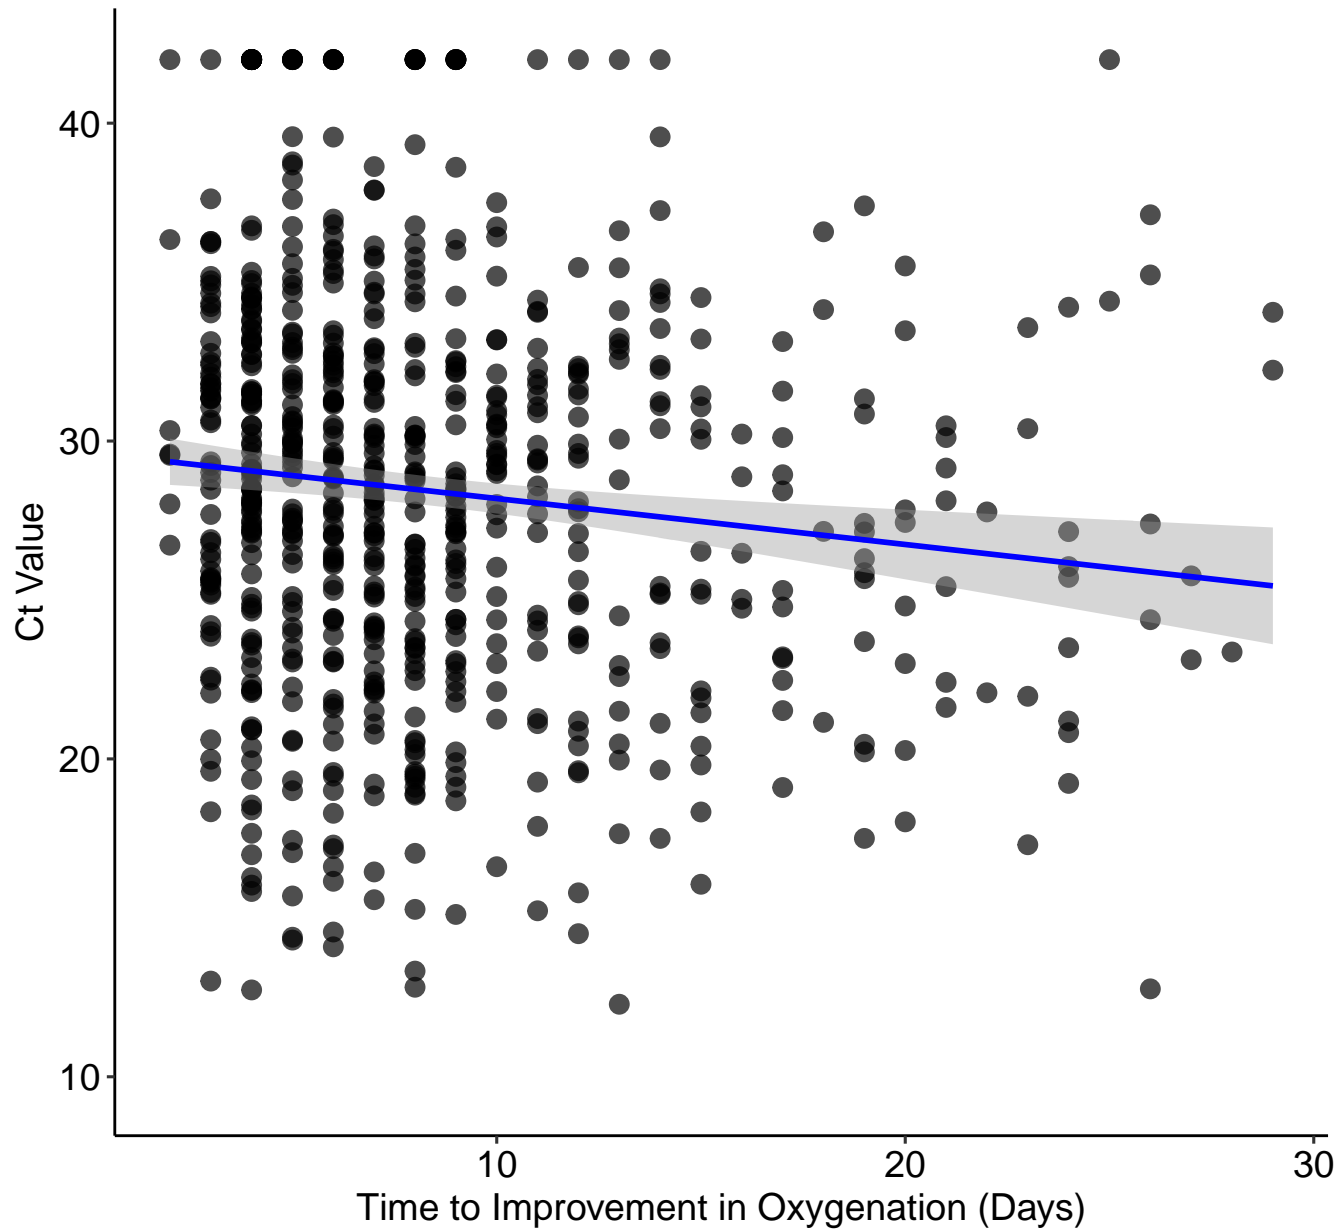

# Improvement in Oxygenation

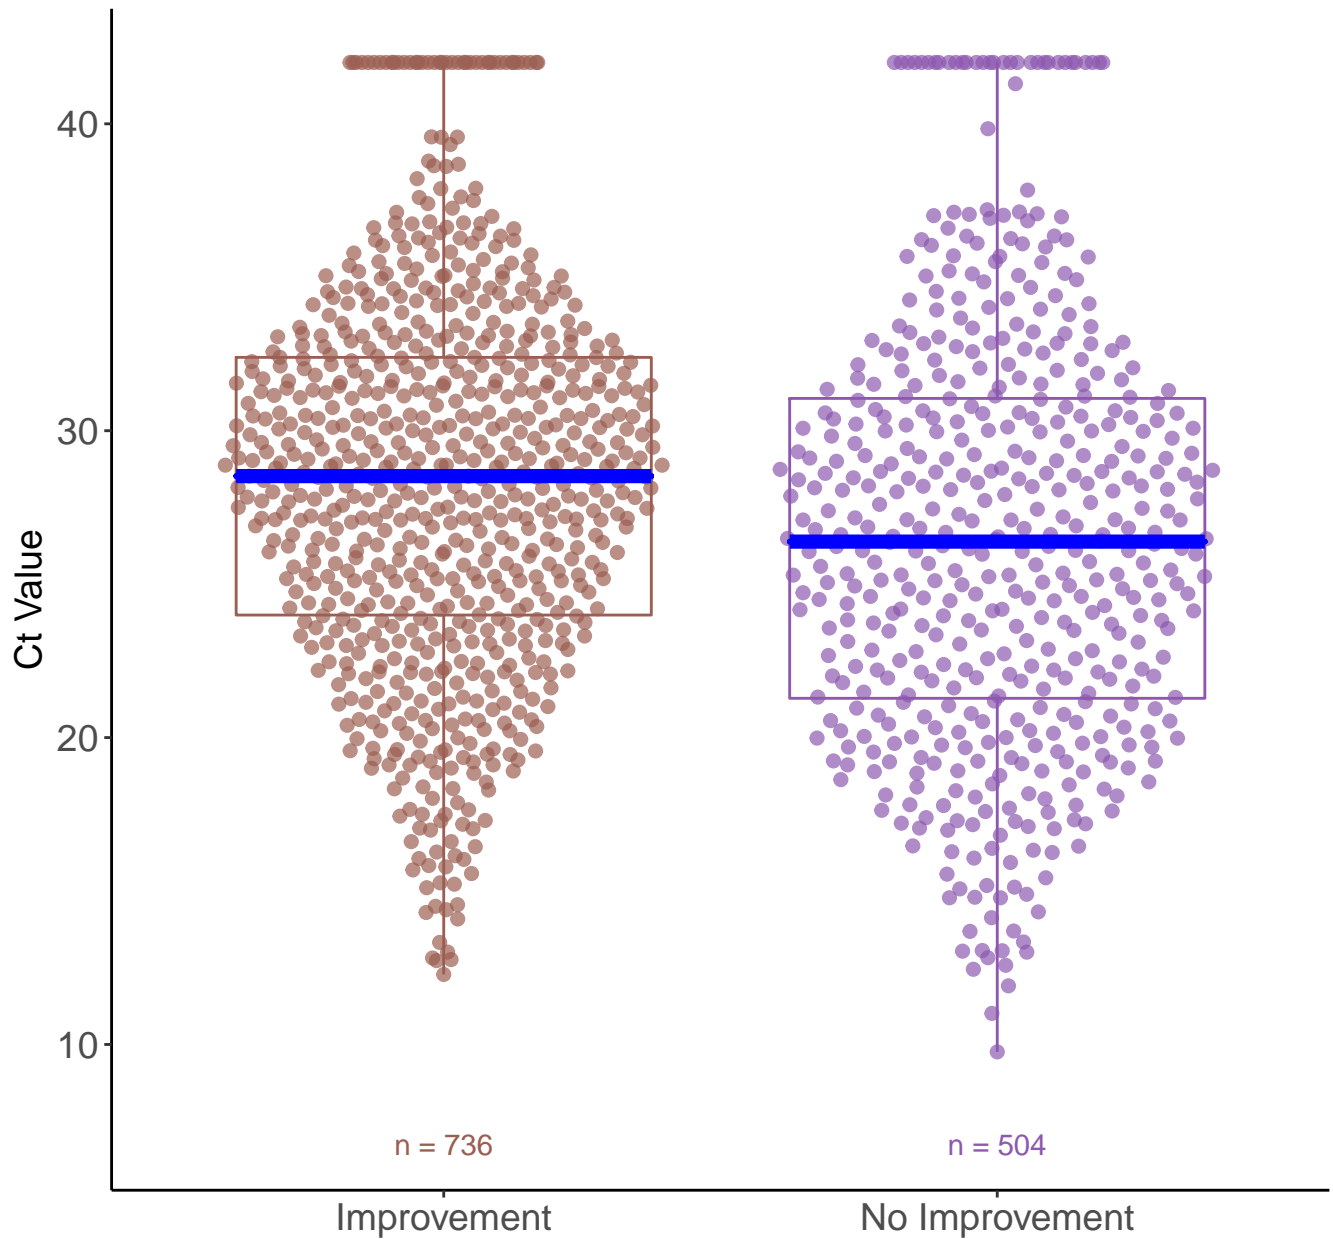

Time to Oxygen Saturation  $\geq 94\%$

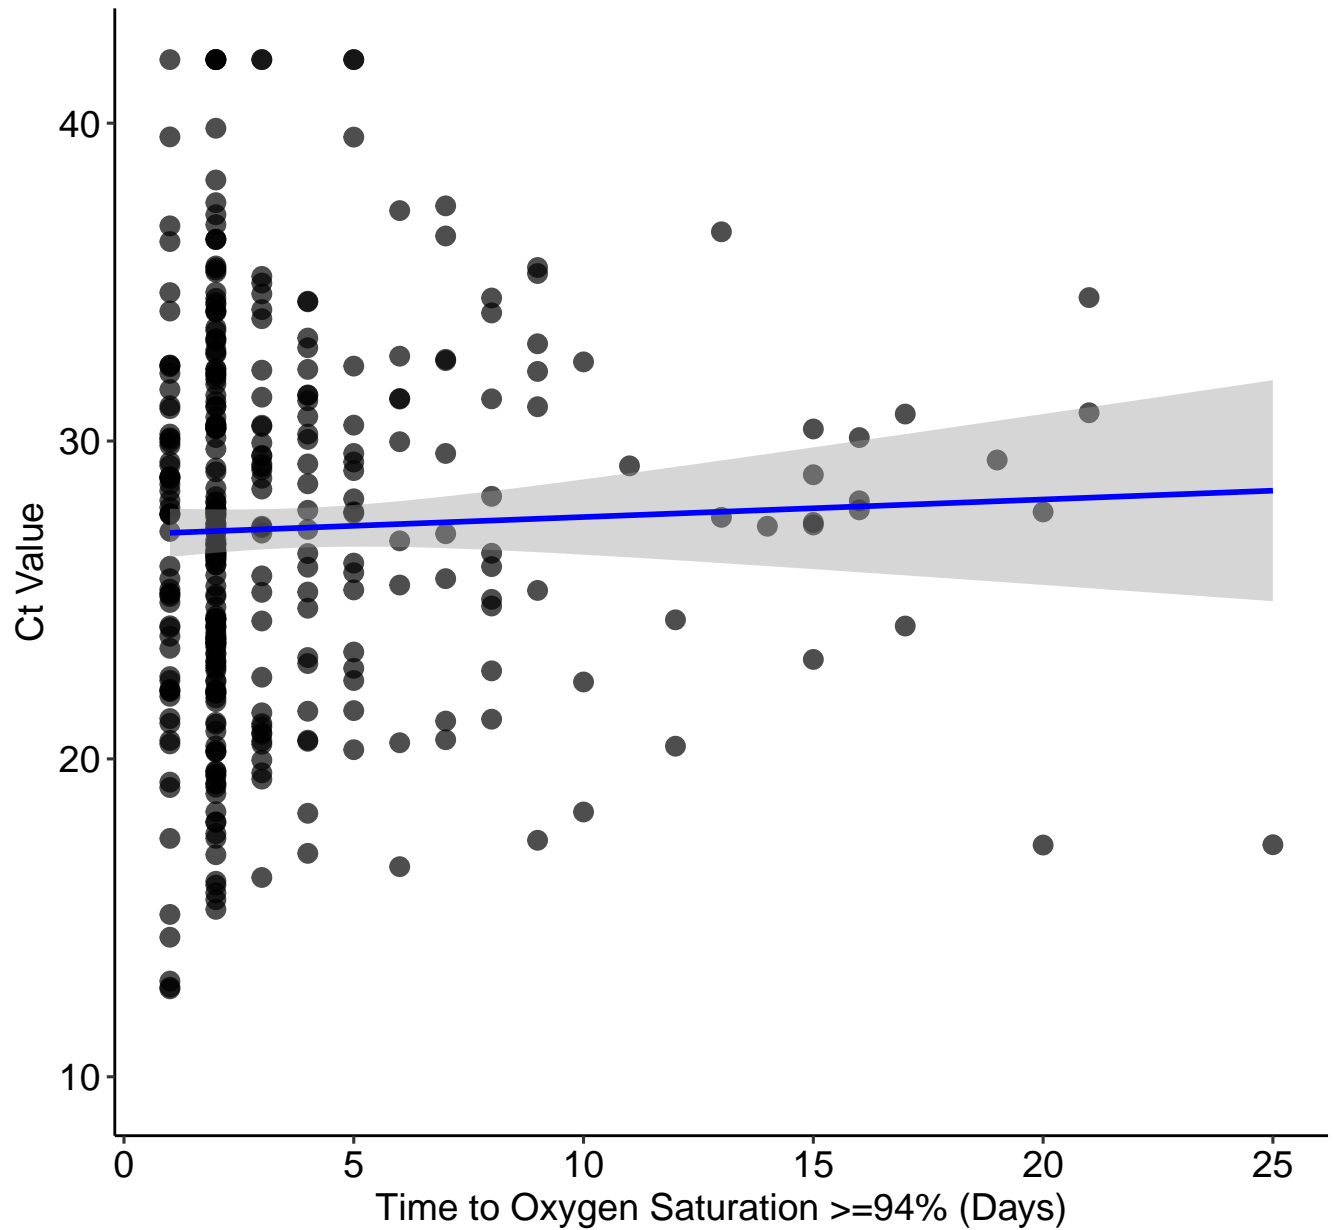

# Oxygen Saturation $\geq 94\%$

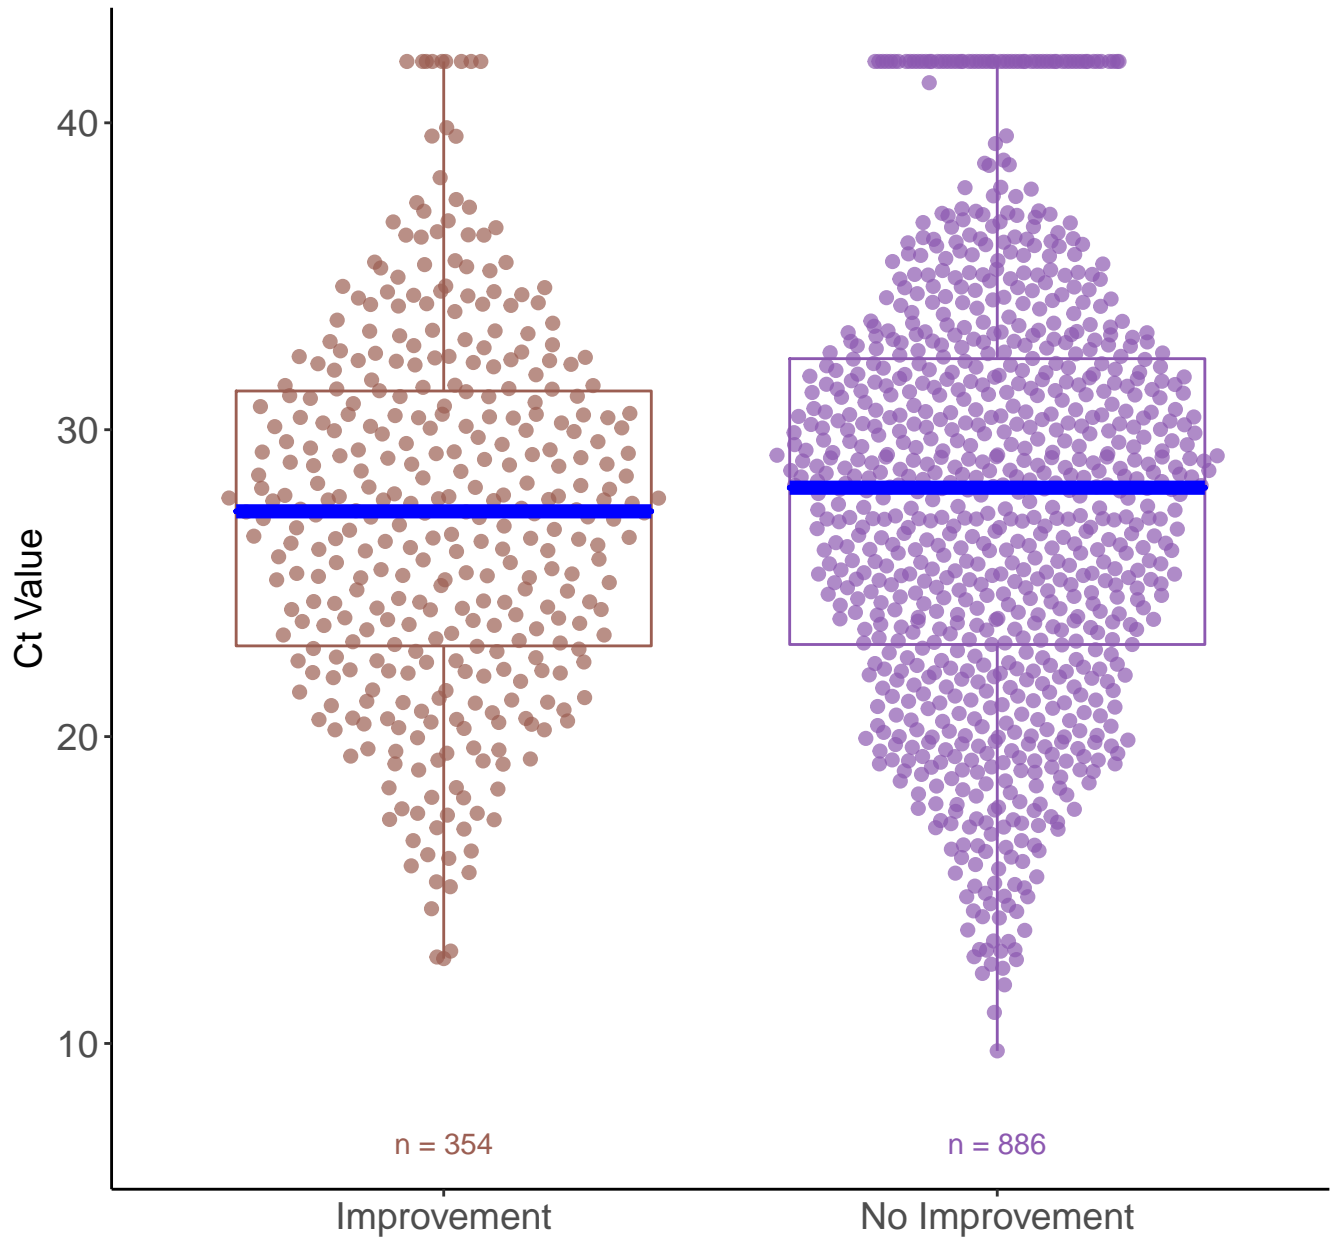

Time to Hospital Discharge

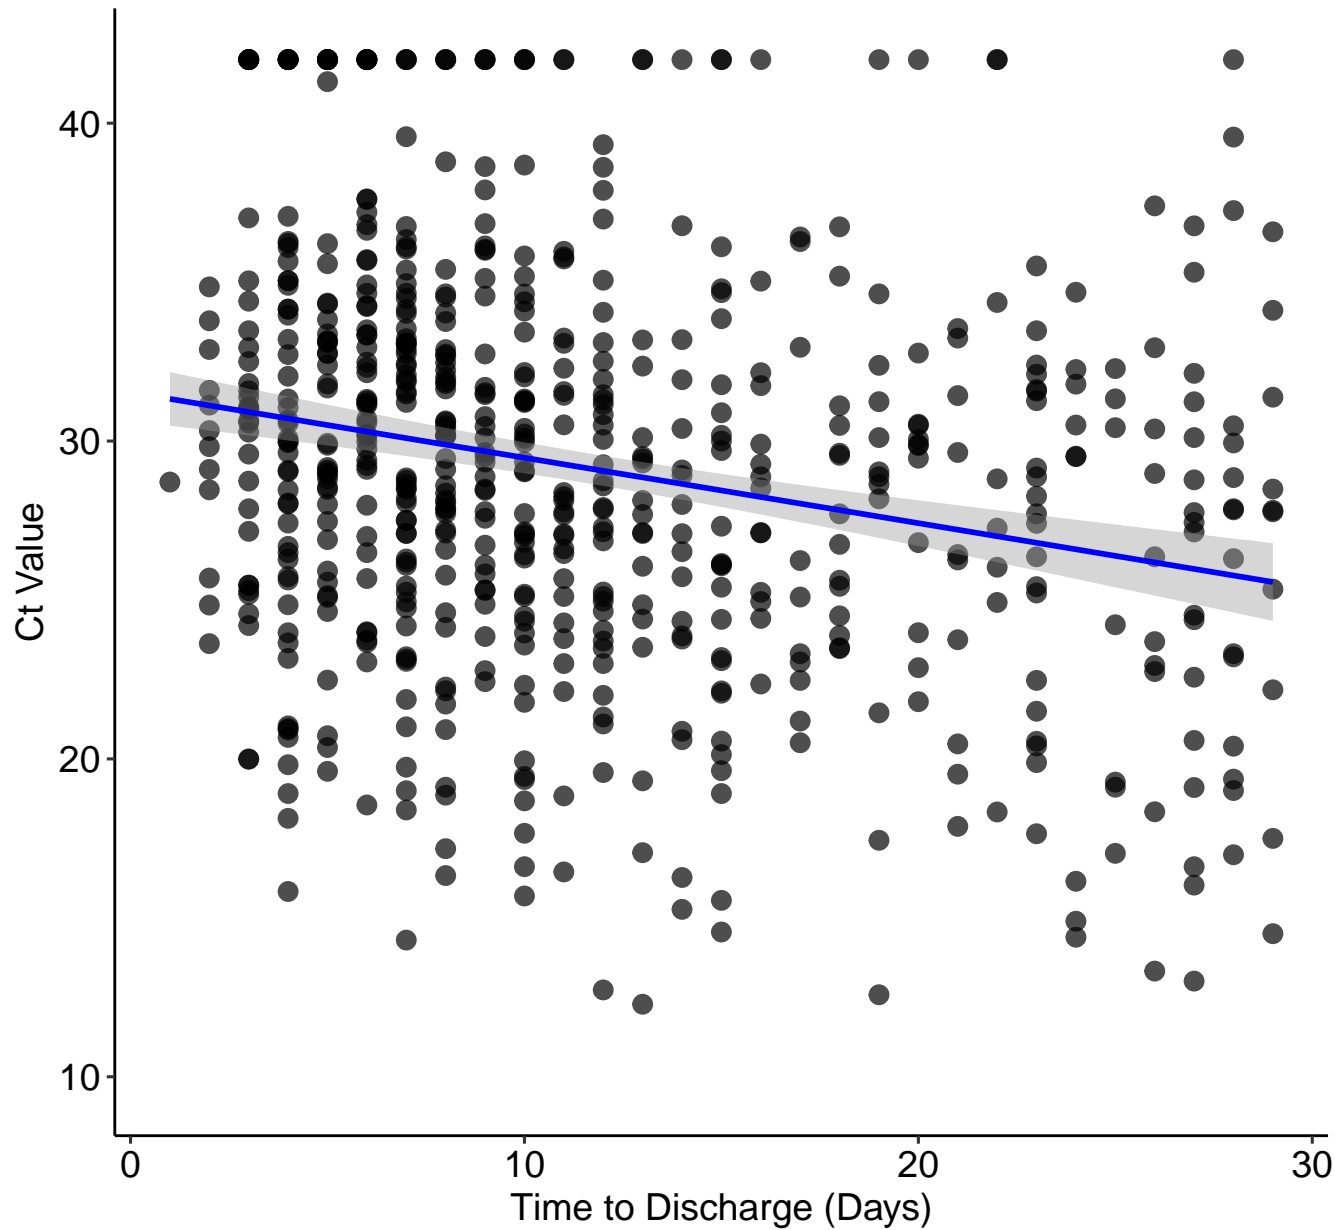

# Hospital Discharge

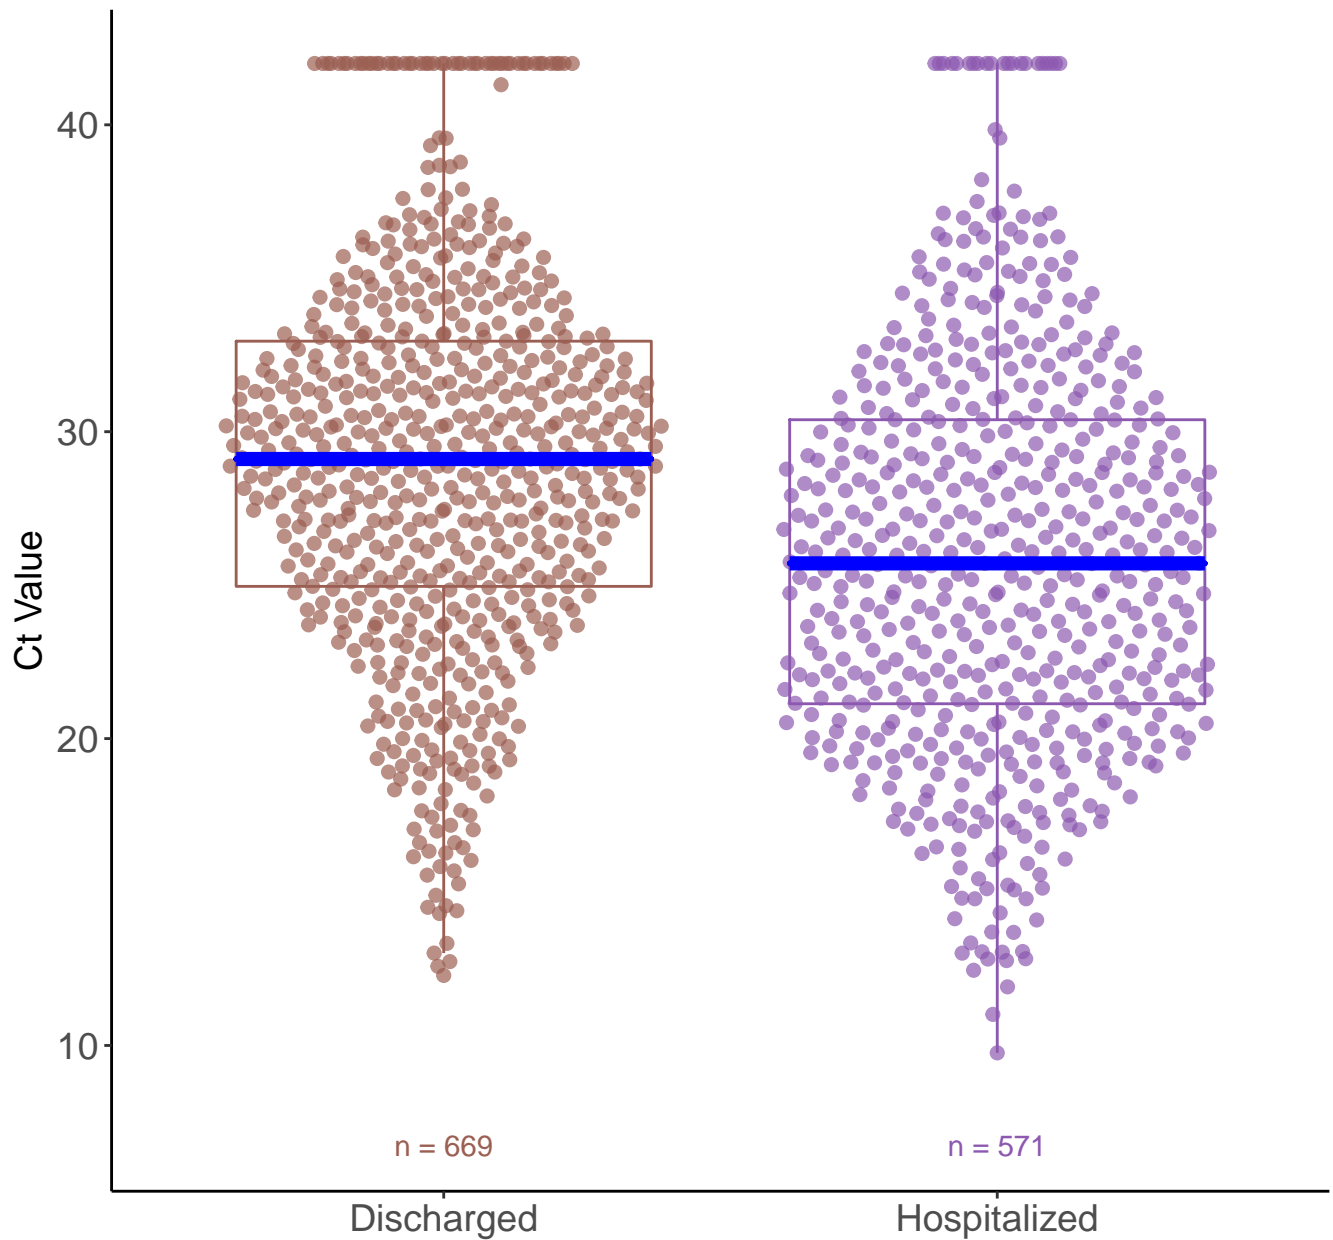

# Virology – Ct Value

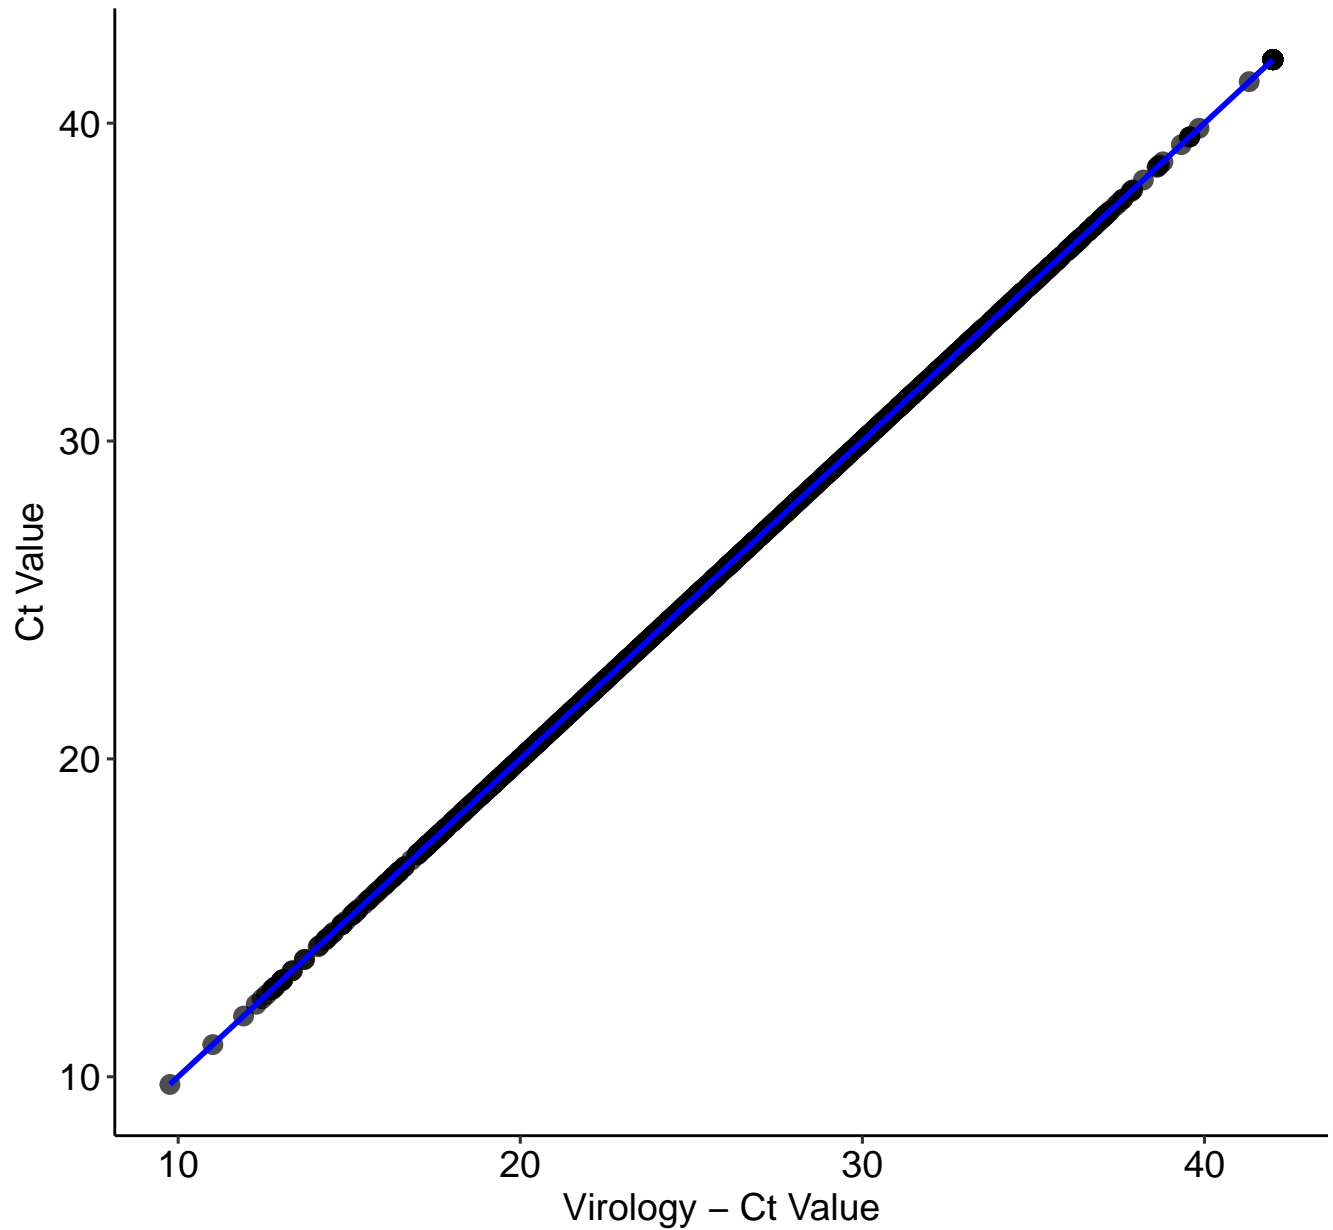

# Virology – qPCR (log10 copies/mL)

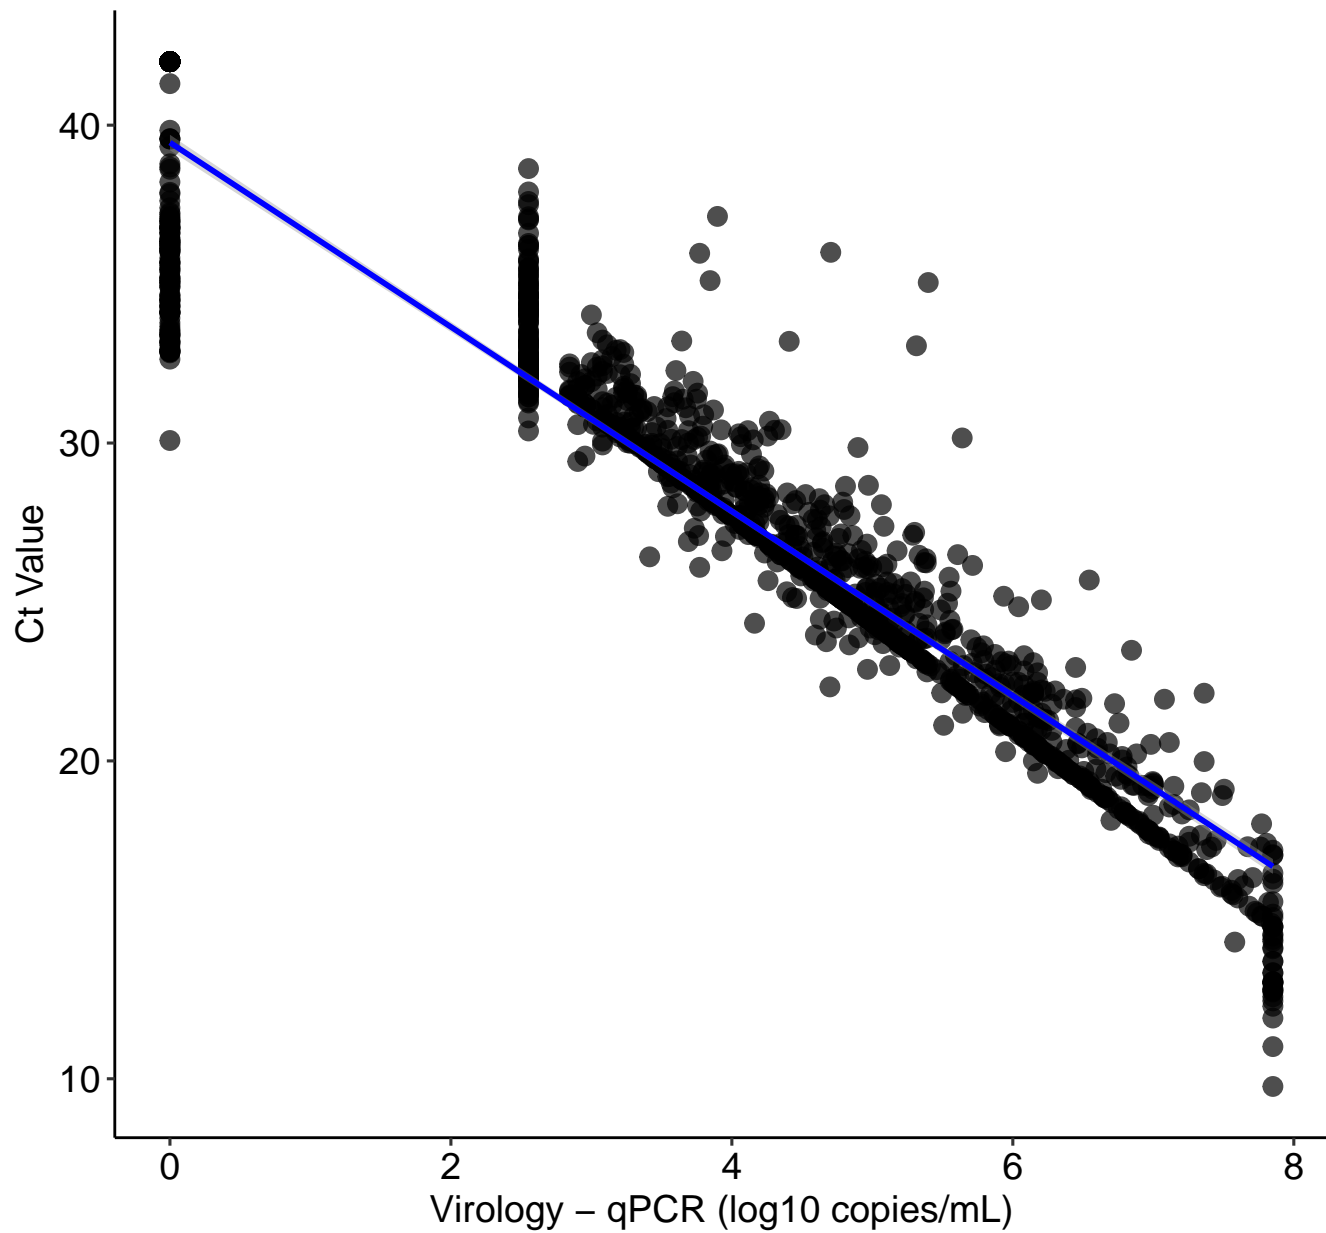



# Absolute Neutrophil Count

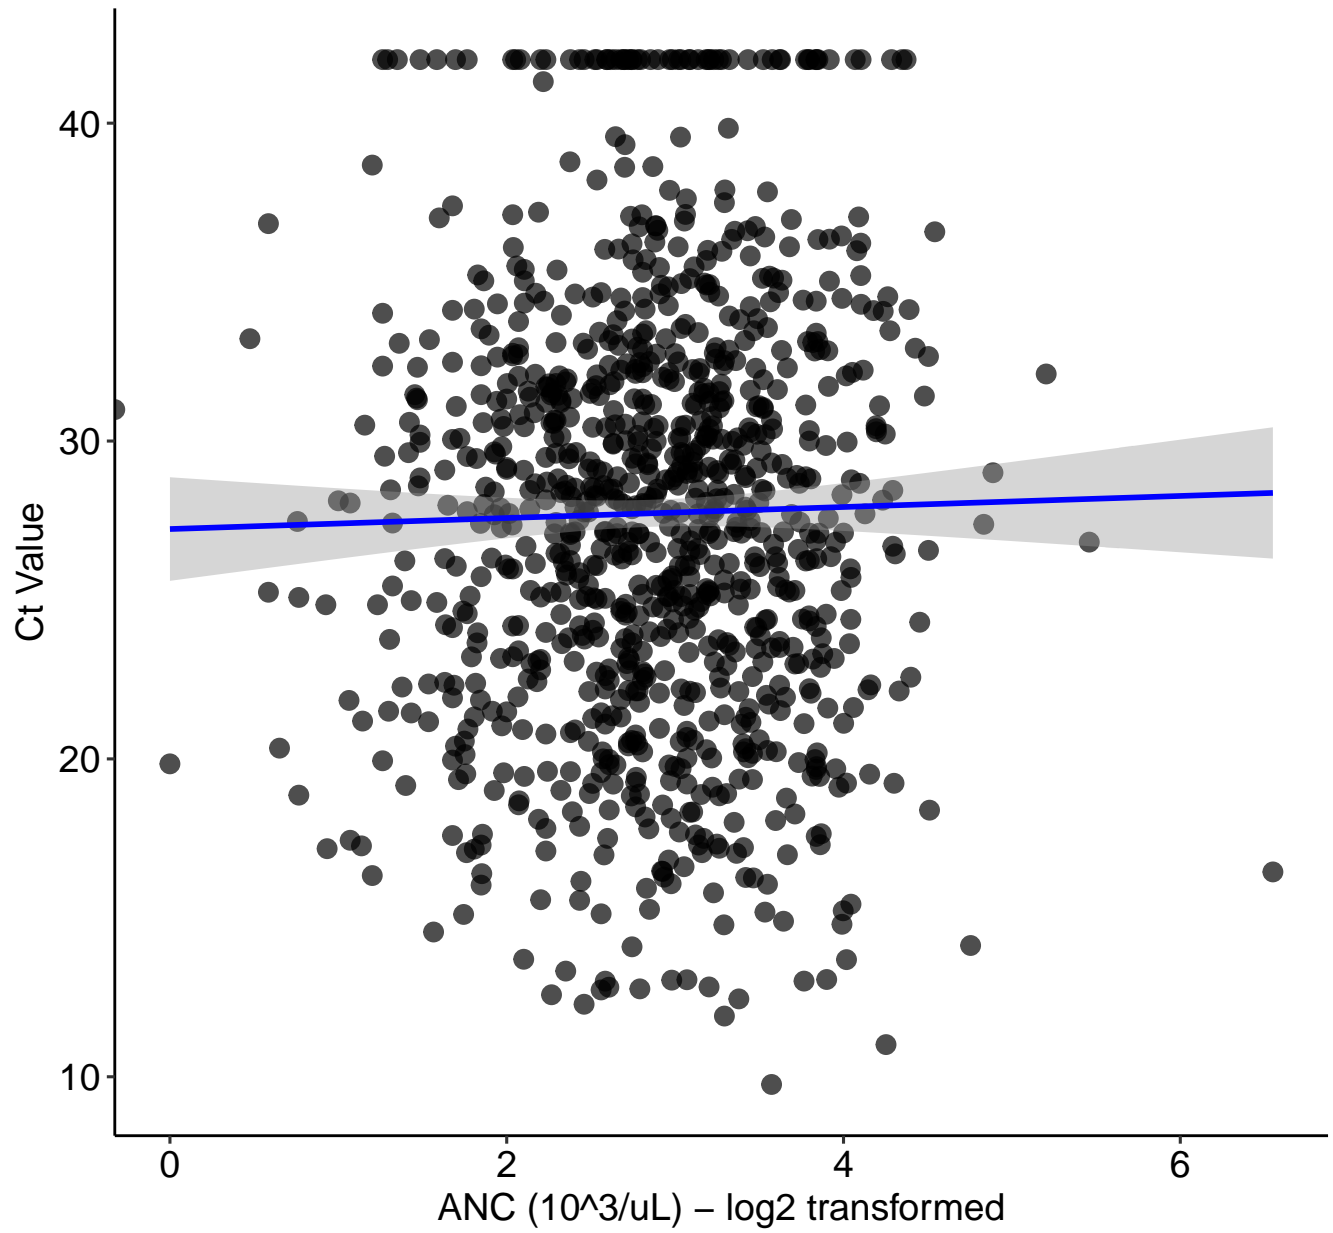

# Alanine Aminotransferase (IU/L)

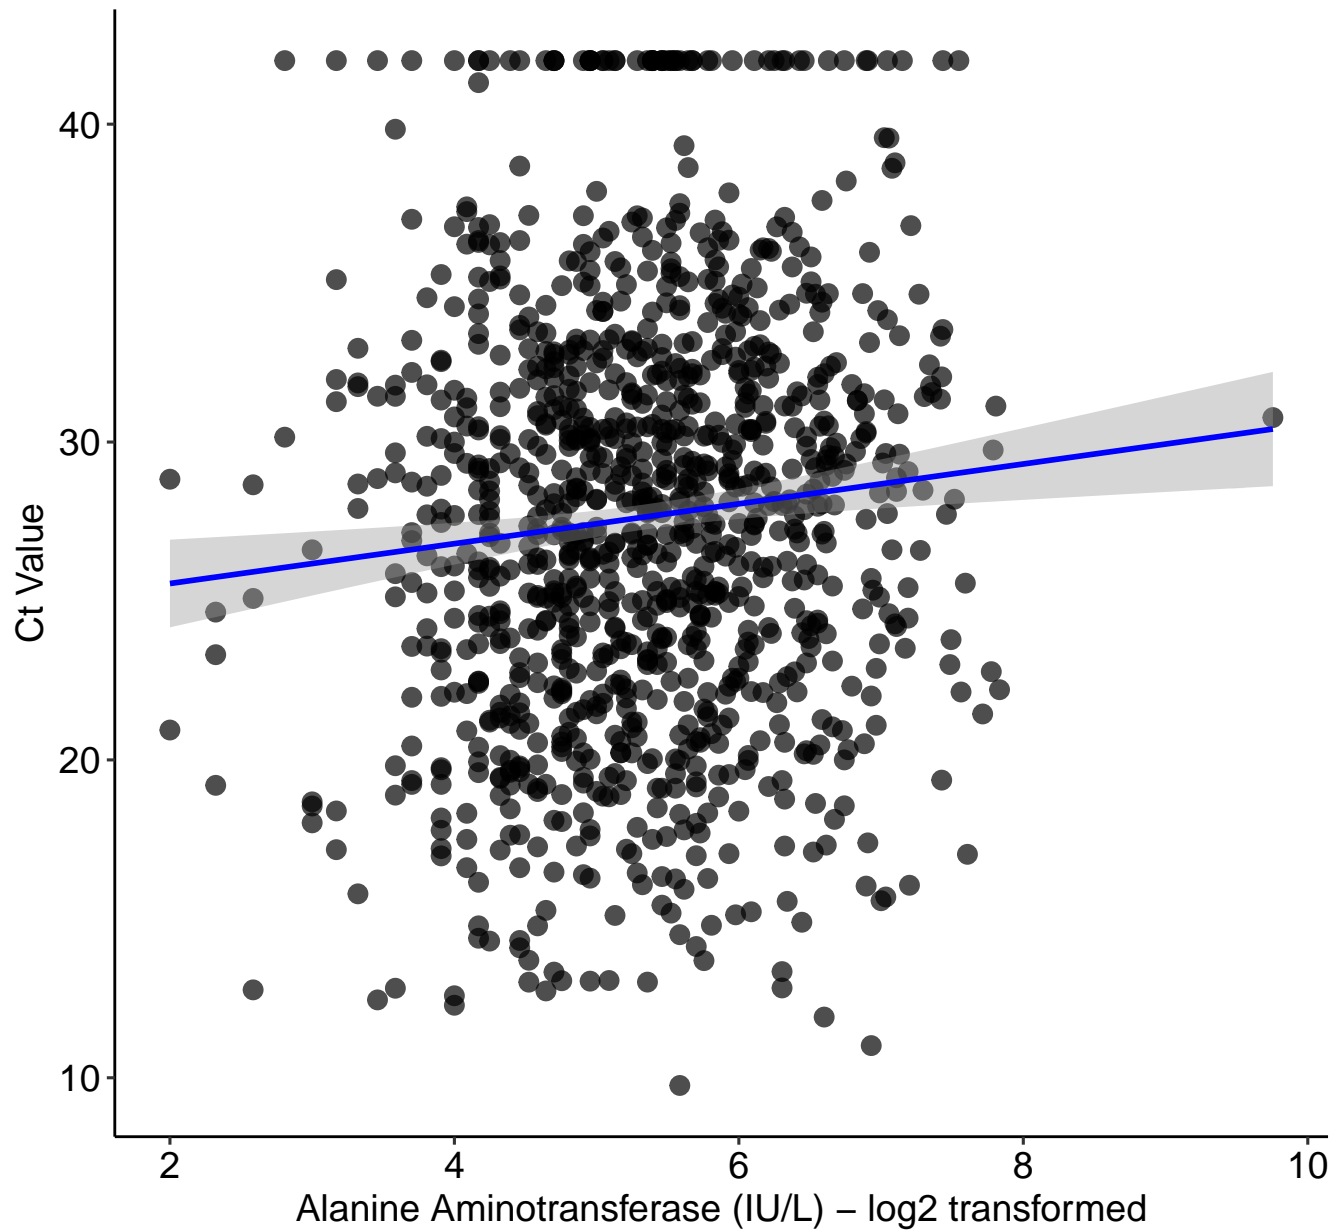

Albumin (g/L)

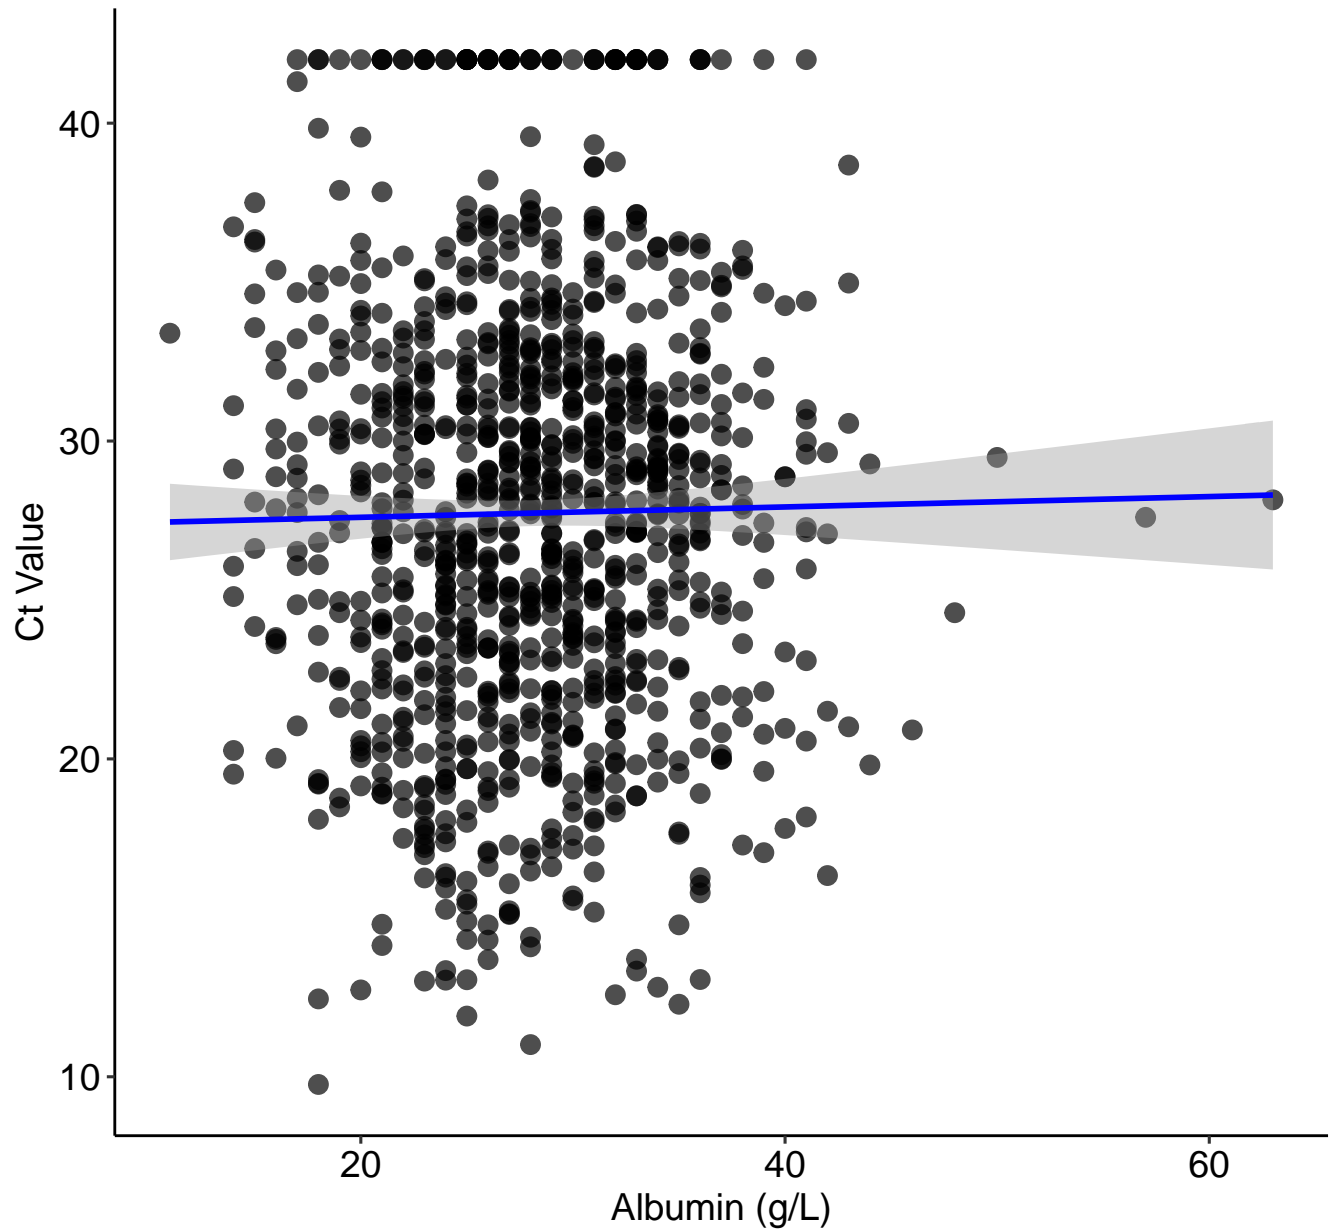

Alkaline Phosphatase (IU/L)

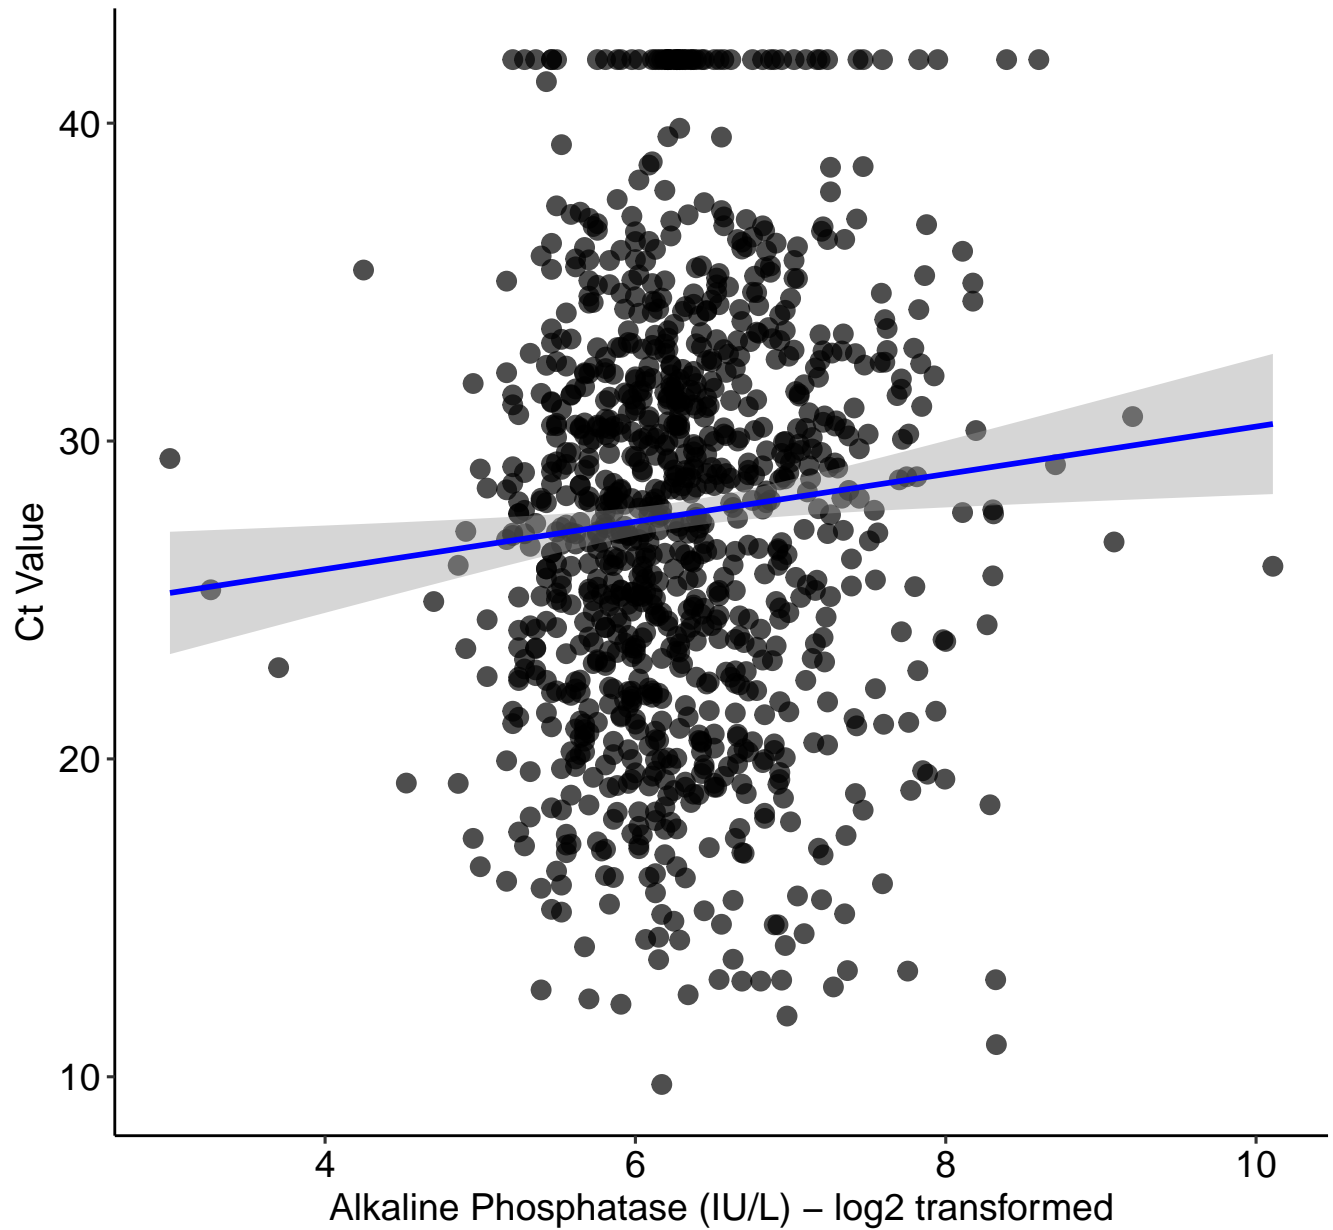

# Aspartate Aminotransferase (IU/L)

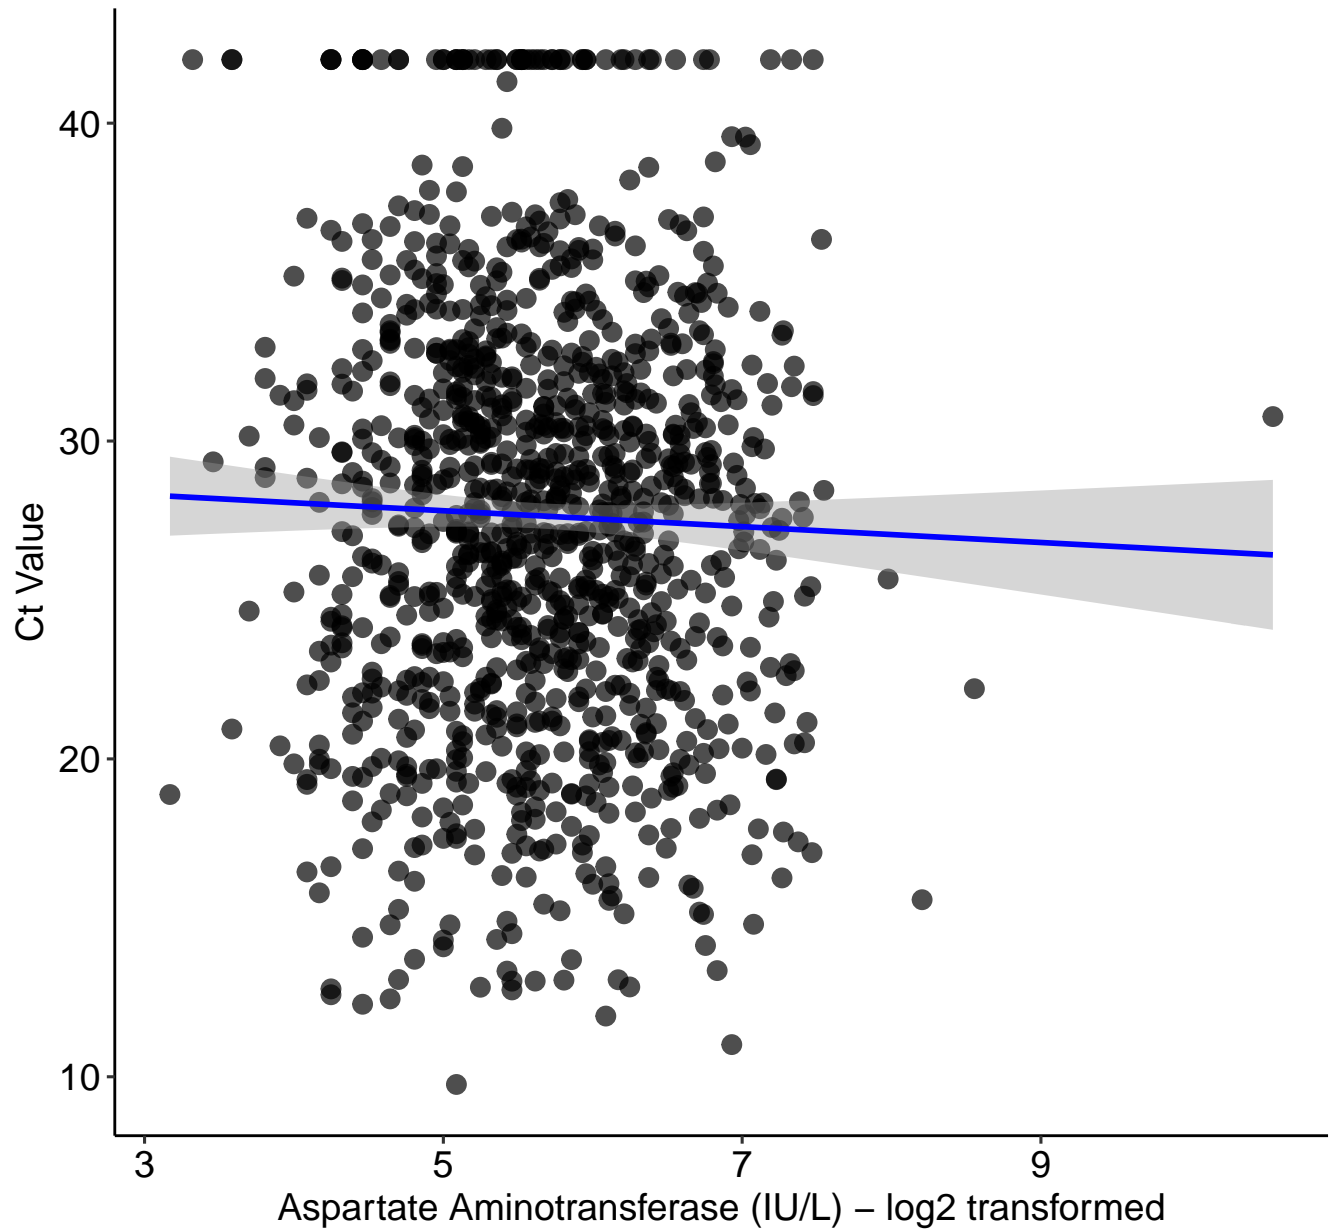

Basophils ( $10^9/L$ )

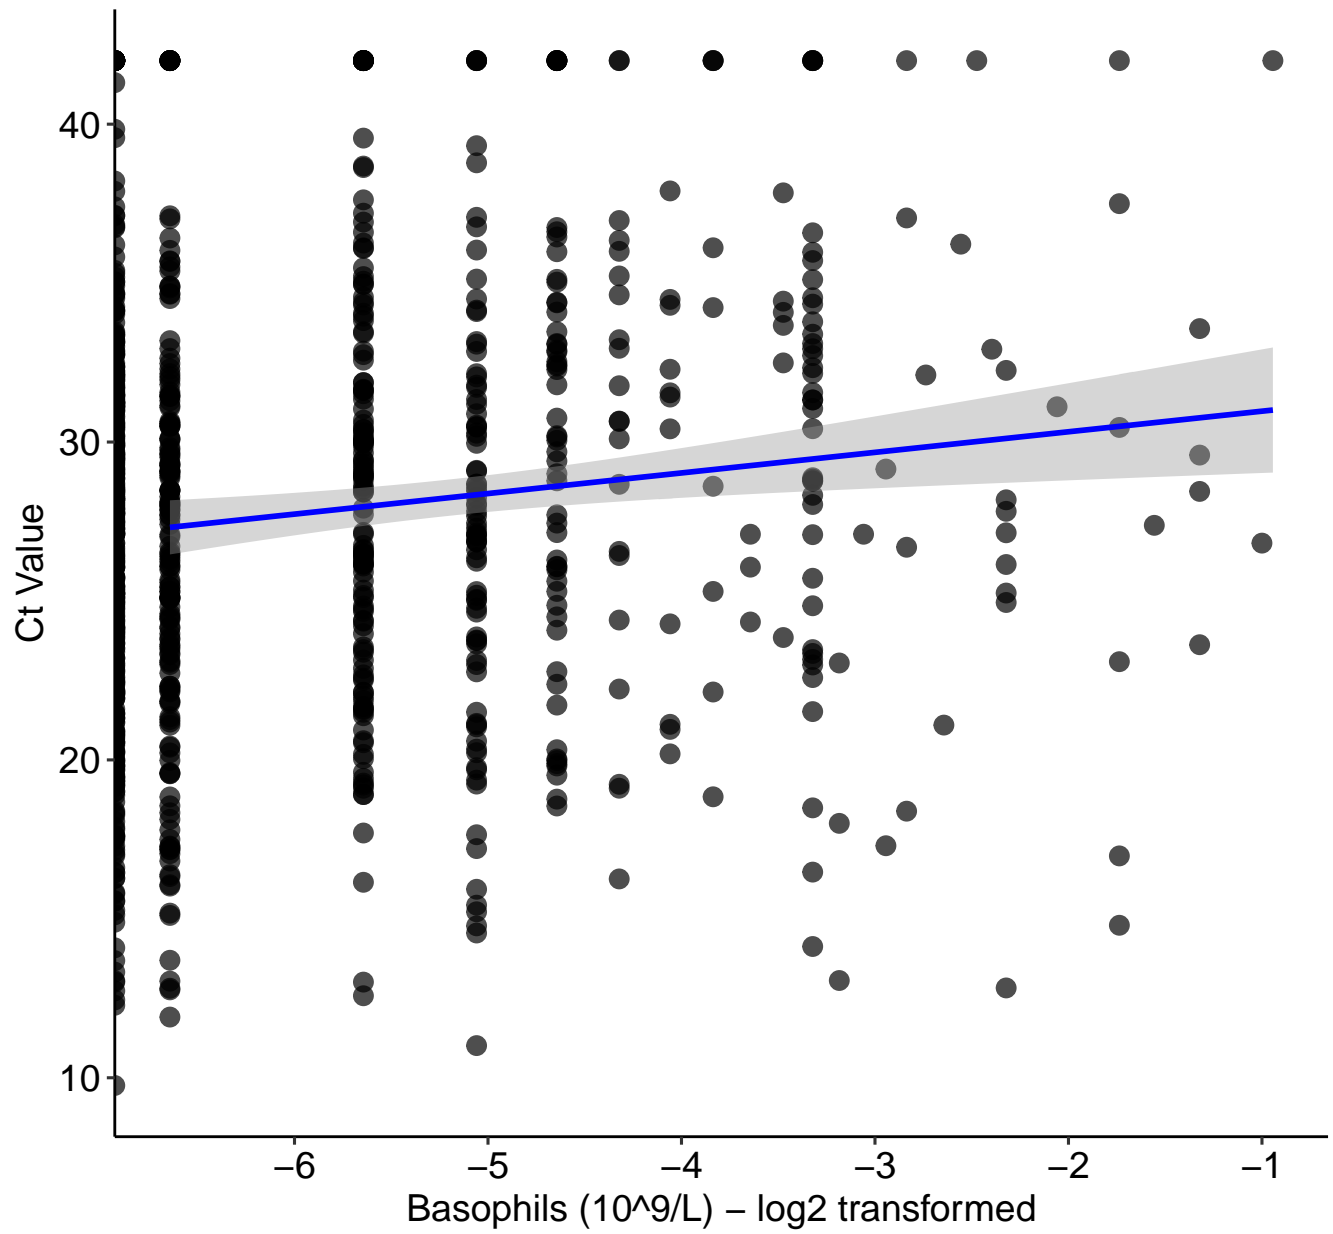

Bicarbonate (mmol/L)

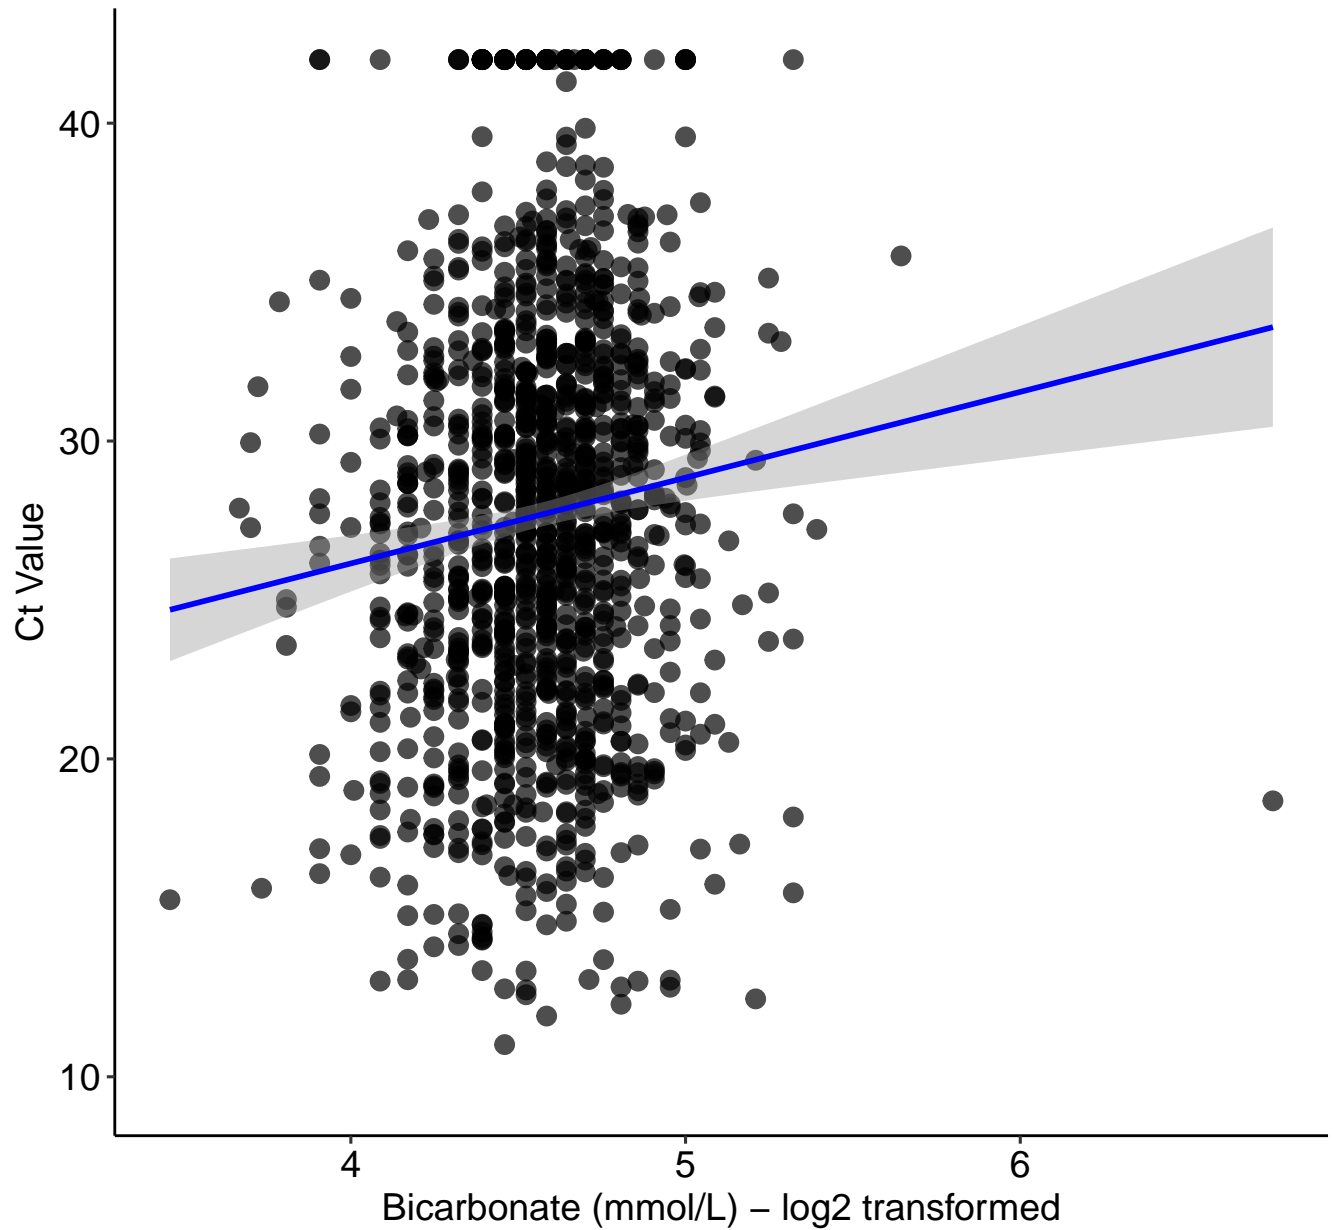

Bilirubin (umol/L)

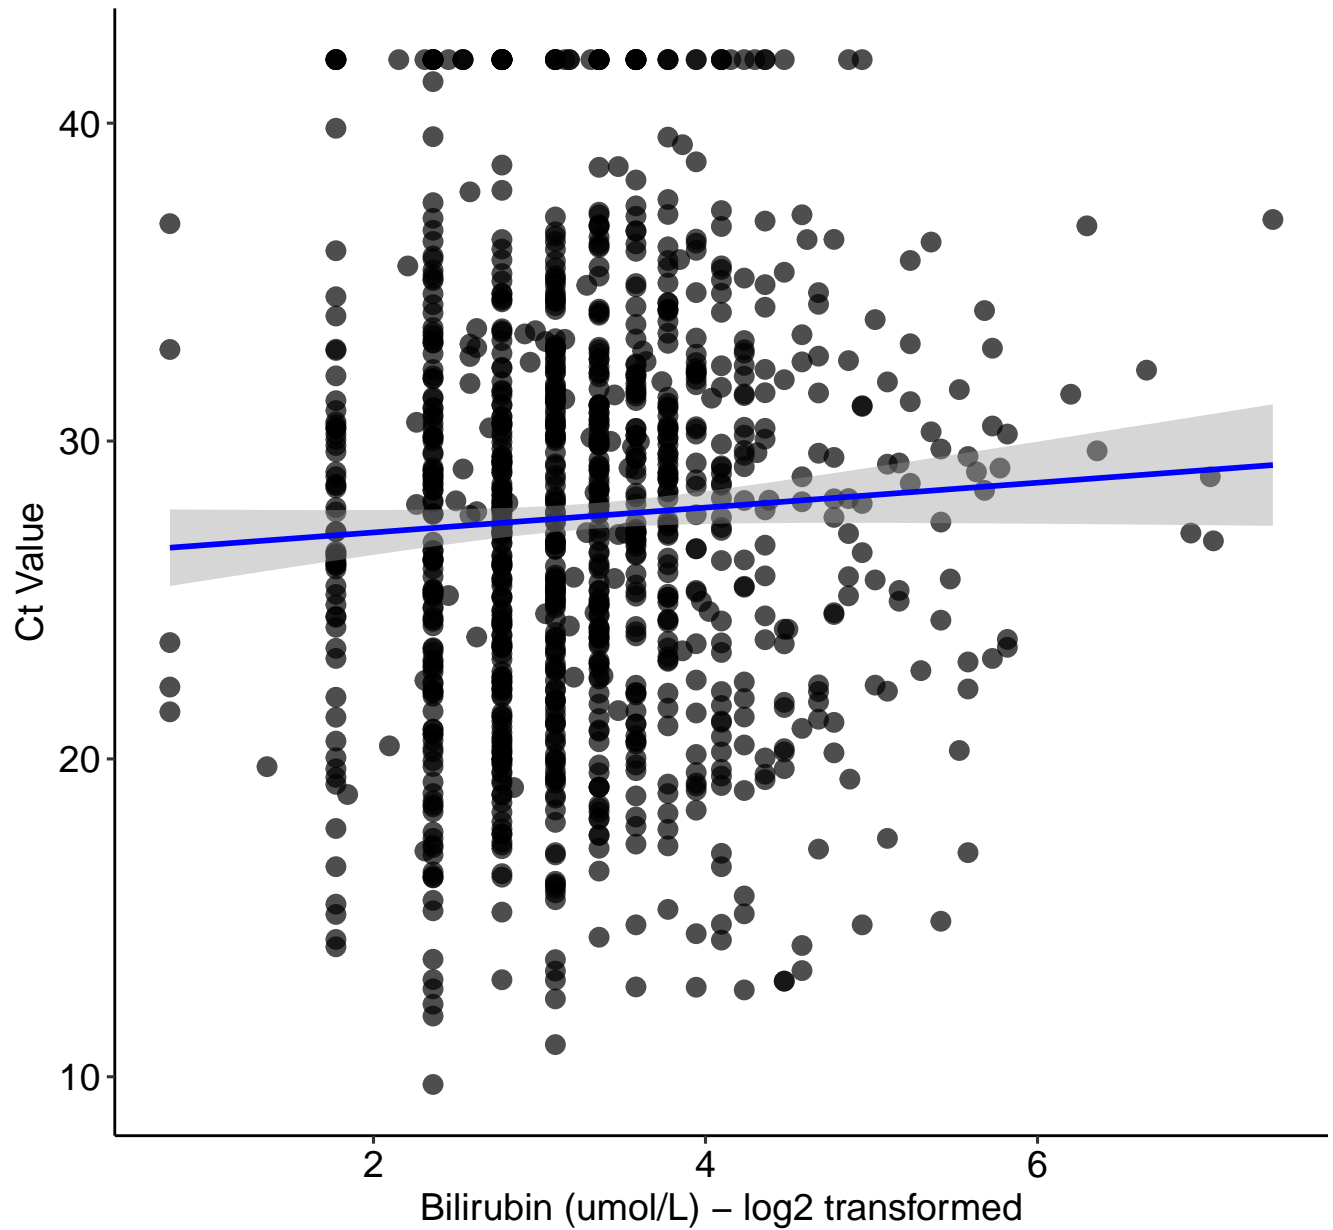



# C-reactive protein

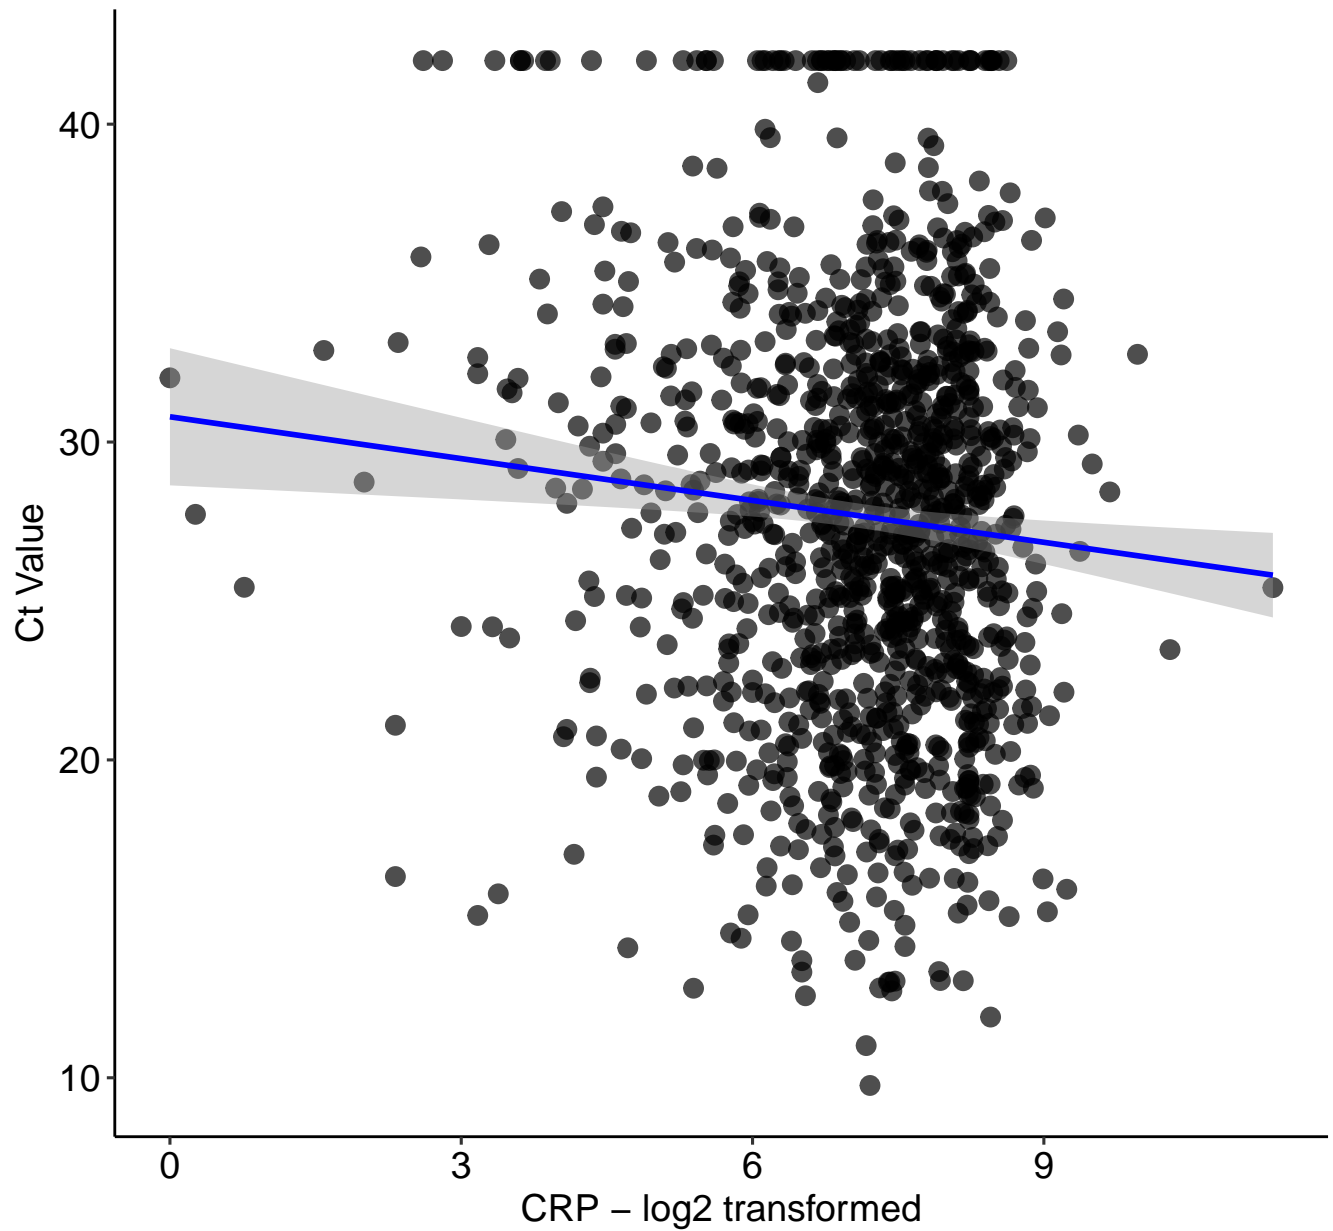

Calcium (mmol/L)

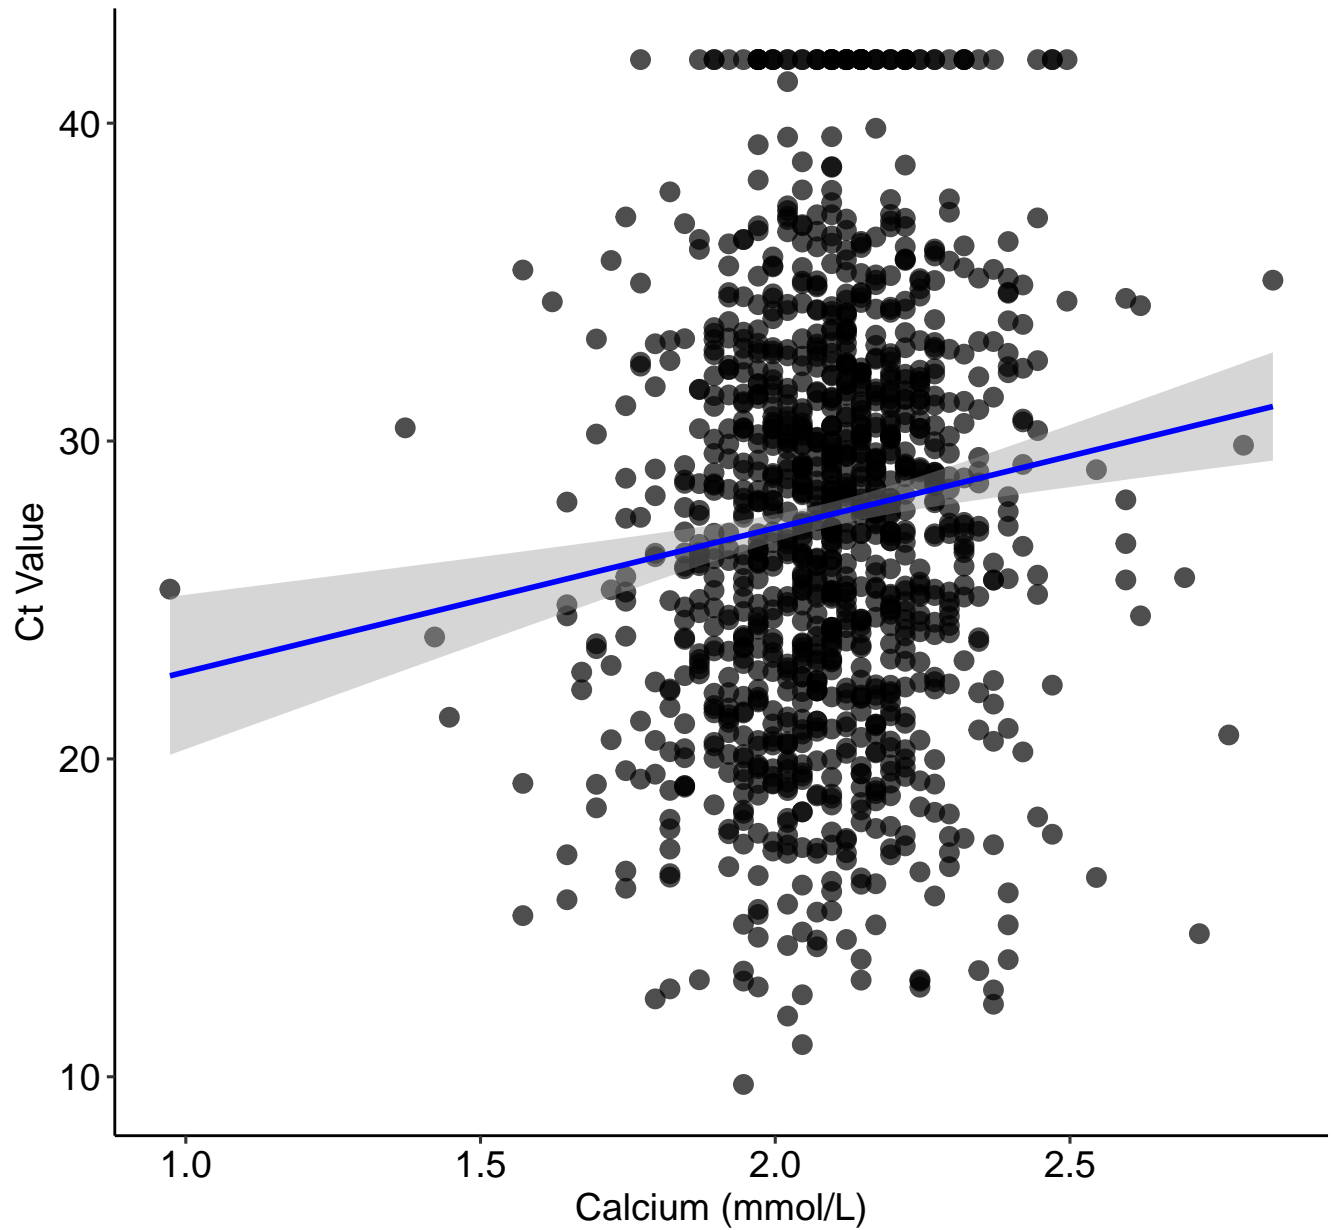

Chloride (mmol/L)

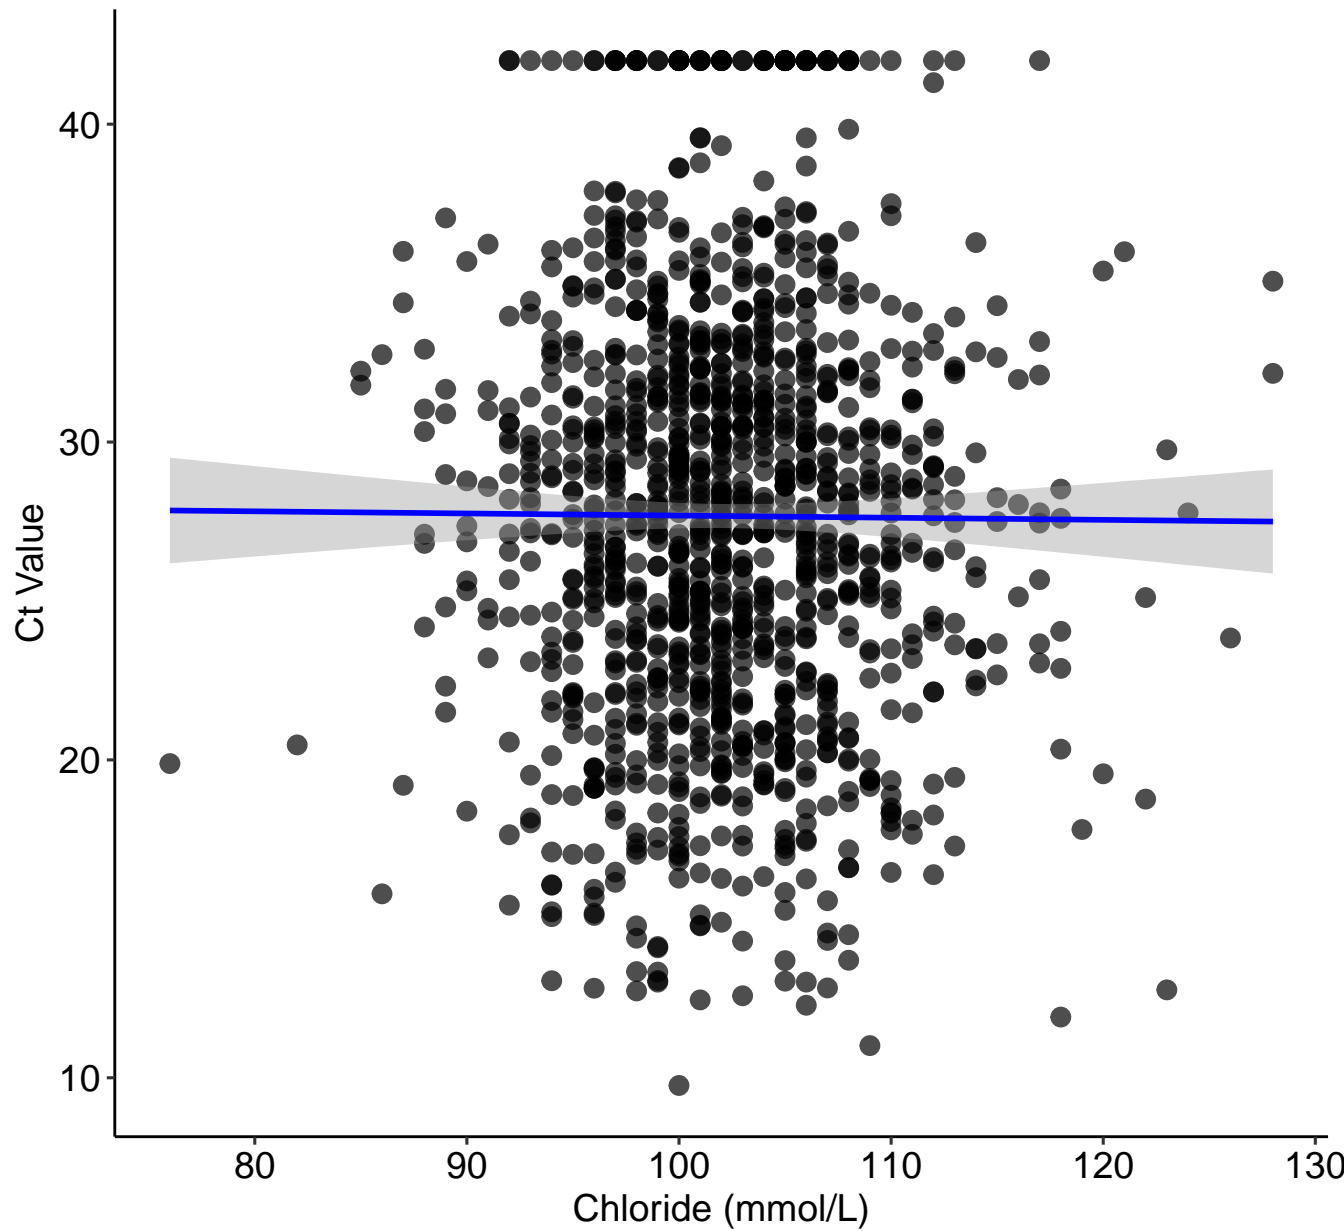

Creatinine (umol/L)

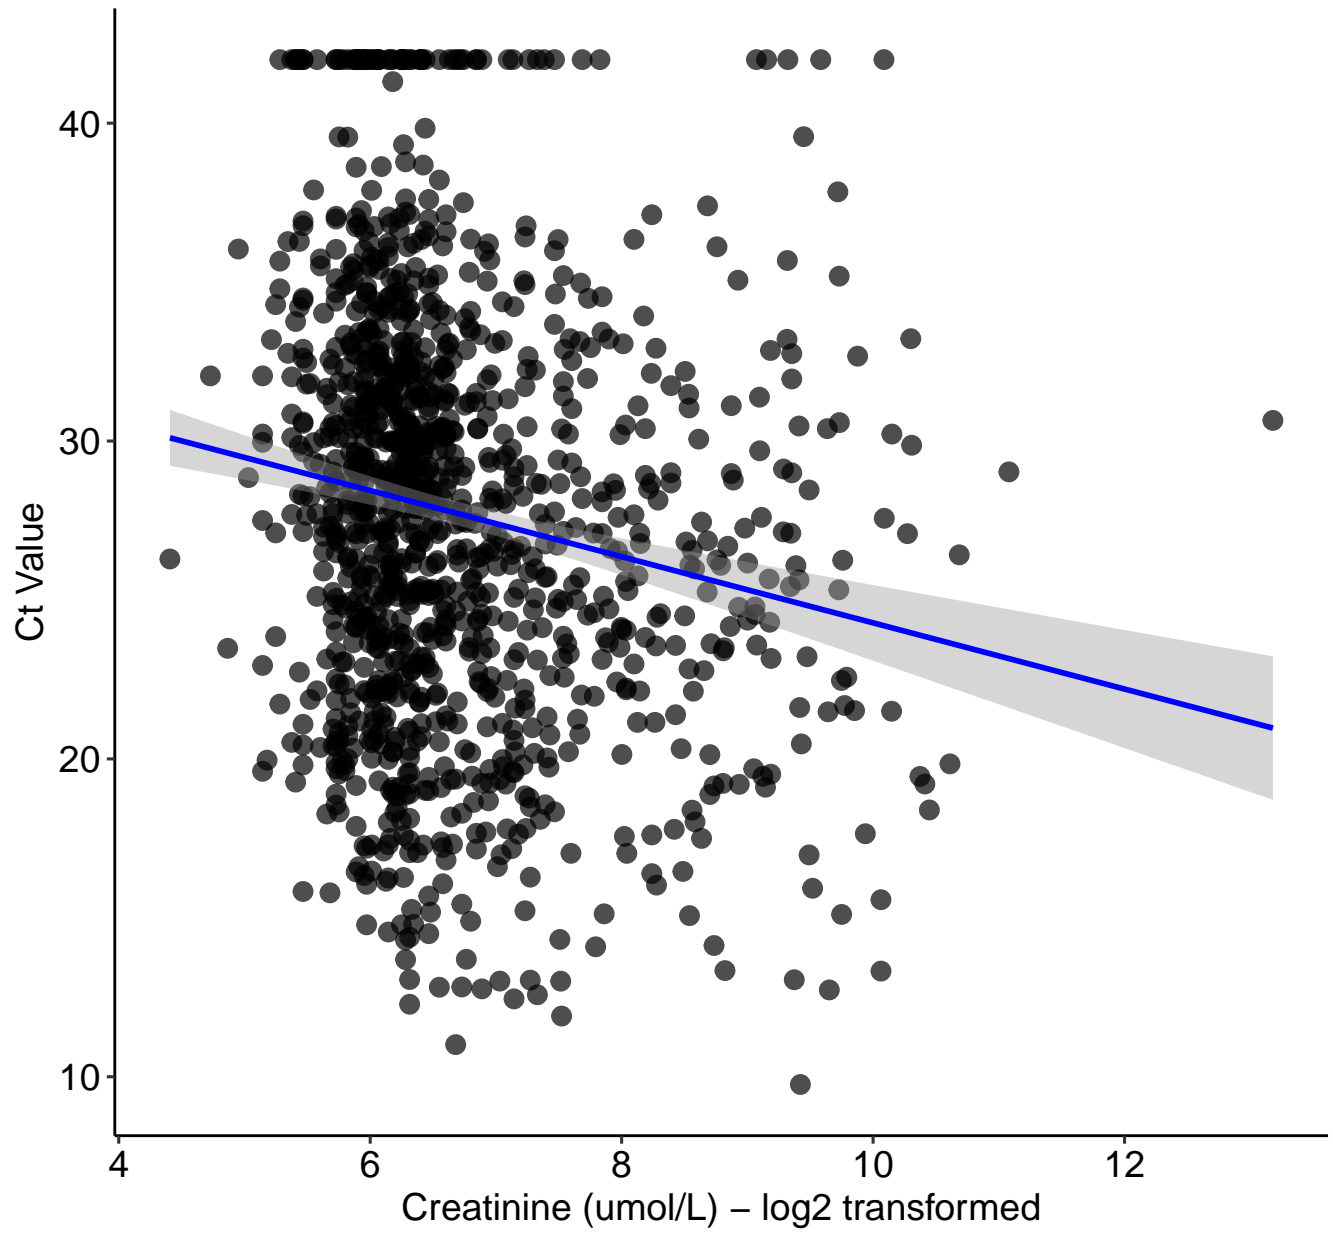

Eosinophils ( $10^9/L$ )

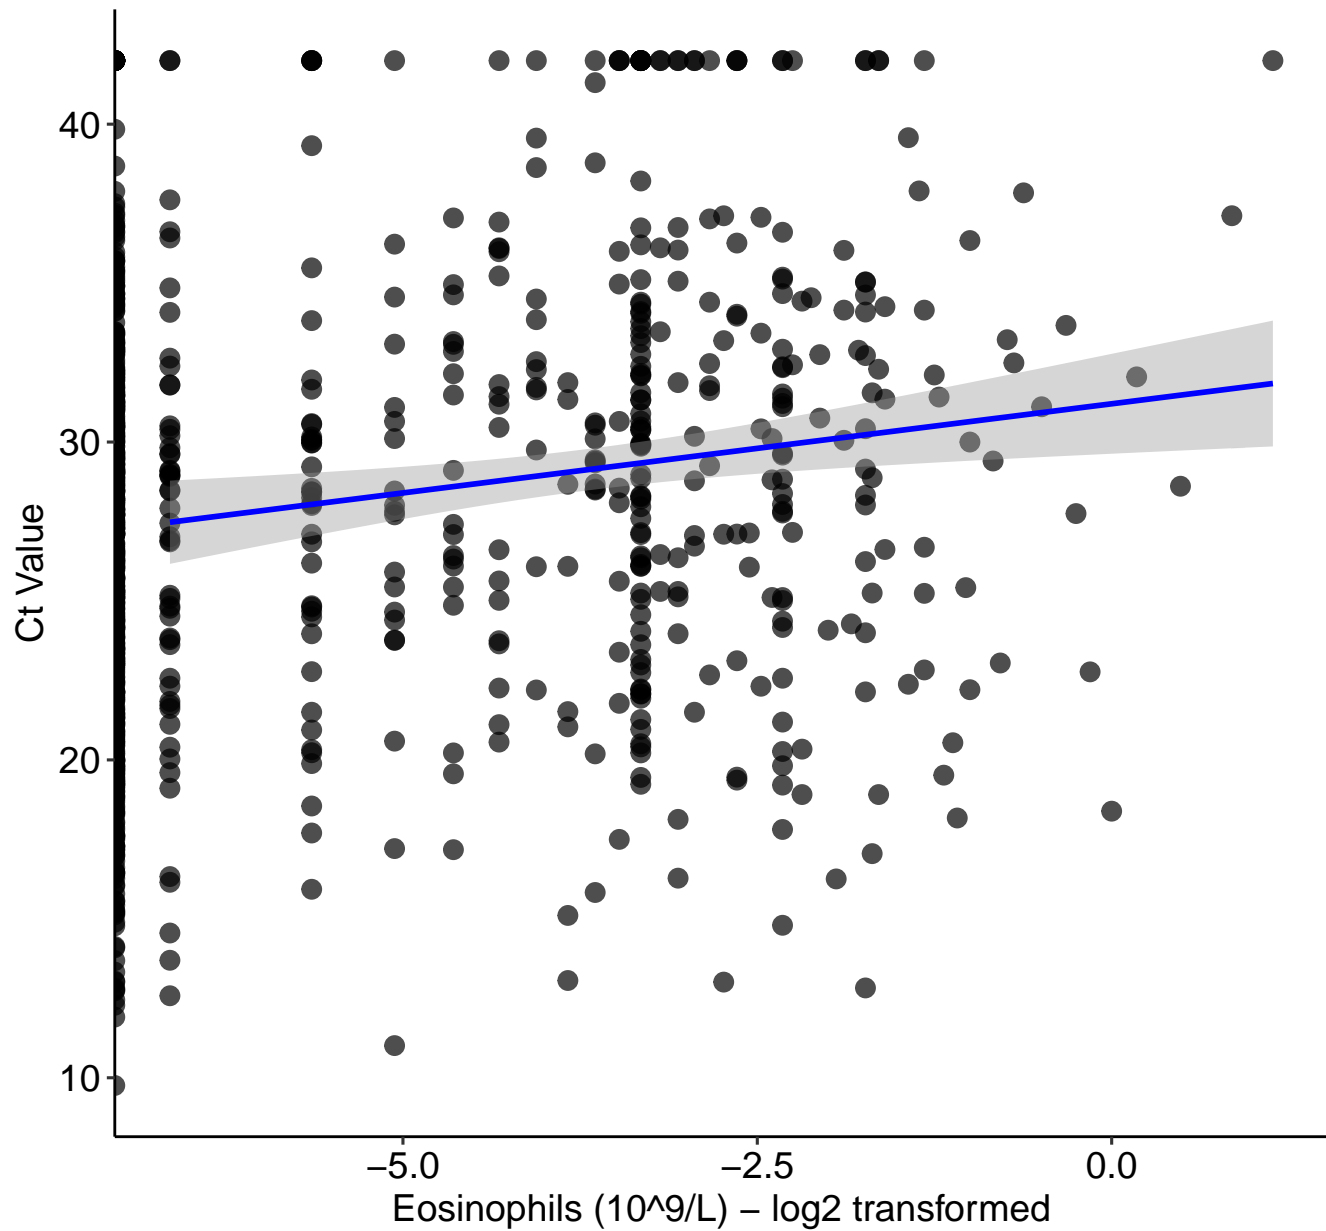

Erythrocytes ( $10^{12}/L$ )

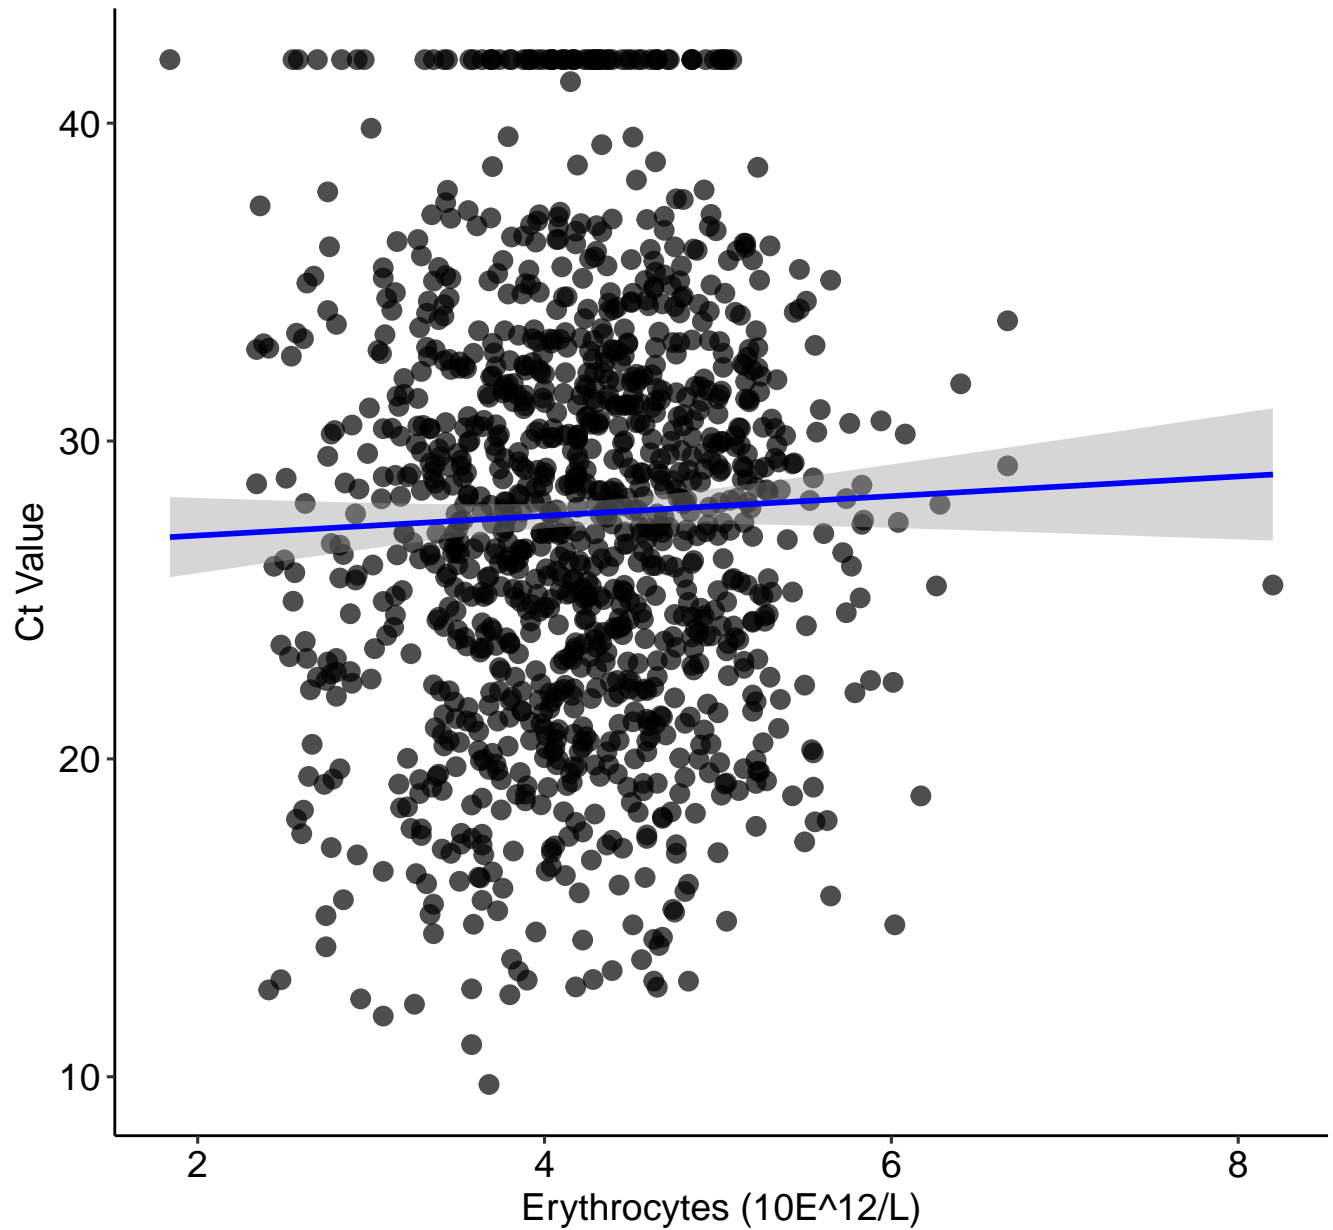

Glucose (mmol/L)

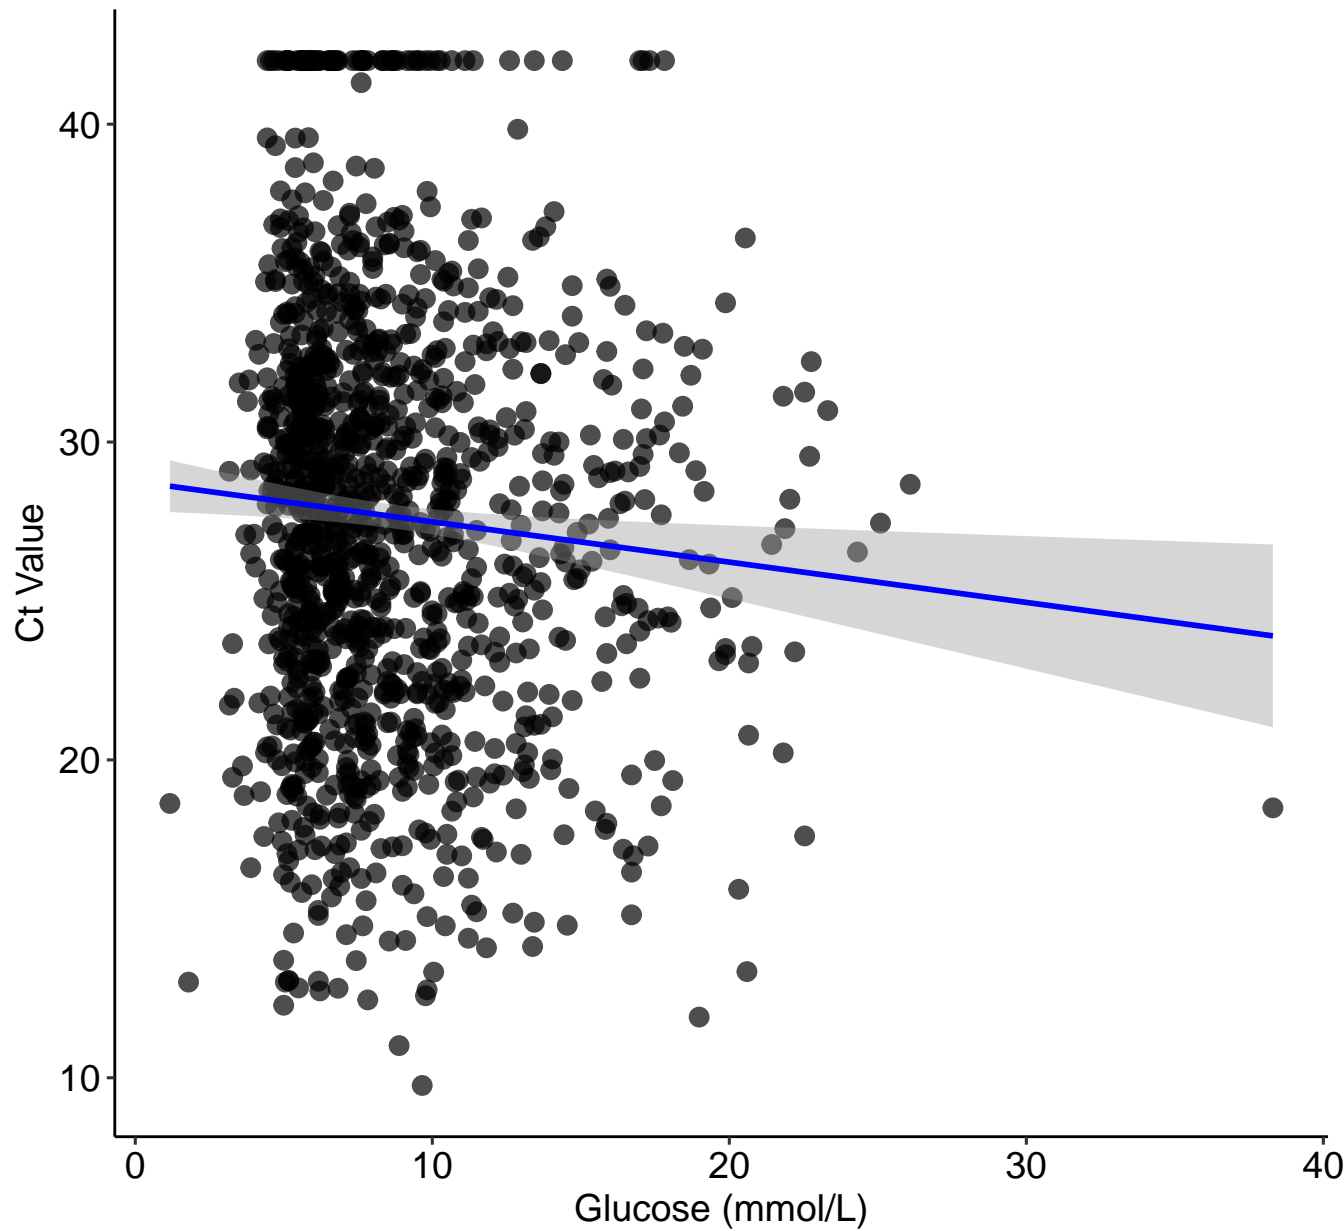

Hematocrit (L/L)

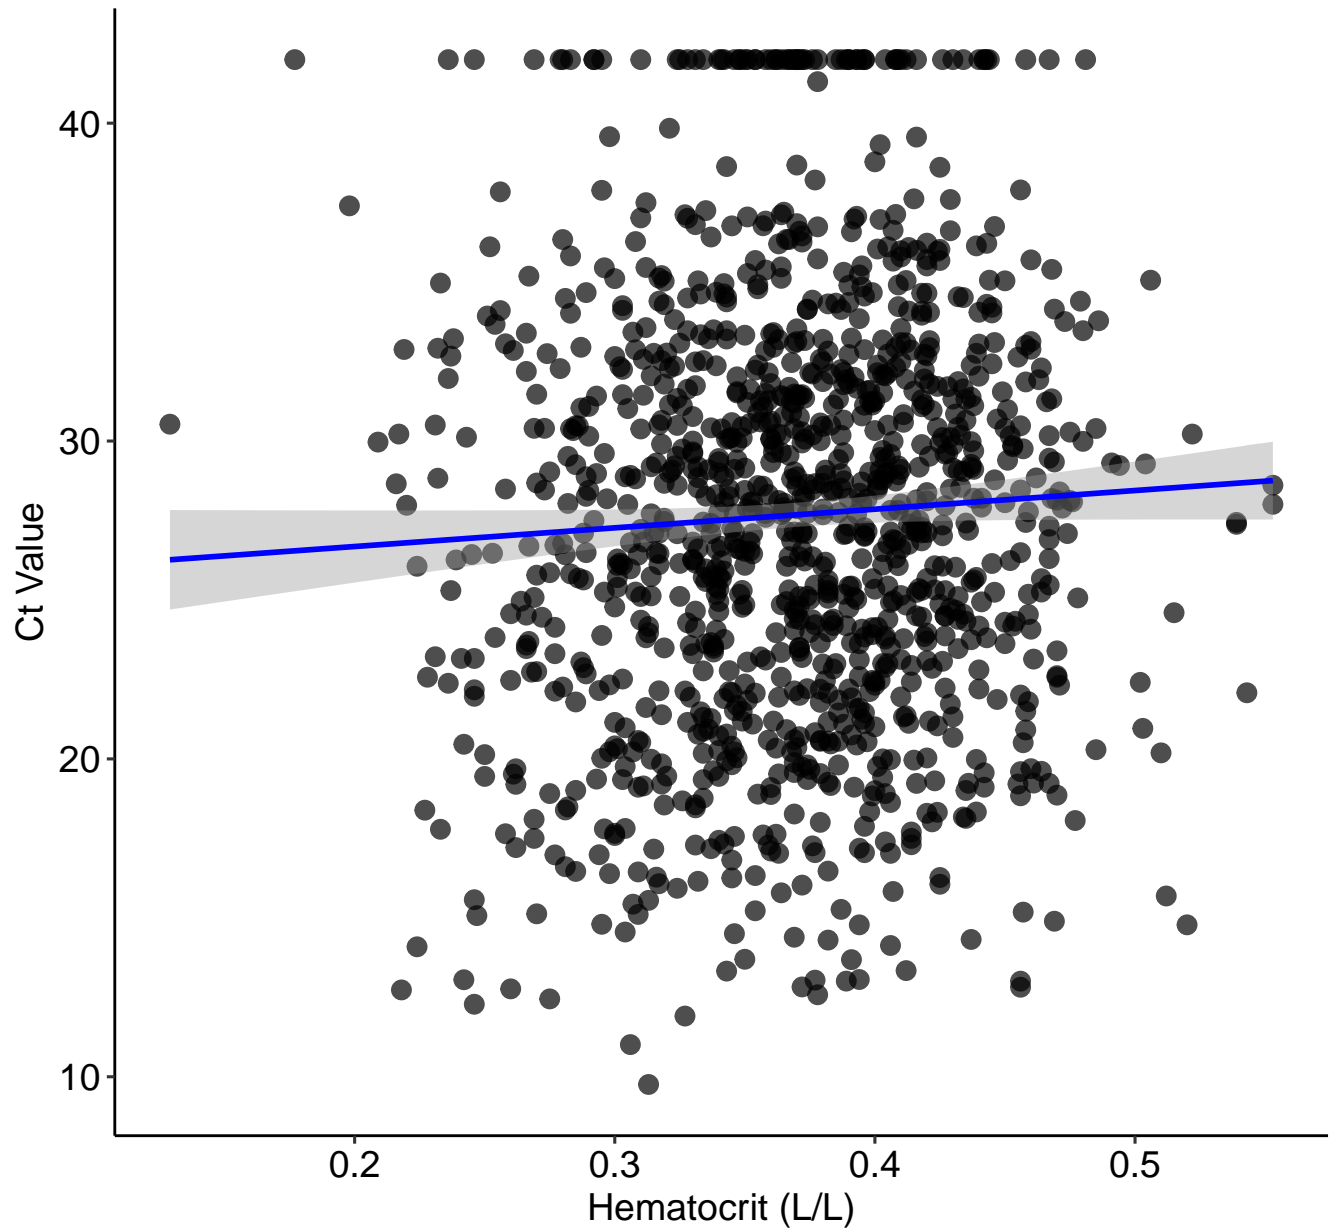



Hemoglobin (g/L)

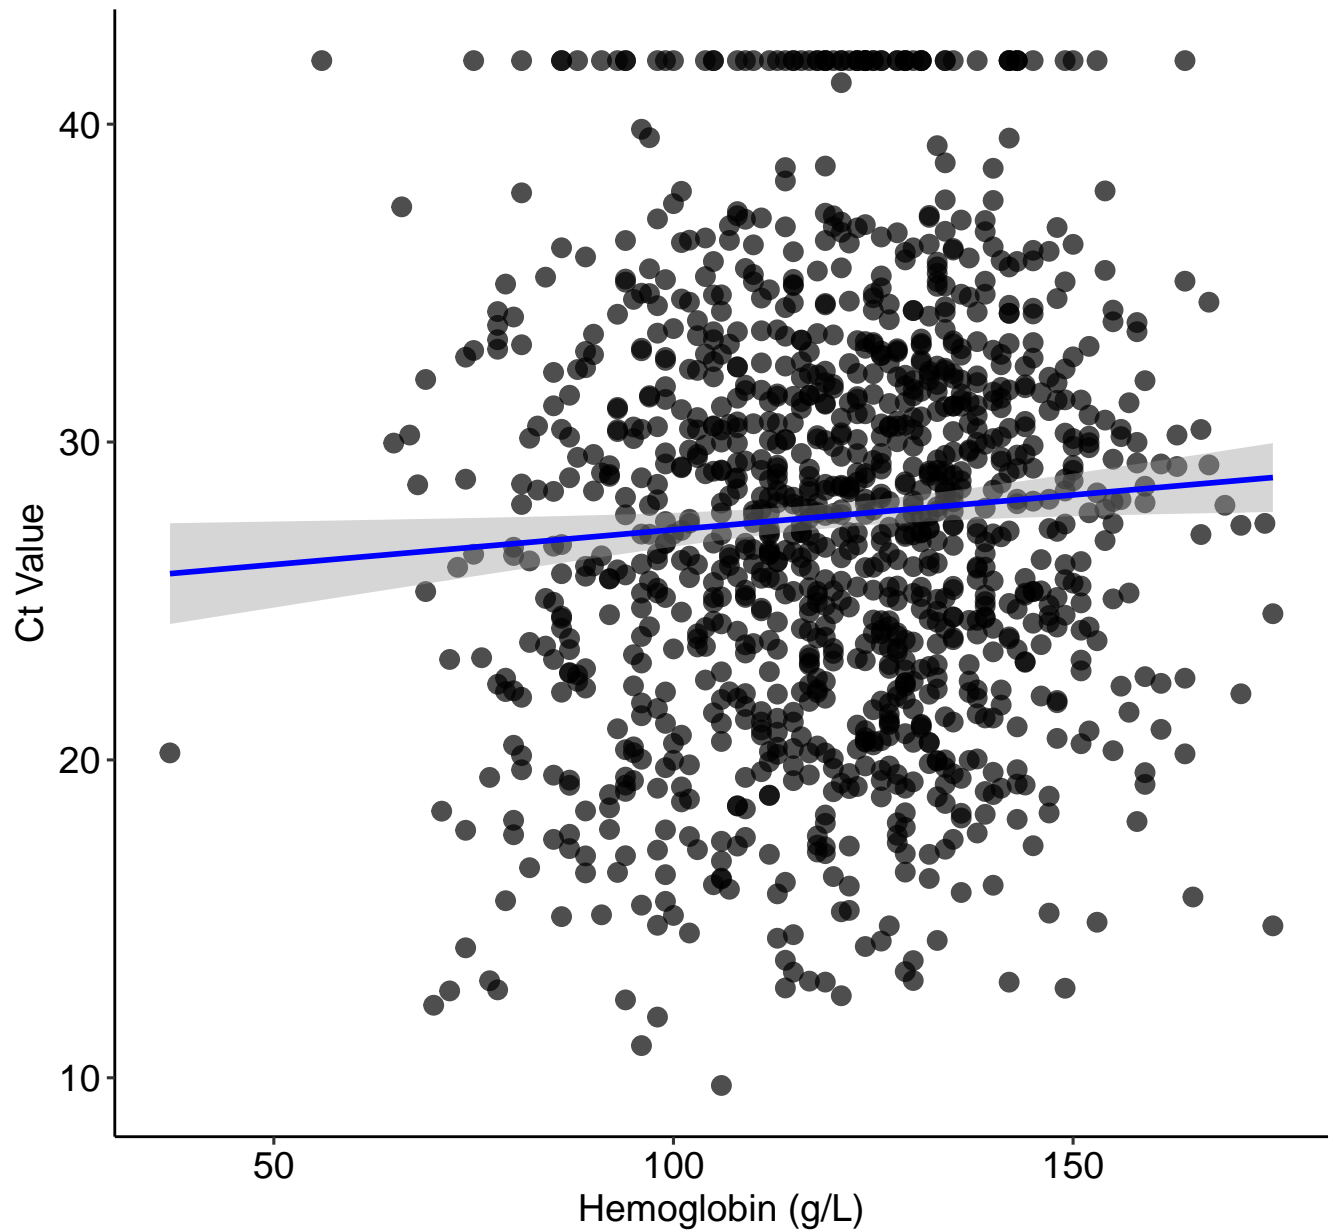

Interleukin 6 (pg/mL)

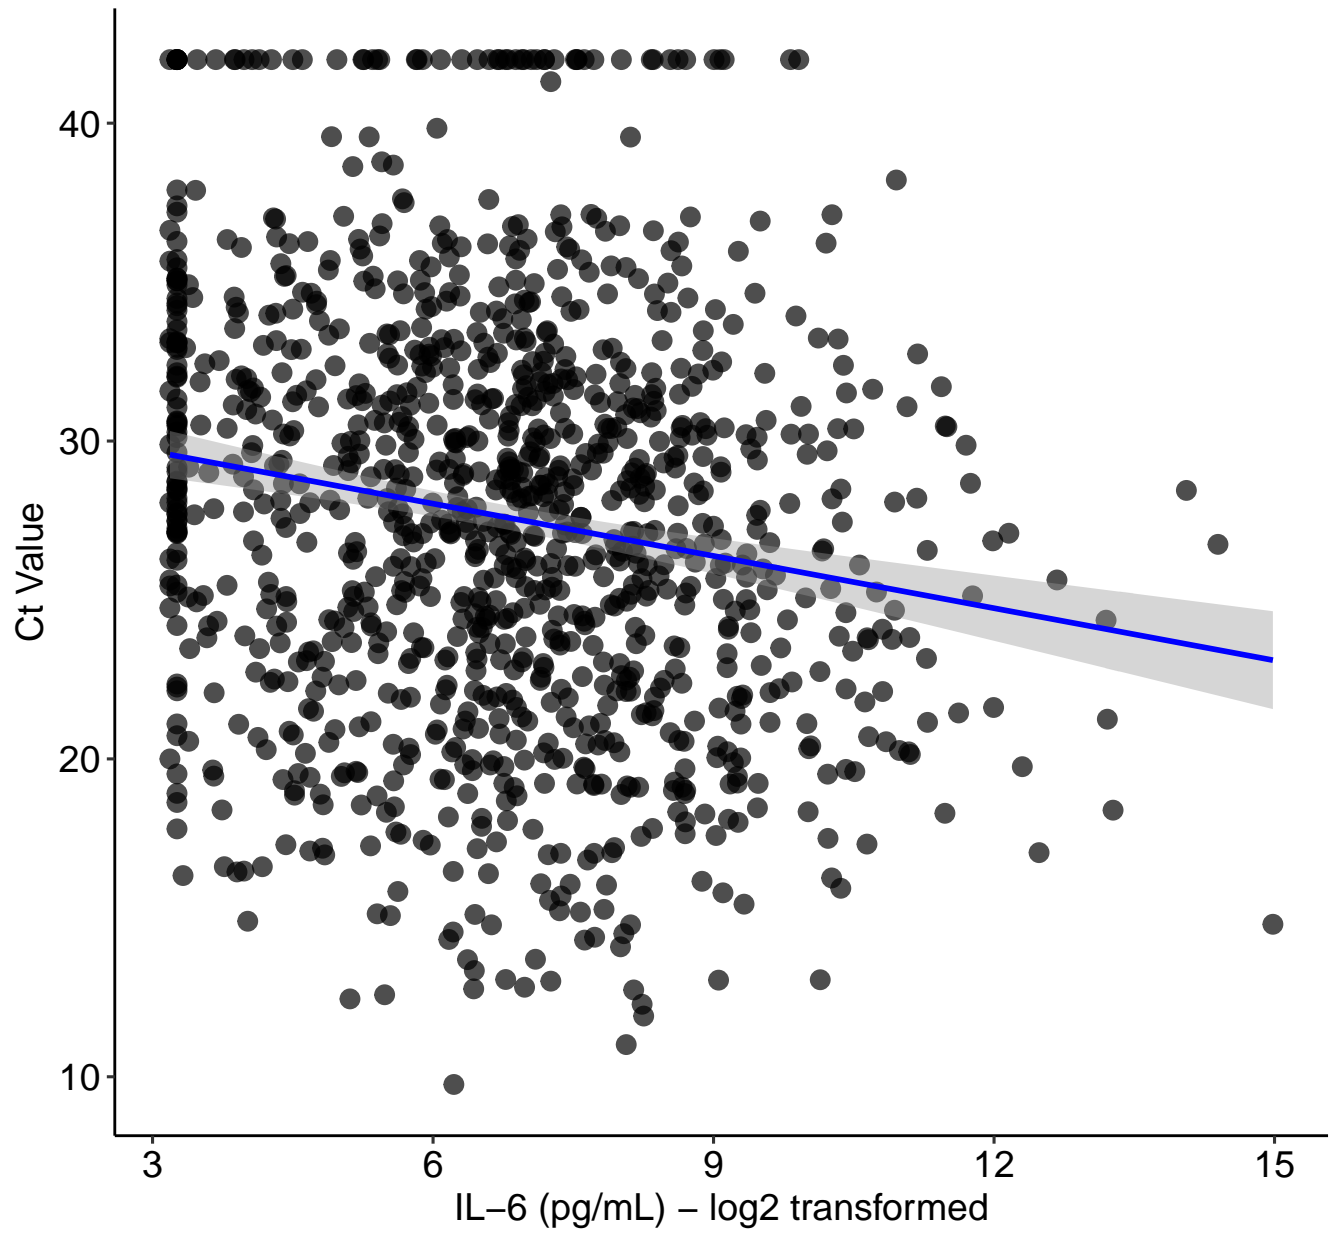

# Lactate Dehydrogenase (IU/L)

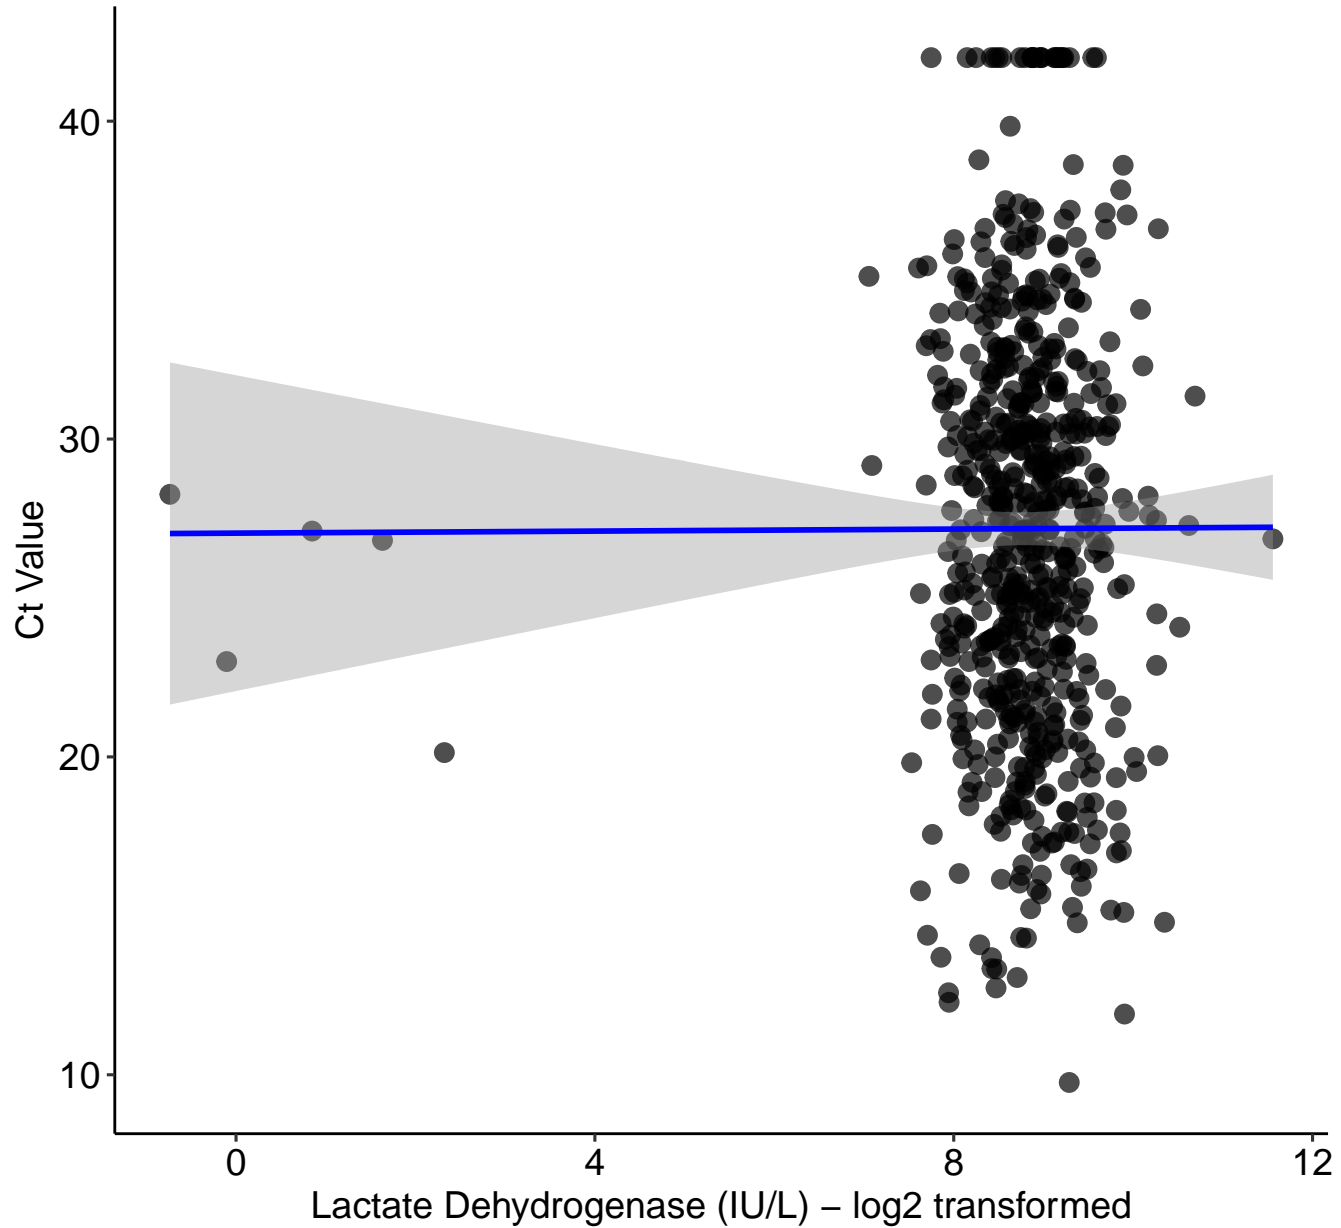

# LDL Cholesterol (mmol/L)

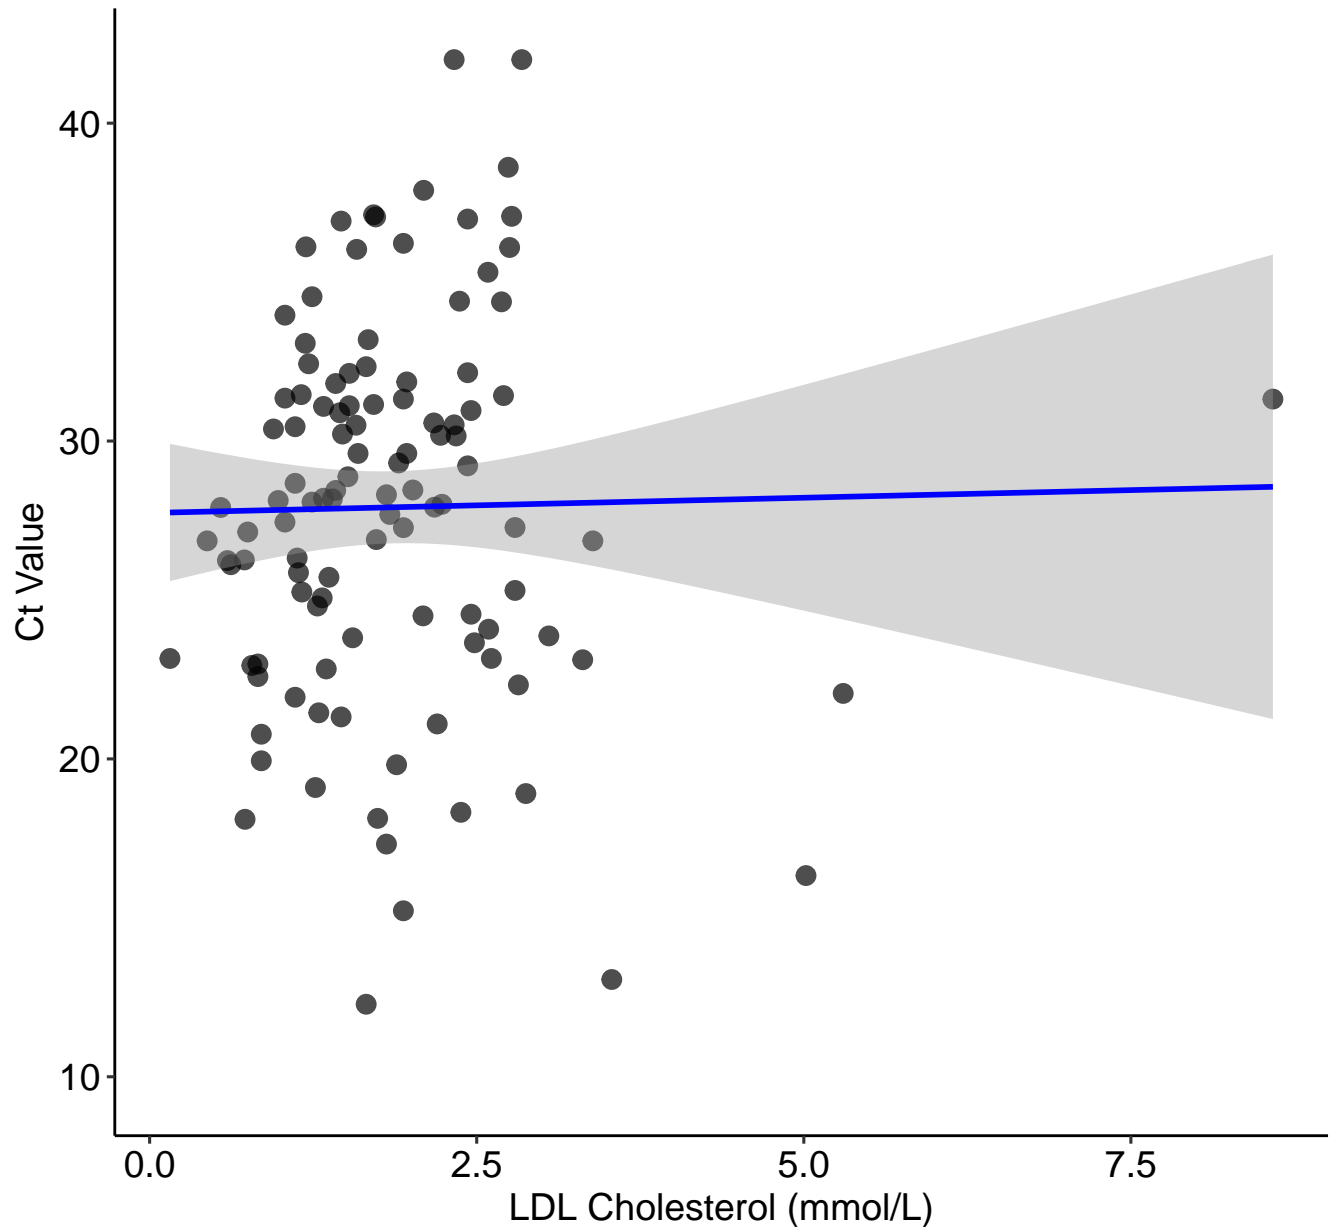

Leukocytes ( $10^9/L$ )

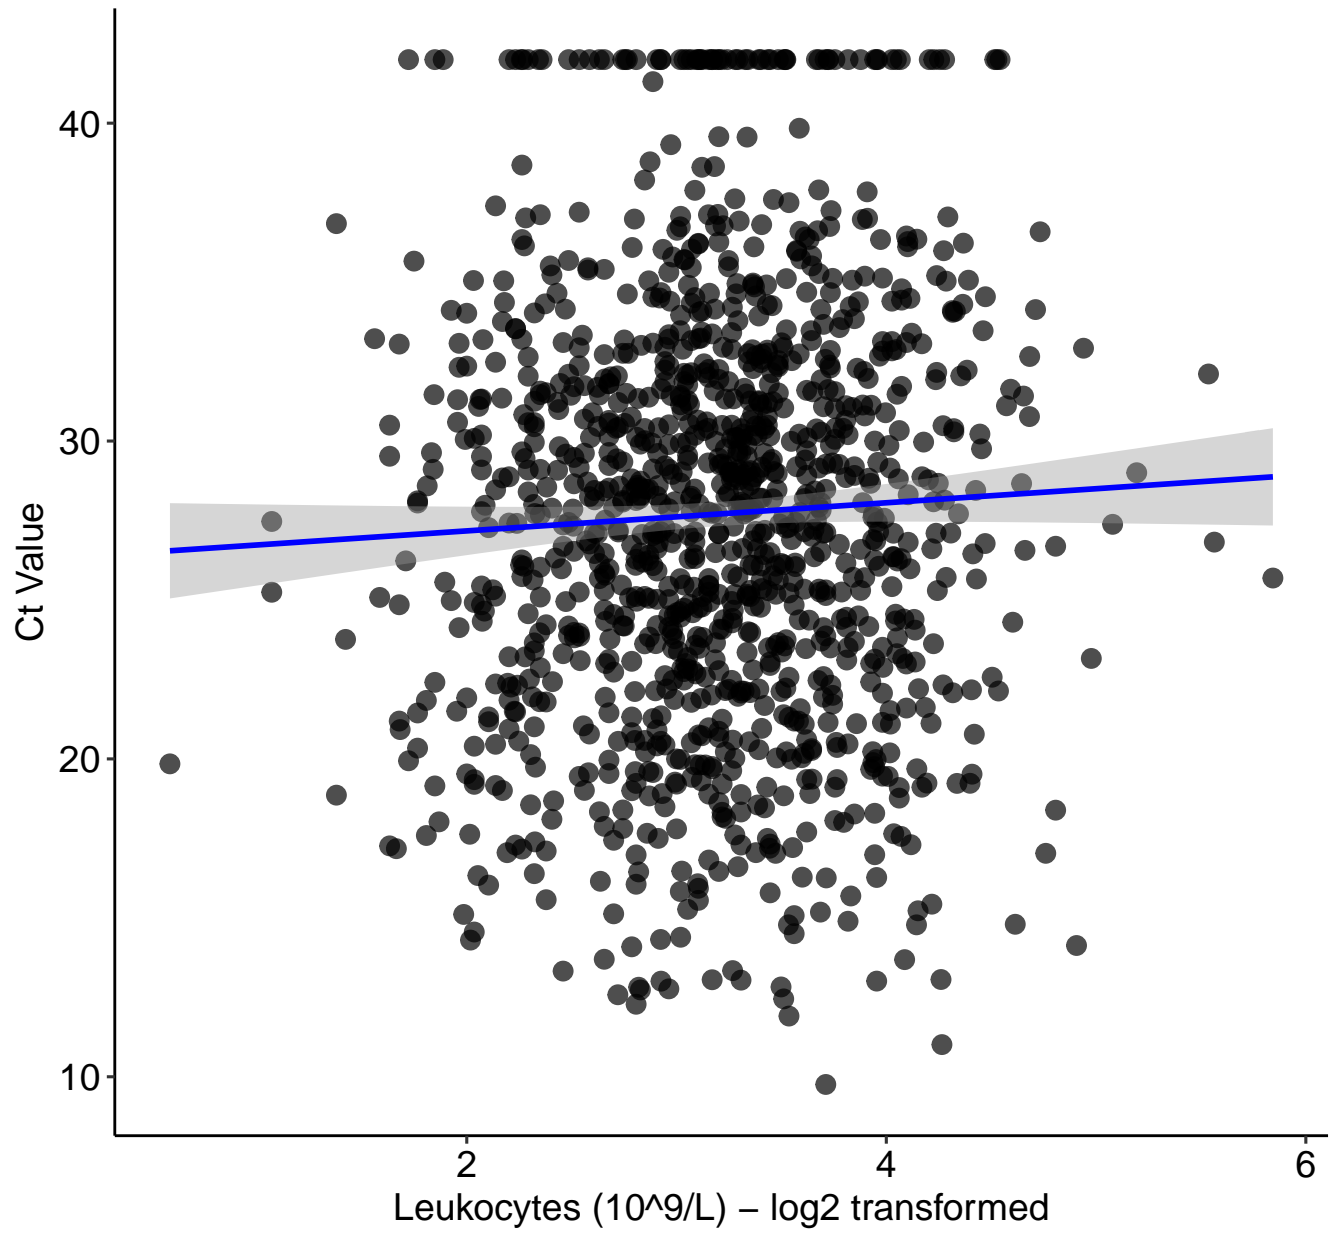

Lymphocytes ( $10^9/L$ )

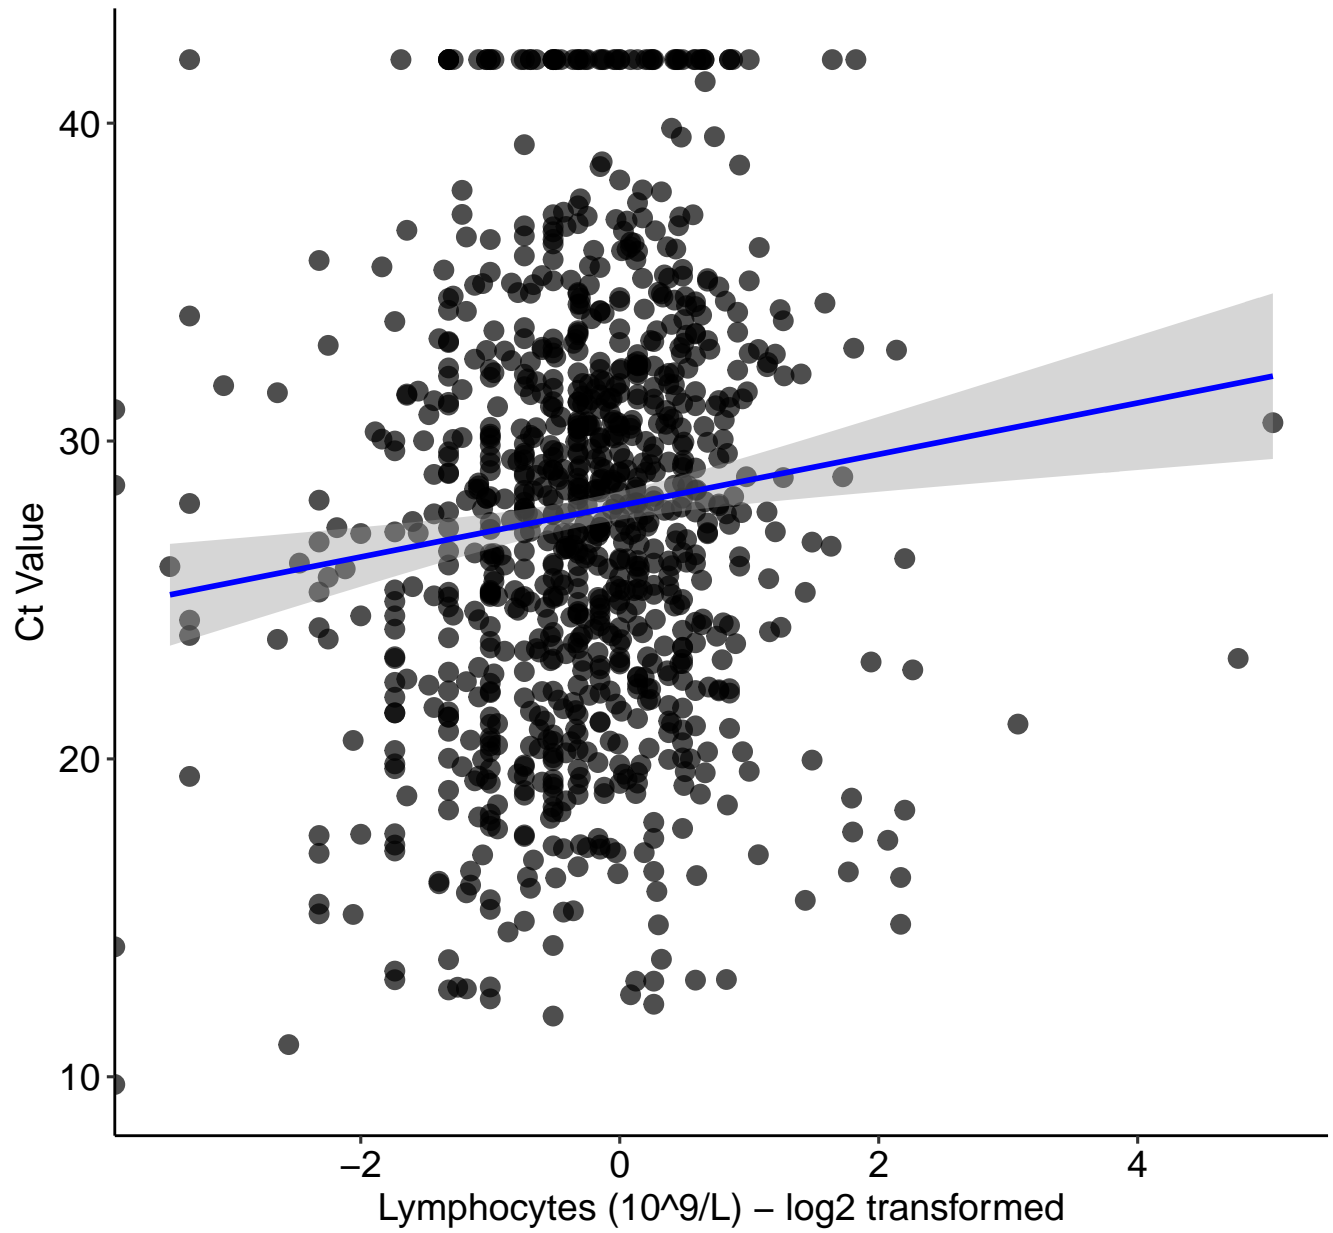

Monocytes ( $10^9/L$ )

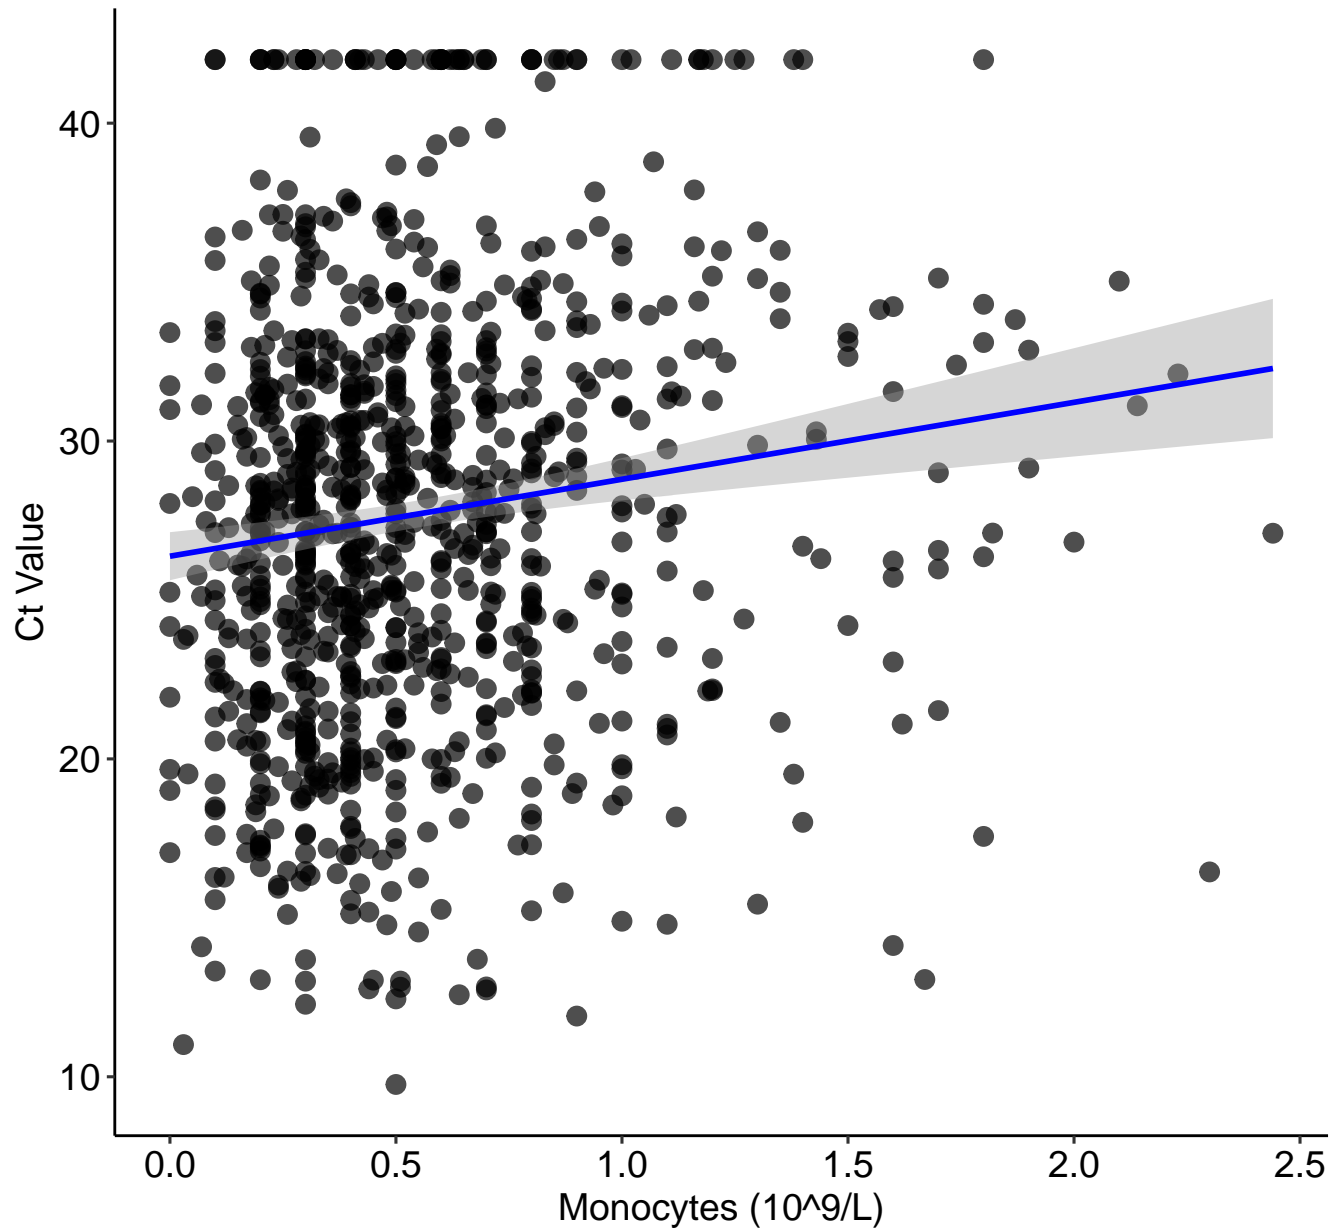

Neutrophils ( $10^9/L$ )

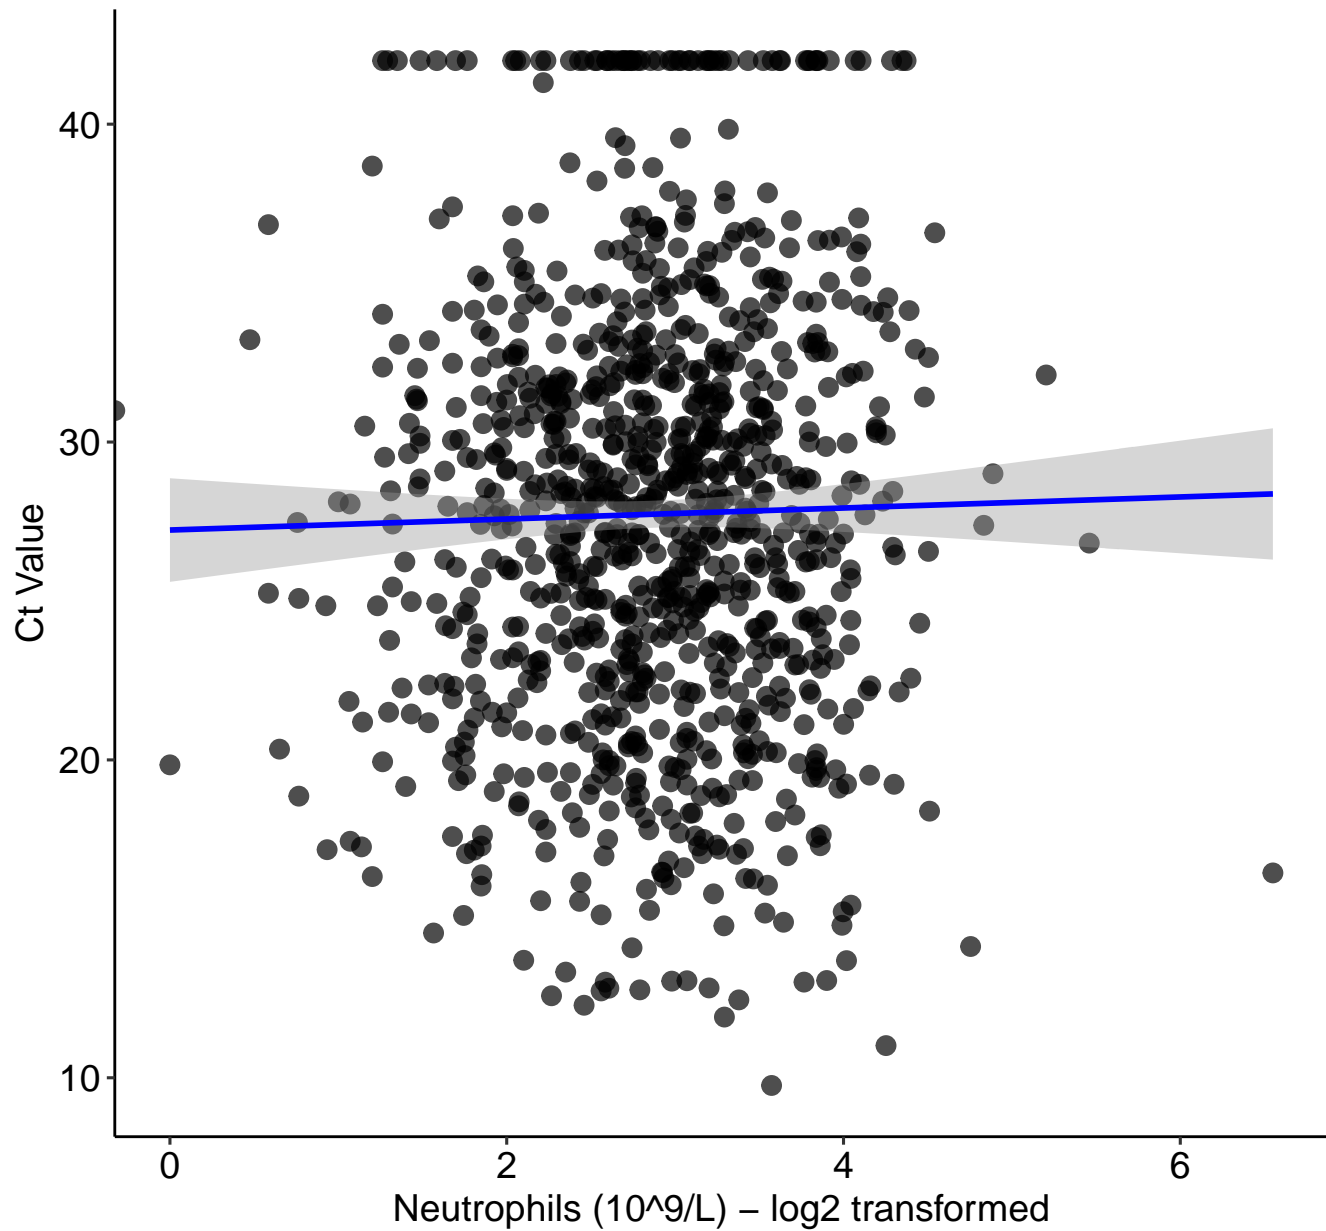



# Neutrophils–Lymphocyte Ratio

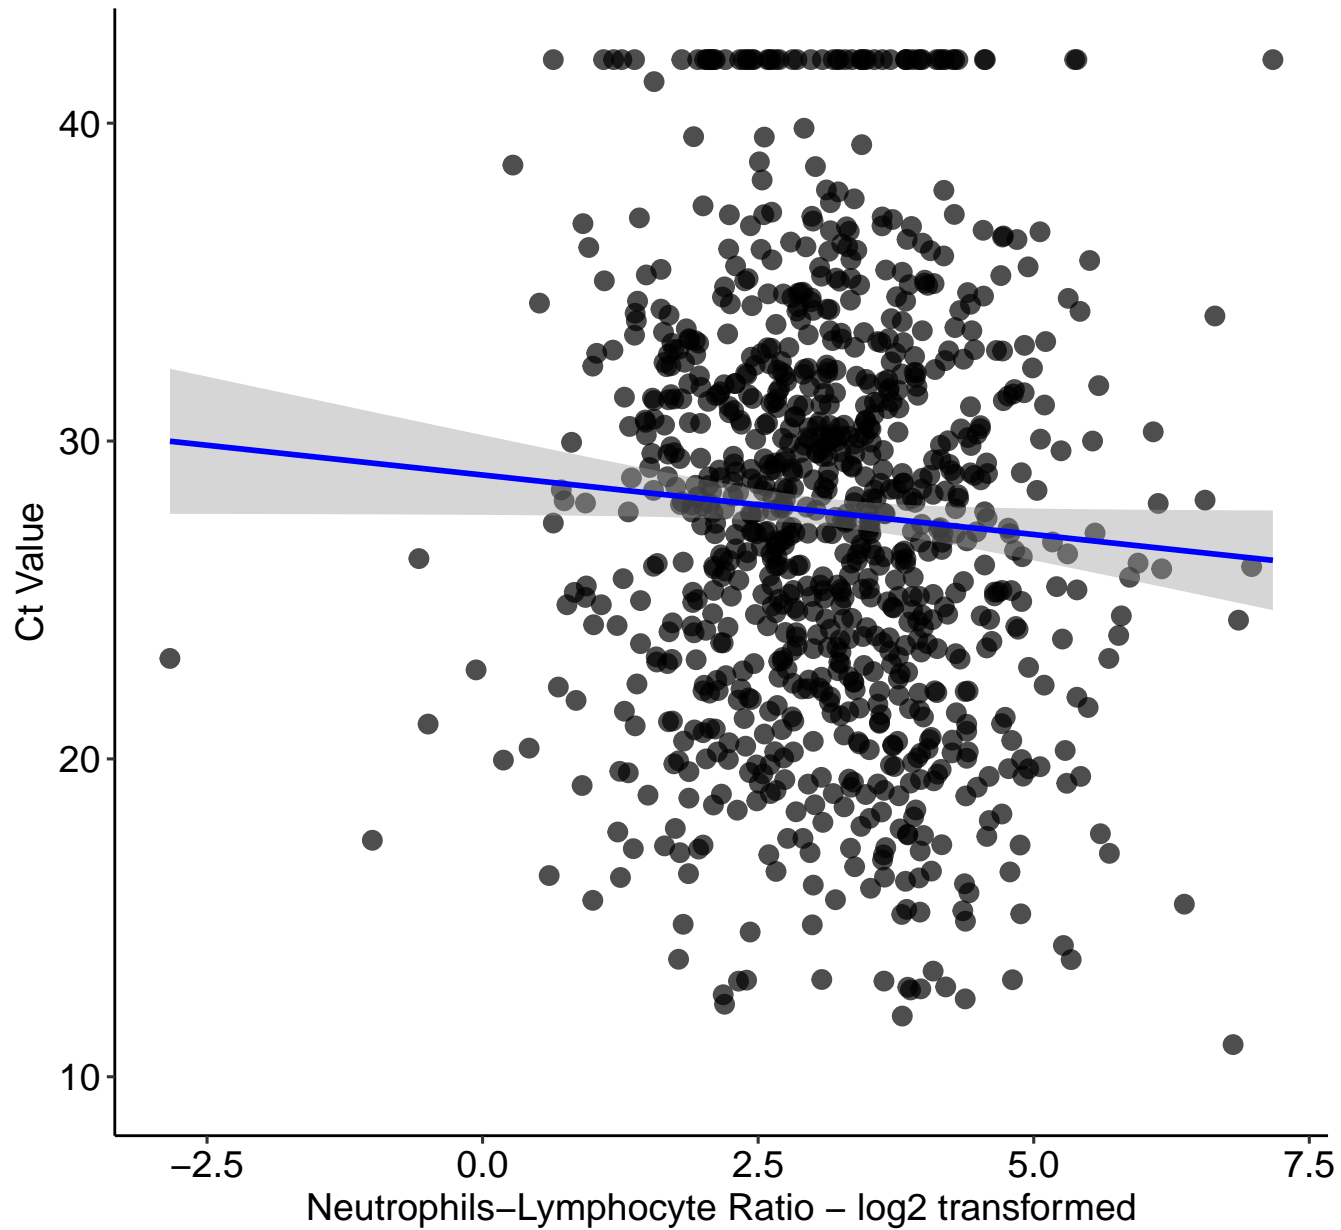



Partial Pressure Carbon Dioxide (mmHg)

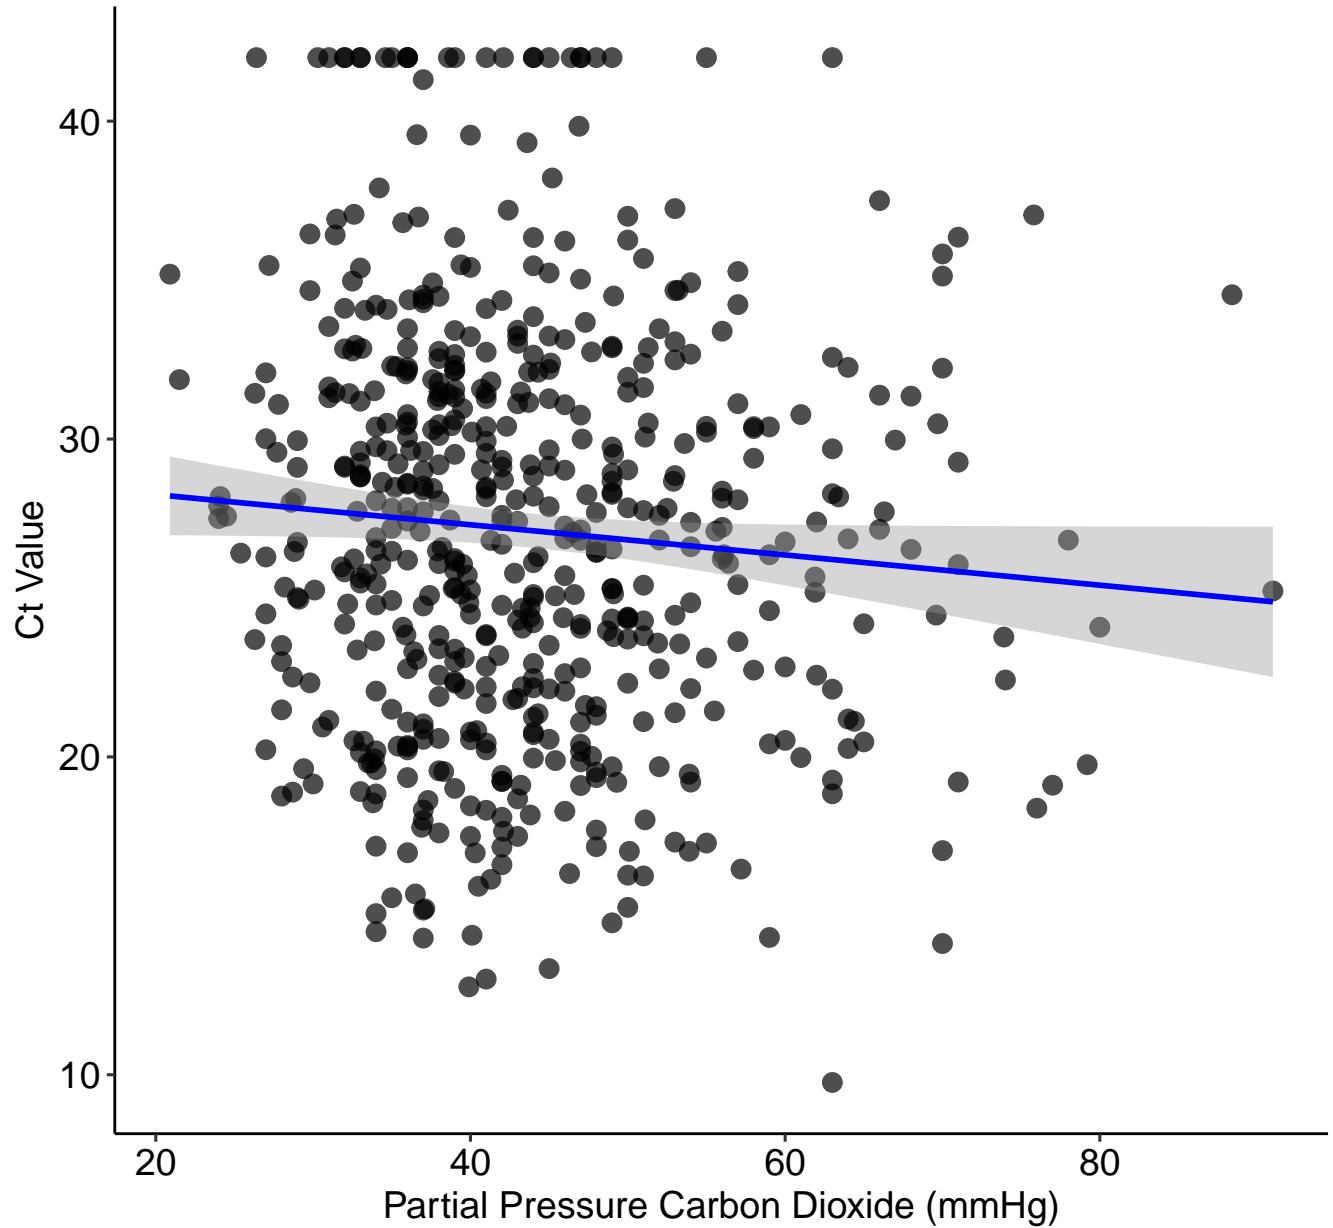

# Partial Pressure Oxygen (mmHg)

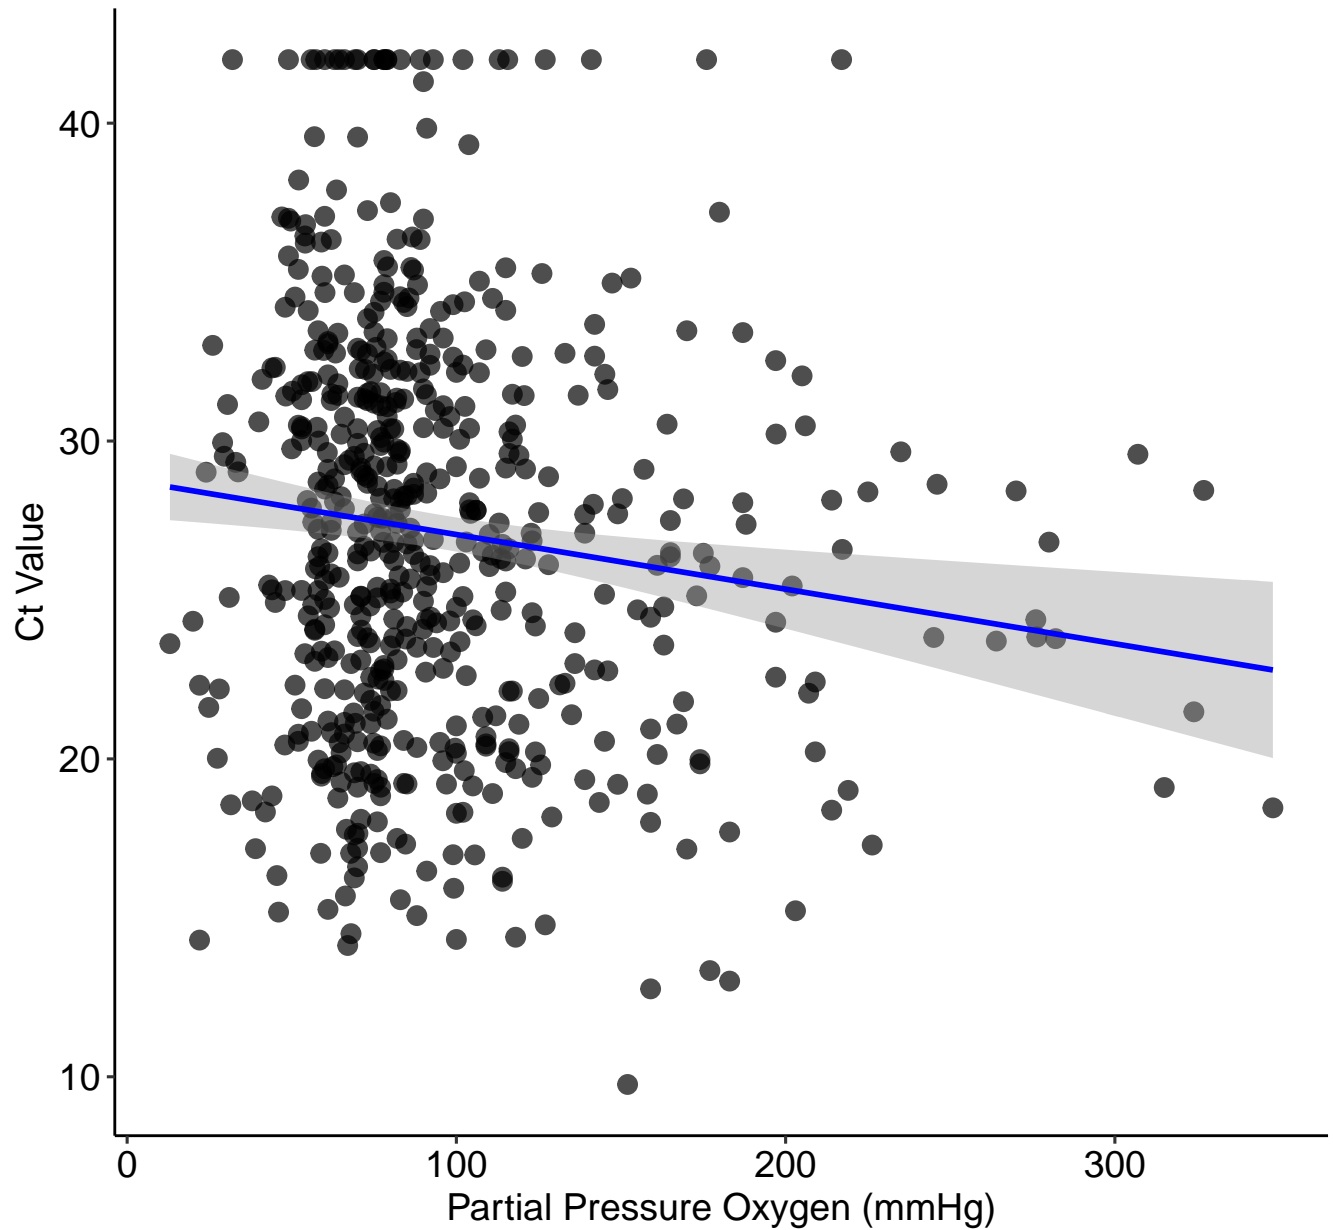

pH

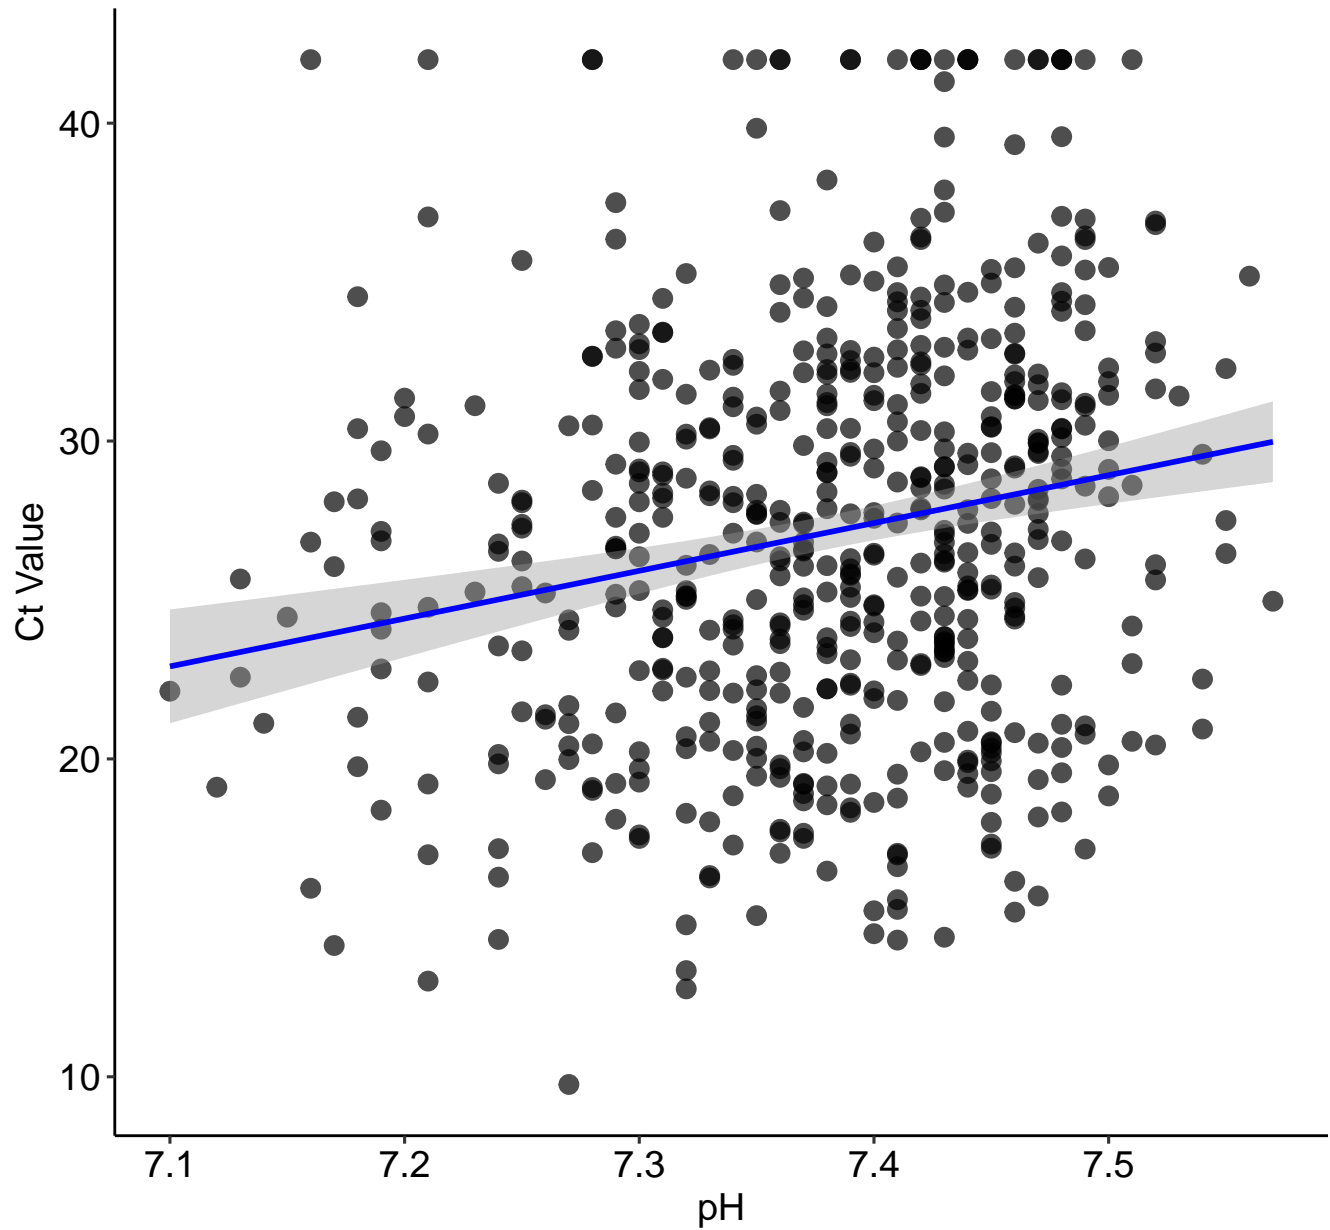

Platelets ( $10^9/L$ )

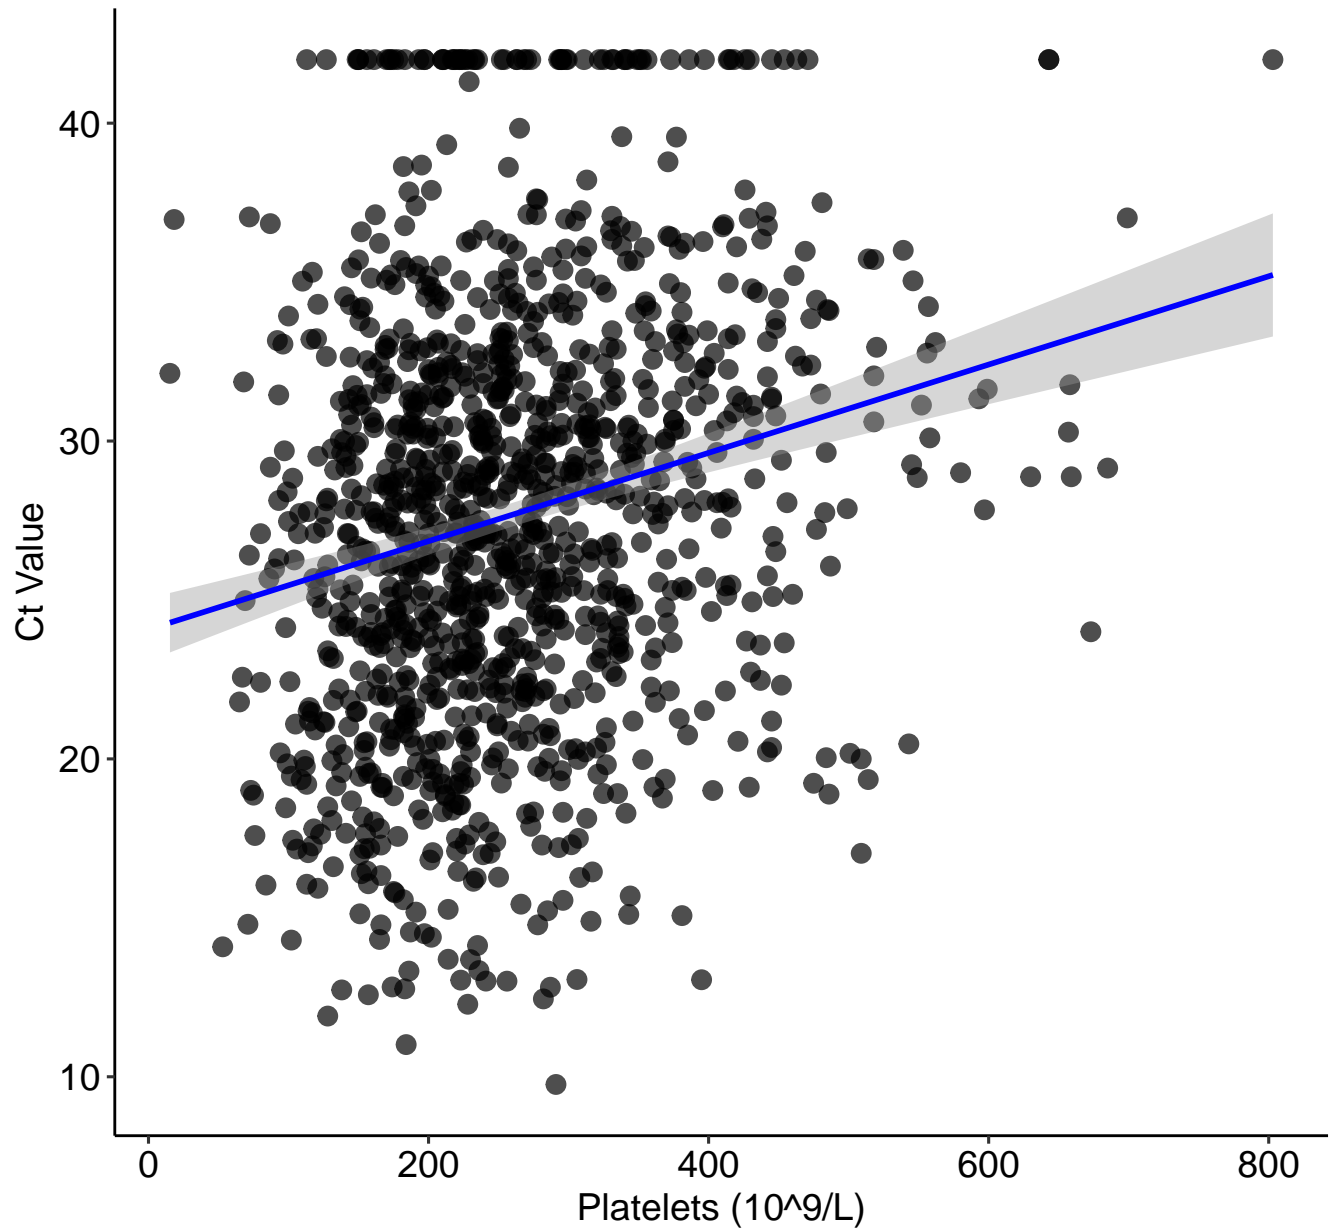

Potassium (mmol/L)

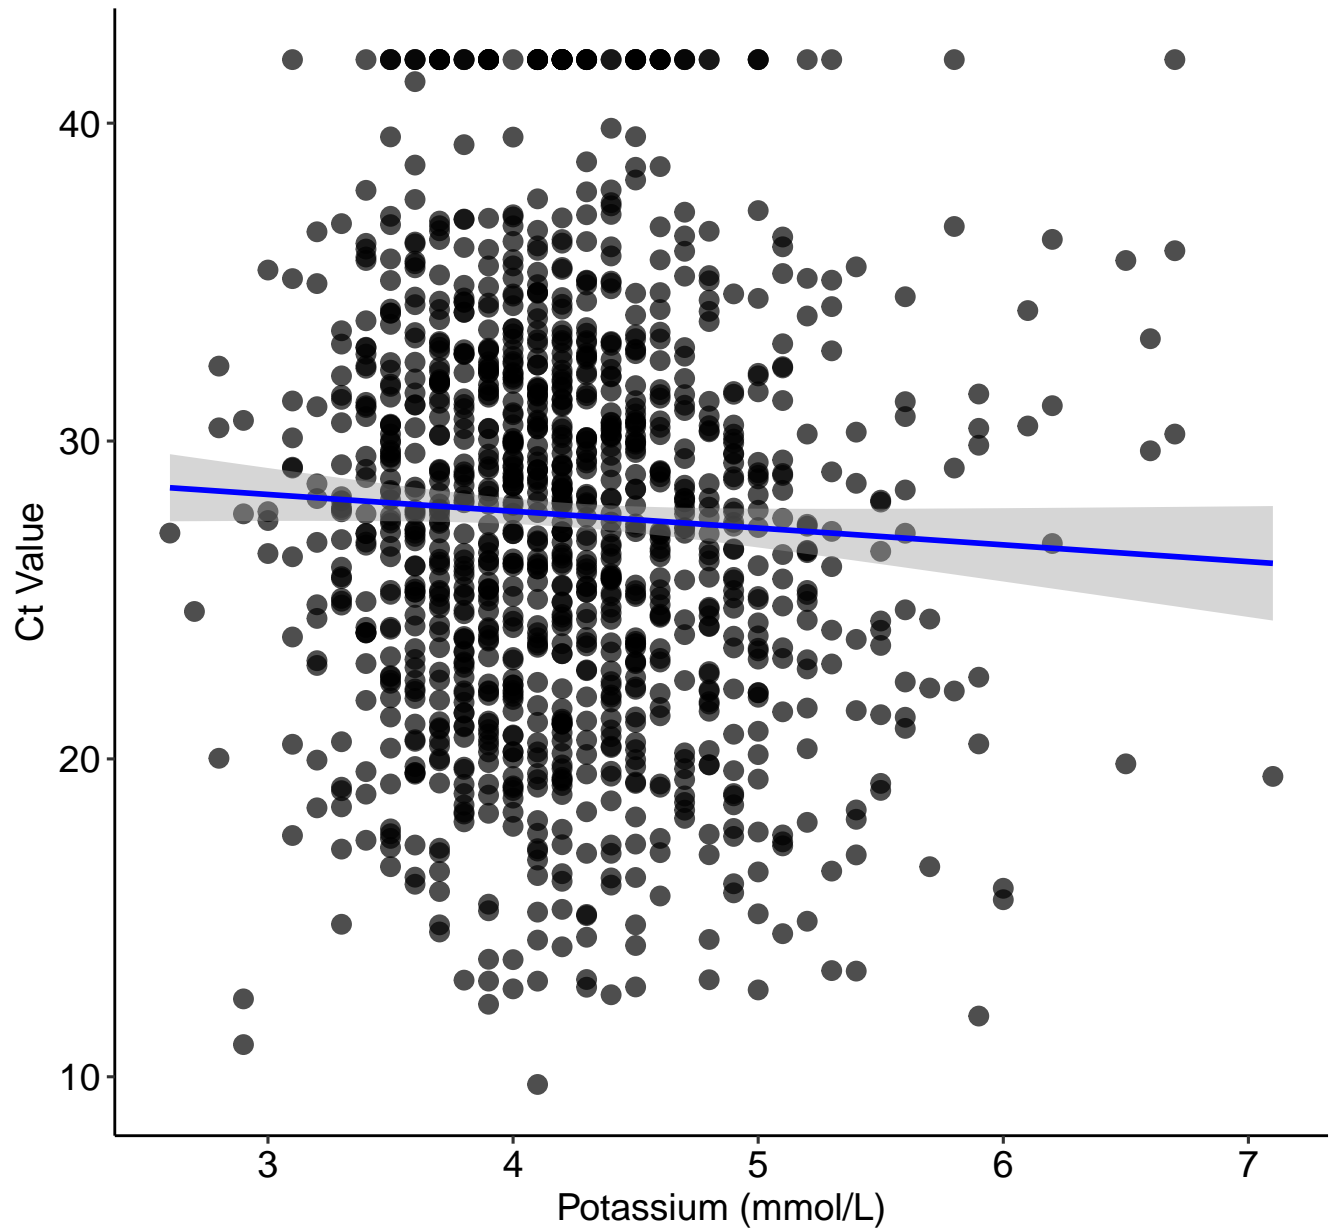

Protein (g/L)

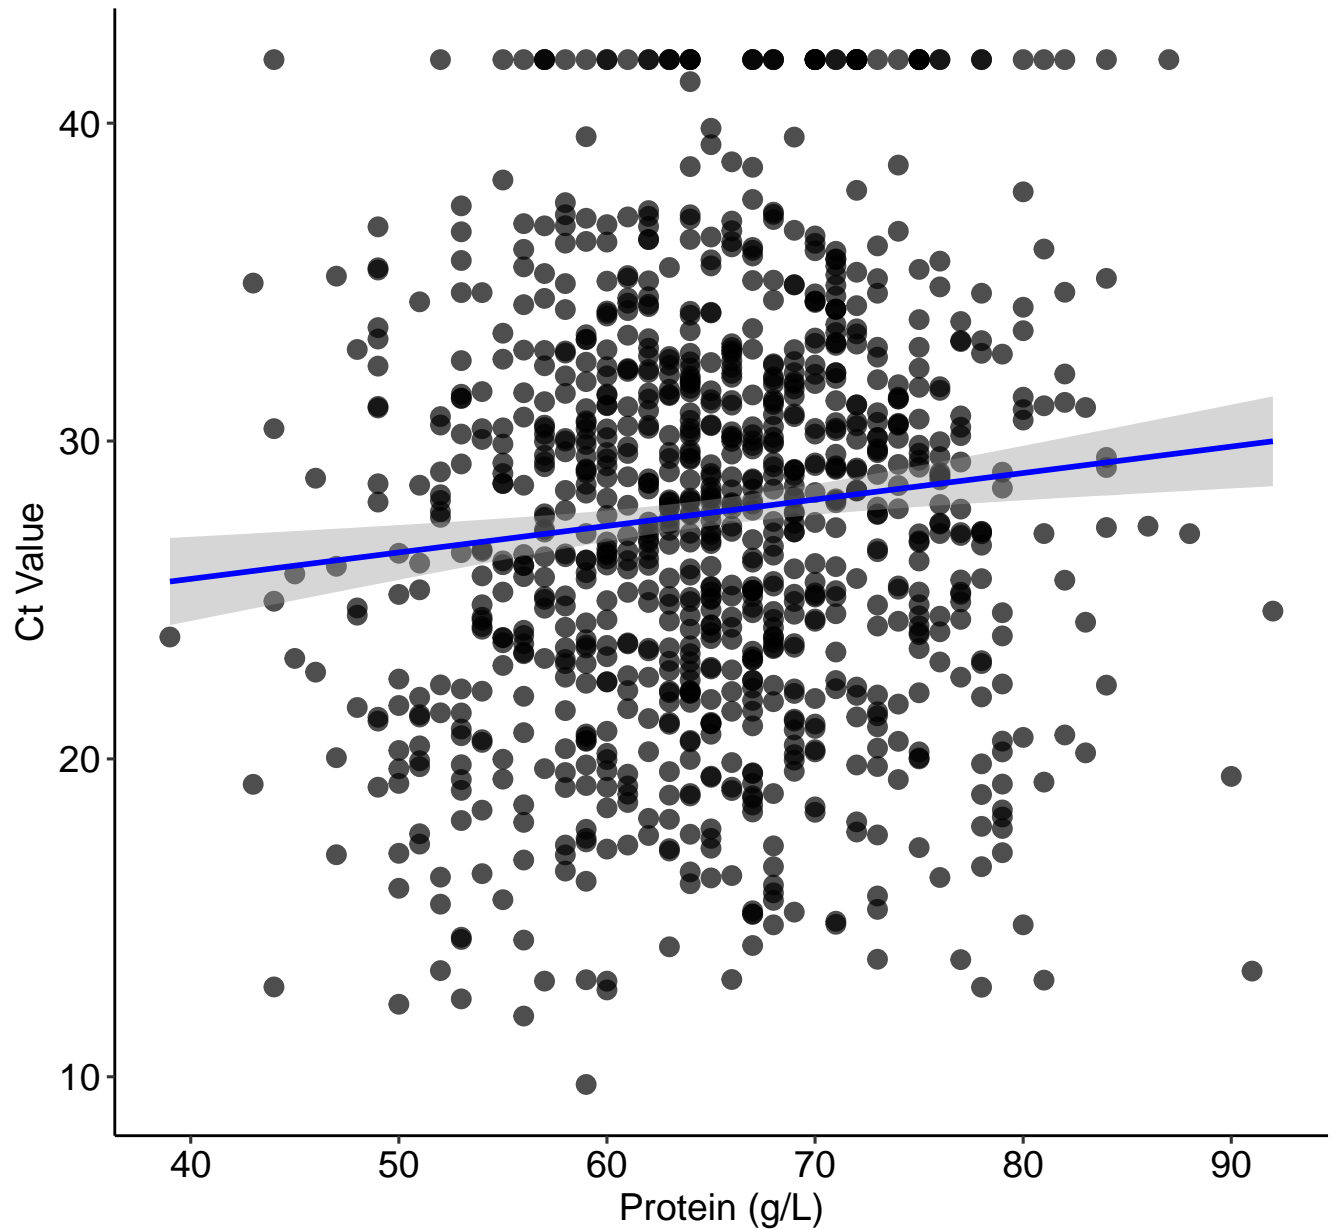



Sodium (mmol/L)

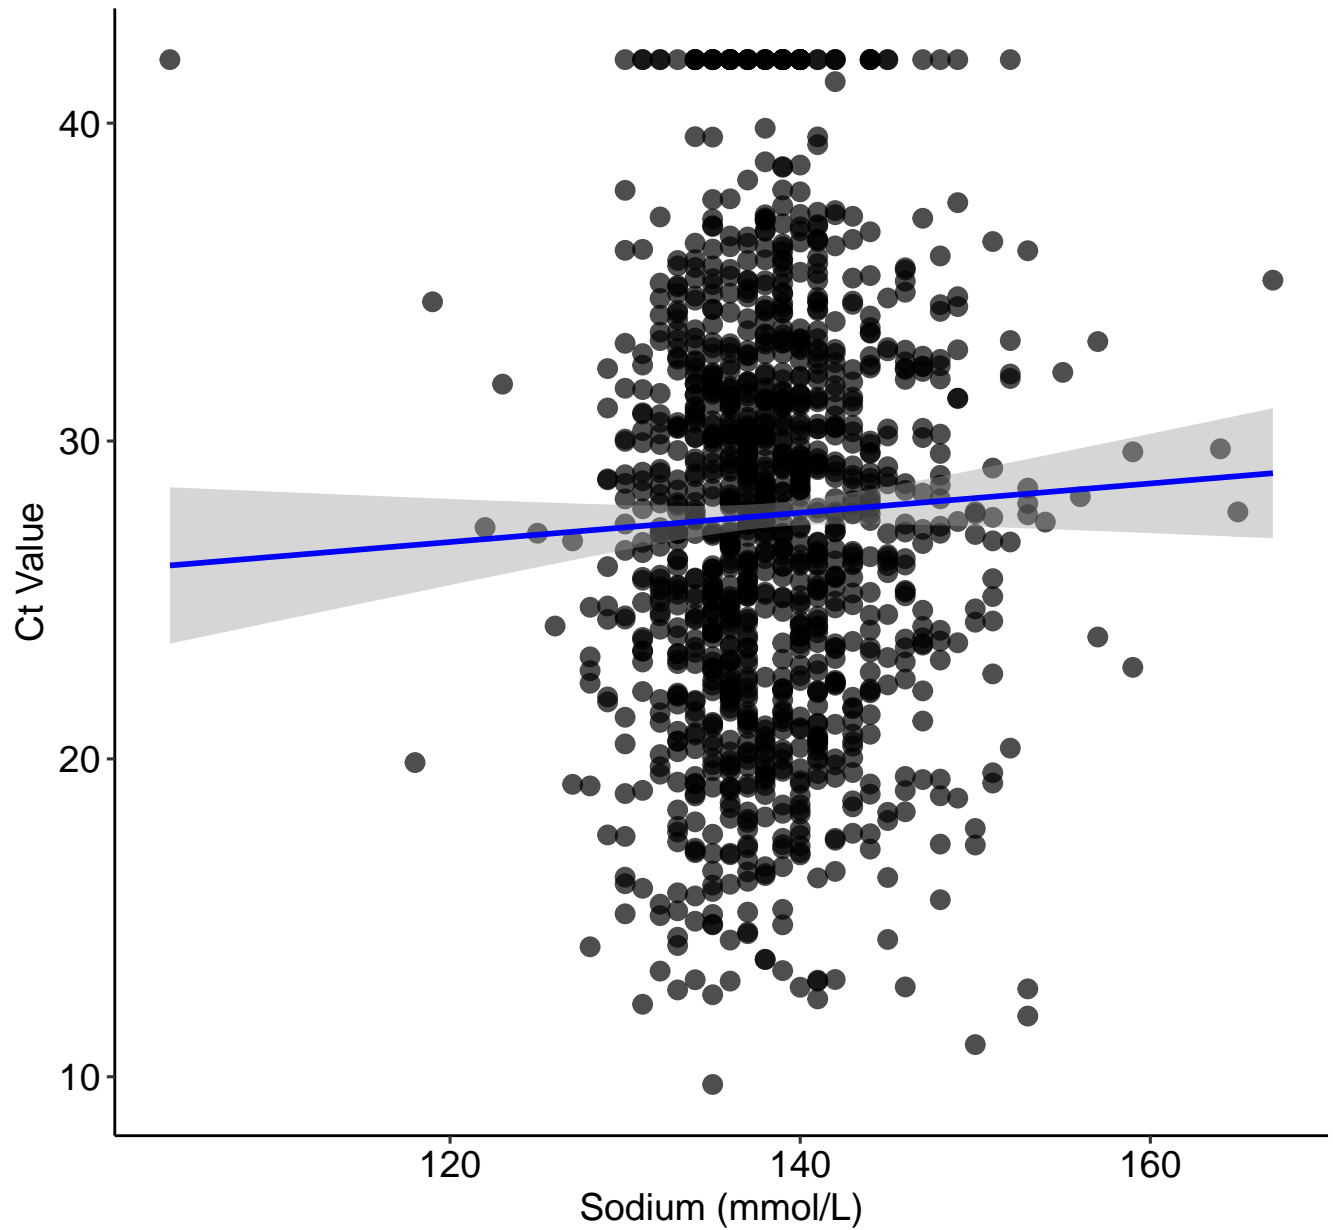

Triglycerides (mmol/L)

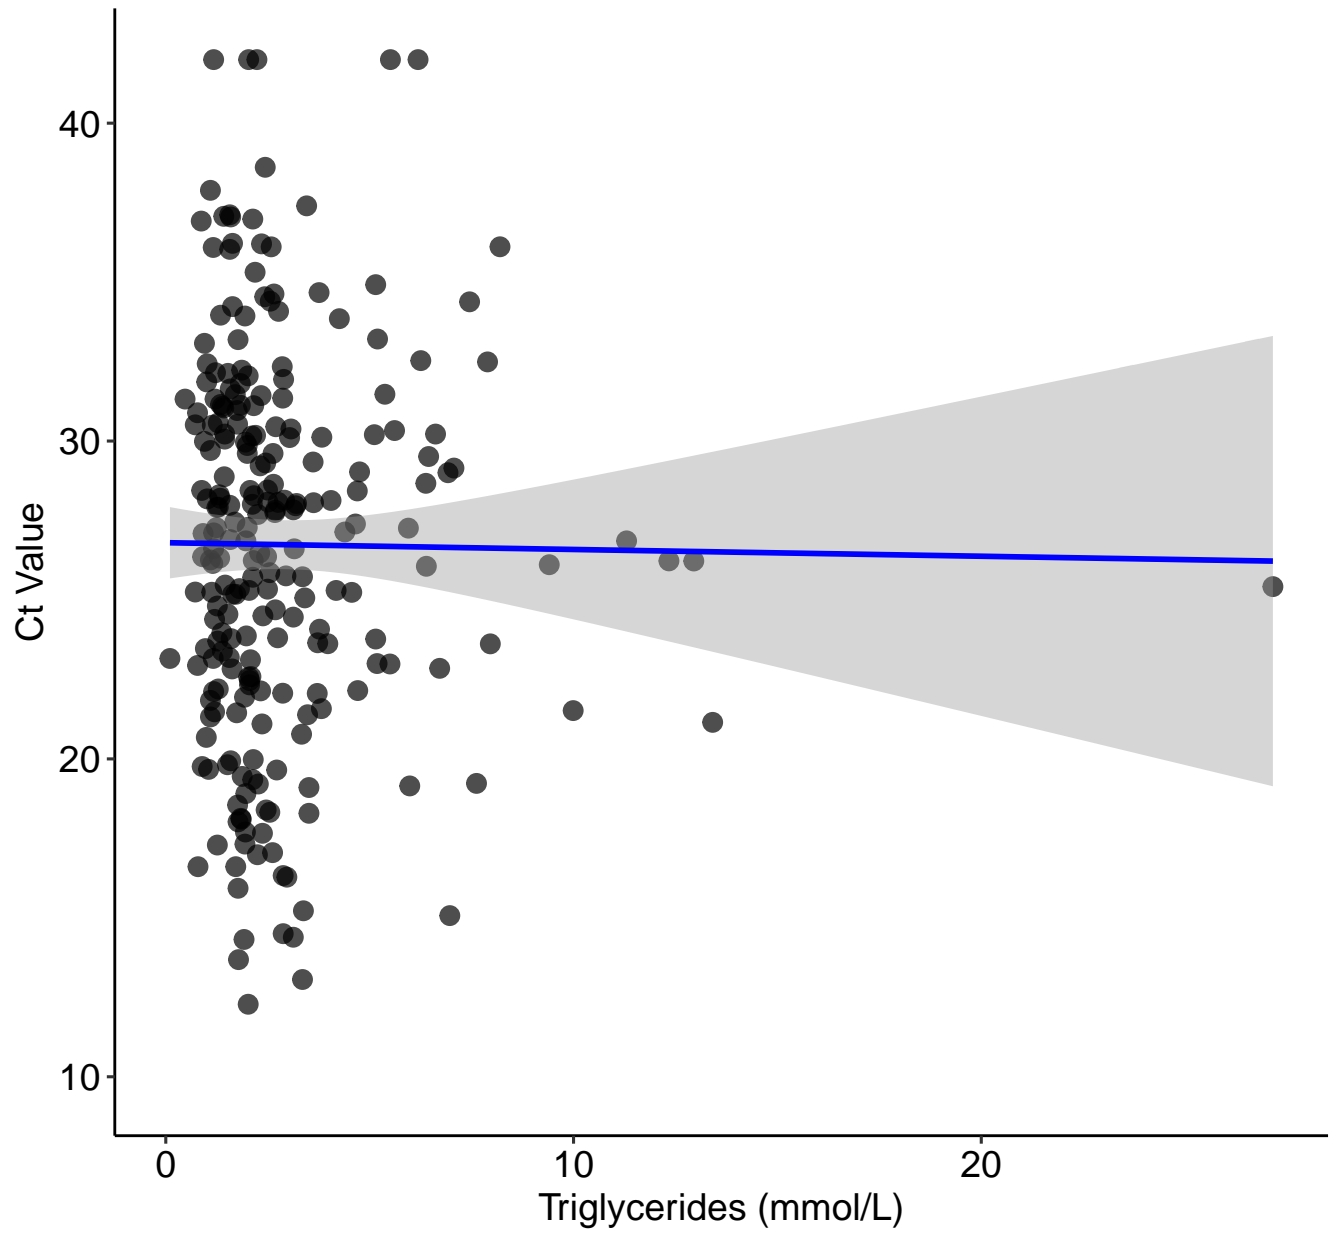

Urea Nitrogen (mmol/L)

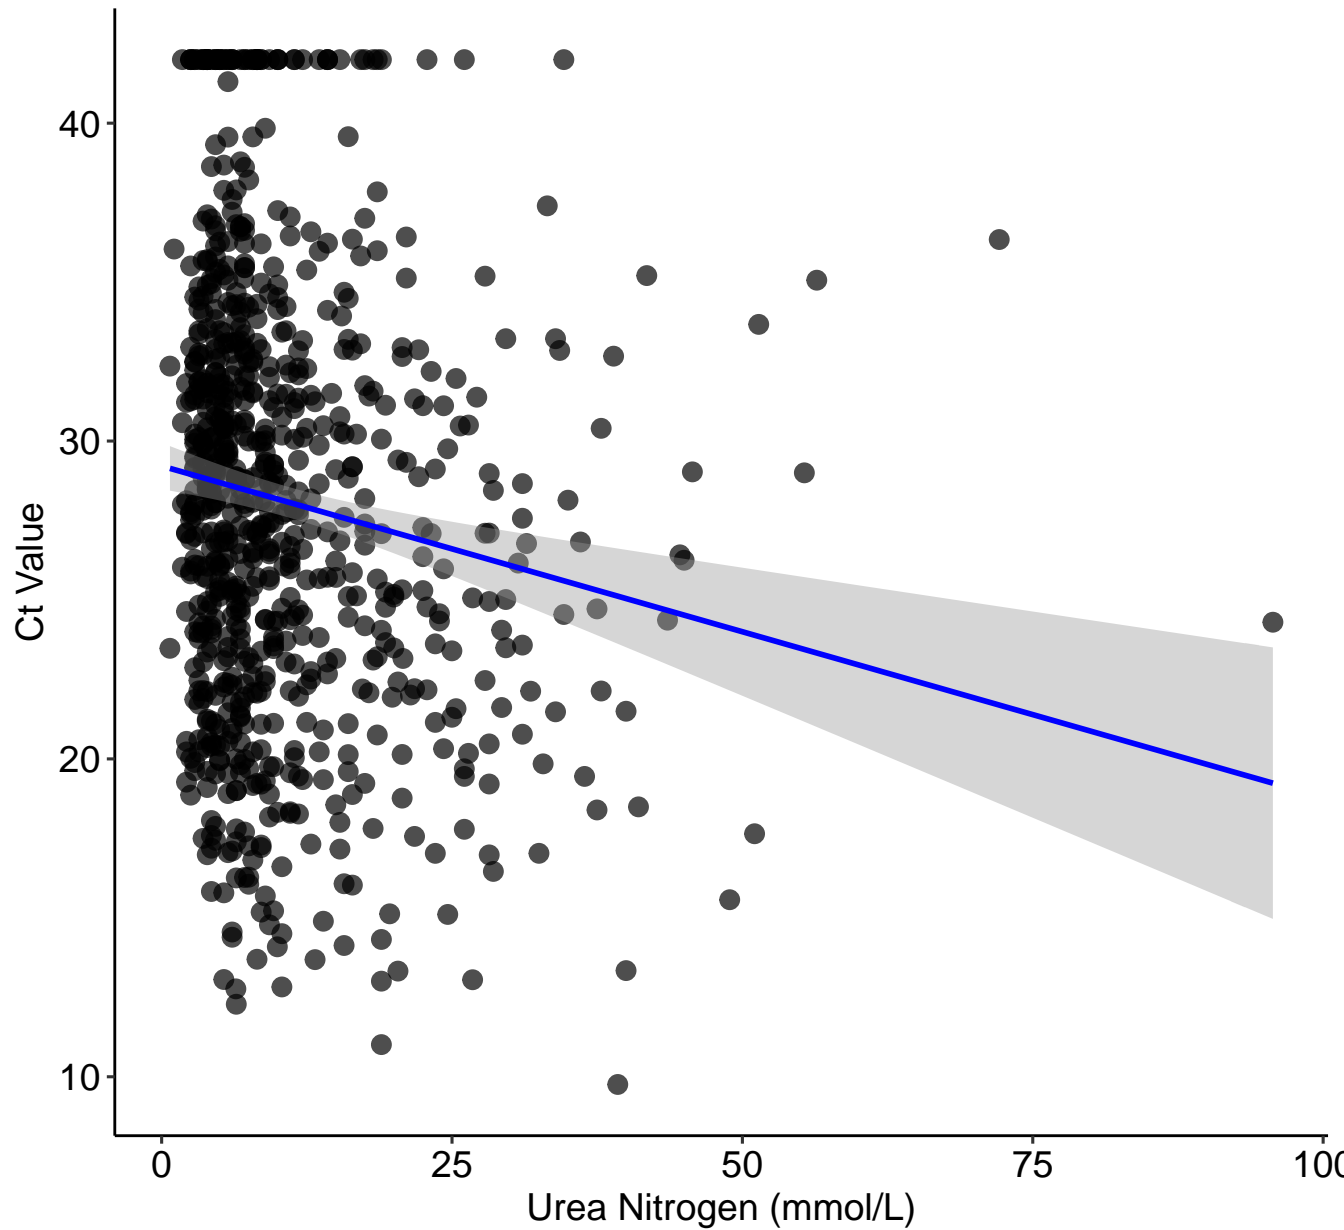

Supplement: jiab445_suppl_supplementary_figure_s2.pdf [file jiab445_suppl_supplementary_figure_s2.pdf]
